# Supplementary material for: A systematic review of differential rate of use of the word “evolve” across fields
Source: PeerJ. 2017 Aug 21;5:e3639. doi: 10.7717/peerj.3639 (PMC5572546; doi:10.7717/peerj.3639)
Supplement: Table S1 [file peerj-05-3639-s003.xlsx]

## Sheet: Sheet1
S1 Table. Newspaper Articles Used in Analysis.
Newspaper	Category	Title	URL	Author	Date	Evolve	Substitute Words
Chicago Sun-Times	HIV Resistance	AIDS patients build a resistance to AZTHide Details	http://infoweb.newsbank.com/resources/doc/nb/news/0EB36E431FA108E8?p=AWNB	Chicago Sun-Times Wires	1989-03-15	No	Develop
Chicago Sun-Times	HIV Resistance	AIDS toll expected to soar in '90s	http://infoweb.newsbank.com/resources/doc/nb/news/0EB36E8C34E3CEB3?p=AWNB	William Hines	1989-12-03	No	Develop
Chicago Sun-Times	HIV Resistance	Experts urge OK for new AIDS drug	http://infoweb.newsbank.com/resources/doc/nb/news/0EB3735DCCBFA511?p=AWNB	Liz Hunt	1991-07-20	No
Chicago Sun-Times	HIV Resistance	Study shows early use of AZT doesn't prolong life	http://infoweb.newsbank.com/resources/doc/nb/news/0EB3739917C553DB?p=AWNB	Robert Steinbrook	1992-02-13	No	Develop
Chicago Sun-Times	HIV Resistance	HIV UPDATE	http://infoweb.newsbank.com/resources/doc/nb/news/0EB373ABE691C03A?p=AWNB	Medical Tribune News Servic	1992-04-25	No	Mutate
Chicago Sun-Times	HIV Resistance	Drug Research Stalls - Early Cure Unlikely	http://infoweb.newsbank.com/resources/doc/nb/news/0EB421D1DE8C142A?p=AWNB	Ben Hirschler	1994-08-07	No	Develop
Chicago Sun-Times	HIV Resistance	Asia Conference On AIDS Yields Little New Data	http://infoweb.newsbank.com/resources/doc/nb/news/0EB421D378BF8085?p=AWNB	David Brown	1994-08-14	No	Develop
Chicago Sun-Times	HIV Resistance	Drug May Slow Spread of AIDS	http://infoweb.newsbank.com/resources/doc/nb/news/0EB421F2DE2C885A?p=AWNB	Reuters	1994-11-27	No	Develop
Chicago Sun-Times	HIV Resistance	AIDS Drugs Put Firms in Tight Race	http://infoweb.newsbank.com/resources/doc/nb/news/0EB4227452021E30?p=AWNB	DELLA DE LAFUENTE	1995-11-27	No	Develop
Chicago Sun-Times	HIV Resistance	Drugs Put the Brakes on HIV - Virus Virtually Gone in Tests After 6 Months	http://infoweb.newsbank.com/resources/doc/nb/news/0EB4228B0E3307DE?p=AWNB	MARLENE CIMONS	1996-01-30	No	Mutate
Chicago Sun-Times	HIV Resistance	PROMISING AIDS DRUGS	http://infoweb.newsbank.com/resources/doc/nb/news/0EB422901005CE70?p=AWNB	Chicago Sun-Times	1996-02-18	No	Develop
Chicago Sun-Times	HIV Resistance	Low-cost leukemia drug may help fight HIV	http://infoweb.newsbank.com/resources/doc/nb/news/0EB4237A2A728710?p=AWNB	THOMAS H	1998-02-06	No	Develop
Chicago Sun-Times	HIV Resistance	HIV hits 30% of young, gay blacks in 6 cities	http://infoweb.newsbank.com/resources/doc/nb/news/0EB424C2CF397750?p=AWNB	Chicago Sun-Times	2001-02-06	No	Develop
Chicago Sun-Times	HIV Resistance	HIV drugs losing punch	http://infoweb.newsbank.com/resources/doc/nb/news/0EB424C34E99E43F?p=AWNB	Chicago Sun-Times	2001-02-08	No	Develop, Mutate
Chicago Sun-Times	HIV Resistance	Resistance testing gives patients more options	http://infoweb.newsbank.com/resources/doc/nb/news/0EB424C34E466F04?p=AWNB	Jim Ritter	2001-02-08	No
Chicago Sun-Times	HIV Resistance	AIDS drug access still poor in Africa - Medicines' cost, red tape called barriers to UN initiative	http://infoweb.newsbank.com/resources/doc/nb/news/0F364DACDCE32B79?p=AWNB	Theresa AgoviNo, AP	2002-03-29	No
Chicago Sun-Times	HIV Resistance	HIV drug Kaletra proves effective in 5-year study	http://infoweb.newsbank.com/resources/doc/nb/news/0FDDE5CDA3C9EAC5?p=AWNB	Francine KNowles	2003-09-16	Yes	Develop
Chicago Sun-Times	HIV Resistance	New hope: AIDS treatment may even prevent infection	http://infoweb.newsbank.com/resources/doc/nb/news/0FF5B16FA7B1A10C?p=AWNB	Marilyn Chase	2003-12-05	No	Develop
Chicago Sun-Times	HIV Resistance	HIV organs for HIV patients - Doctors urge state to allow transplants to alleviate shortage	http://infoweb.newsbank.com/resources/doc/nb/news/101F8A1B187A9981?p=AWNB	Jim Ritter	2004-04-04	No	Develop
Chicago Sun-Times	HIV Resistance	FDA letter asks Abbott to pull Kaletra promotions // Agency says they overstate HIV drug's effectiveness	http://infoweb.newsbank.com/resources/doc/nb/news/106AB2F4F1338D1B?p=AWNB	Francine KNowles	2004-11-03	No
Cleveland Plain Dealer	HIV Resistance	AZT DOESN'T ADD TO LIFE, STUDY FINDS	http://infoweb.newsbank.com/resources/doc/nb/news/0F8038B8E2BE4D65?p=AWNB	n/a	1992-02-13	No	Develop
Cleveland Plain Dealer	HIV Resistance	JURY IS STILL OUT ON AZT AS DRUG FOR AIDS	http://infoweb.newsbank.com/resources/doc/nb/news/0F803B1BF440718A?p=AWNB	Plain Dealer	1992-06-09	No	Develop, Emerge
Cleveland Plain Dealer	HIV Resistance	AIDS VIRUS BECOMING RESISTANT TO AZT	http://infoweb.newsbank.com/resources/doc/nb/news/0F806F11625D3C88?p=AWNB	Plain Dealer	1993-01-01	No	Develop
Cleveland Plain Dealer	HIV Resistance	AIDS RESEARCHERS DEBATE AZT STUDIES CONTRADICTORY ON USING DRUG BEFORE OR AFTER AIDS SYMPTOMS APPEAR	http://infoweb.newsbank.com/resources/doc/nb/news/0F8074C44278CF32?p=AWNB	Plain Dealer	1993-06-07	No	Develop
Cleveland Plain Dealer	HIV Resistance	FDA ADVISERS RECOMMEND APPROVAL OF NEW AIDS DRUG	http://infoweb.newsbank.com/resources/doc/nb/news/0F807CF22499491E?p=AWNB	Plain Dealer	1994-05-21	No	Mutate
Cleveland Plain Dealer	HIV Resistance	EXPERTS STRESS AIDS THREAT FOR ASIA	http://infoweb.newsbank.com/resources/doc/nb/news/0F807D62E7D165E6?p=AWNB	Plain Dealer	1994-08-09	Yes	Develop
Cleveland Plain Dealer	HIV Resistance	AIDS VIRUS CALLED HIGH-SPEED IMMUNE SYSTEM IN PITCHED BATTLE	http://infoweb.newsbank.com/resources/doc/nb/news/0F8083EDC366F61A?p=AWNB	FROM WIRE REPORTS	1995-01-12	No	Develop, Mutate
Cleveland Plain Dealer	HIV Resistance	AIDS DRUG PROMISING WHEN USED WITH AZT	http://infoweb.newsbank.com/resources/doc/nb/news/0F80840609E97EDB?p=AWNB	Plain Dealer	1995-02-02	No	Mutate
Cleveland Plain Dealer	HIV Resistance	STUDIES HELP DOCTORS CHOOSE BEST DRUGS FOR AIDS PATIENTS	http://infoweb.newsbank.com/resources/doc/nb/news/0F8084354621EBCF?p=AWNB	LAURA YEE PLAIN	1995-03-16	No	Develop
Cleveland Plain Dealer	HIV Resistance	AIDS DRUGS CALLED MOST POTENT YET	http://infoweb.newsbank.com/resources/doc/nb/news/0F8086FD0E56037B?p=AWNB	LAURAN NEERGAARD	1995-11-05	No	Develop
Cleveland Plain Dealer	HIV Resistance	HIV EXPERTS FINALLY HAVE HOPE OF DEFEATING MORTAL ENEMY	http://infoweb.newsbank.com/resources/doc/nb/news/0F808CFB9C931903?p=AWNB	FROM WIRE REPORTS	1996-07-07	No
Cleveland Plain Dealer	HIV Resistance	AIDS HELP FOR MEXICANS DWINDLES	http://infoweb.newsbank.com/resources/doc/nb/news/0F80C5415FA2F0D4?p=AWNB	DANA CALVO	1997-03-20	No	Adapt
Cleveland Plain Dealer	HIV Resistance	NEW AIDS GUIDELINES CALL FOR TRIPLE ATTACK	http://infoweb.newsbank.com/resources/doc/nb/news/0F80C7A6F5614A31?p=AWNB	MARLENE CIMONS	1997-06-19	No	Develop
Cleveland Plain Dealer	HIV Resistance	TEAM ADDS NEW MOLECULE TO ITS ARSENAL AGAINST AIDS	http://infoweb.newsbank.com/resources/doc/nb/news/0F80CD195F81F48E?p=AWNB	PAUL RECER	1997-10-24	No	Develop
Cleveland Plain Dealer	HIV Resistance	AIDS TREATMENT FALLS SHORT OF KILLING VIRUS IN ALL CELLS	http://infoweb.newsbank.com/resources/doc/nb/news/0F80CDD4C330AD17?p=AWNB	PAUL RECER	1997-11-14	No	Develop
Cleveland Plain Dealer	HIV Resistance	LOWER-COST DRUG SHOWS PROMISE IN TREATING AIDS, RESEARCHERS SAY	http://infoweb.newsbank.com/resources/doc/nb/news/0F80CF71235CE5B4?p=AWNB	THOMAS H. MAUGH	1998-02-06	No	Develop, Mutate
Cleveland Plain Dealer	HIV Resistance	DIFFERENT AIDS STRAINS FOUND IN BLOOD, SEMEN	http://infoweb.newsbank.com/resources/doc/nb/news/0F80D0A7C4C01951?p=AWNB	PAUL NoWELL	1998-10-15	No	Develop, Mutate
Cleveland Plain Dealer	HIV Resistance	STUDY LINKS MUTATION, HIV RISK IN SOME BLACKS	http://infoweb.newsbank.com/resources/doc/nb/news/0F80D1EA643D5A71?p=AWNB	LAURIE GARRETT NEWSDAY	1999-02-03	No	Mutate
Cleveland Plain Dealer	HIV Resistance	PROMISING TREATMENT FOR AIDS LOSES LUSTER	http://infoweb.newsbank.com/resources/doc/nb/news/0F80D9AAC471C72F?p=AWNB	REGINA McENERY PLAIN	1999-12-01	No	Develop
Cleveland Plain Dealer	HIV Resistance	HIV REBOUND NoT ALWAYS DUE TO DRUG RESISTANCE	http://infoweb.newsbank.com/resources/doc/nb/news/0F80DAD5A05BF23A?p=AWNB	BRENDA C. COLEMAN	2000-01-12	No
Cleveland Plain Dealer	HIV Resistance	ANTIBIOTICS WILL NoT WORK IN 10-15 YEARS, GROUP WARNS	http://infoweb.newsbank.com/resources/doc/nb/news/0F80DB7133D3AF04?p=AWNB	JOHN DONNELLY	2000-06-13	Yes
Cleveland Plain Dealer	HIV Resistance	AIDS drug program costs taxing Ohio	http://infoweb.newsbank.com/resources/doc/nb/news/0F59E2CD6AFD90DB?p=AWNB	PAUL NoWELL	2002-08-19	No	Develop
Cleveland Plain Dealer	HIV Resistance	N.Y. man’s highly resistant HIV worries doctors Most drugs can’t fight rapid progression	http://infoweb.newsbank.com/resources/doc/nb/news/10865B33260D70B3?p=AWNB	Regina McEnery,	2005-02-20	No	Develop
Cleveland Plain Dealer	HIV Resistance	HIV specialists will convene in Cleveland World’s leaders take on issues of global patterns and origins	http://infoweb.newsbank.com/resources/doc/nb/news/109AC73C454D78D4?p=AWNB	Regina McEnery	2005-04-23	Yes	Mutate
Cleveland Plain Dealer	HIV Resistance	HIV study involving 6,000 women providing an invaluable database	http://infoweb.newsbank.com/resources/doc/nb/news/1137FED65D9AF2F0?p=AWNB	Regina McEnery,	2006-08-13	No	Develop
Cleveland Plain Dealer	HIV Resistance	UH seeks women to test HIV-protection products	http://infoweb.newsbank.com/resources/doc/nb/news/1178F116F4D423B0?p=AWNB	Regina McEnery,	2007-02-25	No	Develop
Cleveland Plain Dealer	HIV Resistance	UH researchers Develop earlier HIV-drug resistance tests	http://infoweb.newsbank.com/resources/doc/nb/news/14750563F2F6E7D0?p=AWNB	Angela Townsend,	2013-07-02	No
Cleveland Plain Dealer	HIV Resistance	Drug-resistance test for HIV Developed at UH to be marketed	http://infoweb.newsbank.com/resources/doc/nb/news/14F204C29788A880?p=AWNB	Angela Townsend	2014-07-17	No
Dallas Morning News	HIV Resistance	Research leads to earlier use of anti-AIDS drug - AZT delays onset of symptoms in HIV carriers	http://infoweb.newsbank.com/resources/doc/nb/news/0ED3D10DECAC368E?p=AWNB	Rita Rubin	1990-06-25	No	Develop
Dallas Morning News	HIV Resistance	Failure of 2 drugs underscores difficulties of AIDS fight	http://infoweb.newsbank.com/resources/doc/nb/news/0ED562998D309BBB?p=AWNB	Reuters Catherine Arnst	1991-12-08	No	Develop, Mutate
Dallas Morning News	HIV Resistance	Drug companies to share data to speed up AIDS research	http://infoweb.newsbank.com/resources/doc/nb/news/0ED3D37F779E6DE8?p=AWNB	Reuters	1993-04-20	No	Develop
Dallas Morning News	HIV Resistance	Pace of AIDS research is debated - Some say work proceeding rapidly; others contend action has stalled	http://infoweb.newsbank.com/resources/doc/nb/news/0ED3D39372AC1E21?p=AWNB	Reuters	1993-06-20	No
Dallas Morning News	HIV Resistance	FDA approves new AIDS drug - it will be available on Saturday	http://infoweb.newsbank.com/resources/doc/nb/news/0ED3D627192E70FF?p=AWNB	Associated Press	1995-12-08	No	Develop
Dallas Morning News	HIV Resistance	AIDS treatment outlook more upbeat than ever, researchers say Scientists list progress with new generation of drugs,sophisticated testing	http://infoweb.newsbank.com/resources/doc/nb/news/0ED3D6799847D2DE?p=AWNB	Marlene Cimons	1996-02-04	No	Develop, Mutate
Dallas Morning News	HIV Resistance	A DOSE OF HOPE - Scientists voice measured optimism over new class of AIDS drugs	http://infoweb.newsbank.com/resources/doc/nb/news/0ED3D68855EFFADC?p=AWNB	Laura Beil	1996-03-18	No	Develop
Dallas Morning News	HIV Resistance	FDA approves new AIDS medicine	http://infoweb.newsbank.com/resources/doc/nb/news/0ED3D6AFC5CD3A53?p=AWNB	Associated Press	1996-06-25	No	Develop, Mutate
Dallas Morning News	HIV Resistance	Protease inhibitors show much promise	http://infoweb.newsbank.com/resources/doc/nb/news/0ED3D6BB9F2E5868?p=AWNB	Barbra Rodriguez	1996-07-25	No	Develop
Dallas Morning News	HIV Resistance	Couple with AIDS aim to fulfill dreams after new drug replenishes their strength - The medication's side effects, however, prevent one Arlington man from taking it	http://infoweb.newsbank.com/resources/doc/nb/news/0ED3D6EF41819838?p=AWNB	Rosa Maria Santana	1996-11-24	No	Develop
Dallas Morning News	HIV Resistance	Faster action sought on AIDS drugs - 3 new potent medicines haven't been approved for kids	http://infoweb.newsbank.com/resources/doc/nb/news/0ED3D6F285715EB0?p=AWNB	Associated Press	1996-12-03	No
Dallas Morning News	HIV Resistance	Hundreds show up for AIDS fund-raiser	http://infoweb.newsbank.com/resources/doc/nb/news/0ED3D944179A23AC?p=AWNB	John McCoy	1997-09-08	No	Develop
Dallas Morning News	HIV Resistance	Molecule that blocks HIV from cells found	http://infoweb.newsbank.com/resources/doc/nb/news/0ED3D958CB12741F?p=AWNB	Associated Press	1997-10-24	No	Develop
Dallas Morning News	HIV Resistance	Hopes for AIDS cure dimmed `Cocktail' treatment unable to wipe out all traces of virus	http://infoweb.newsbank.com/resources/doc/nb/news/0ED3D9612829EC11?p=AWNB	Associated Press	1997-11-14	No	Develop
Dallas Morning News	HIV Resistance	Latest treatment found unable to eradicate HIV But virus doesn't Develop resistance to drugs, researchers say	http://infoweb.newsbank.com/resources/doc/nb/news/0ED3D961289FAC73?p=AWNB	Denise Grady	1997-11-14	Yes	Develop, Mutate
Dallas Morning News	HIV Resistance	U.N. project frustrates AIDS workers Most in Ivory Coast still can't afford high cost of potent drugs, they say	http://infoweb.newsbank.com/resources/doc/nb/news/0ED3D9711077328F?p=AWNB	Amba Dadson	1997-12-21	No	Develop
Dallas Morning News	HIV Resistance	Low-cost drug could help in AIDS fight	http://infoweb.newsbank.com/resources/doc/nb/news/0ED3DA8CDFD2889C?p=AWNB	Los Angeles Times	1998-02-06	No	Develop
Dallas Morning News	HIV Resistance	Drug defiance - Resistance to new medications is an emerging problem in battle against the AIDS virus	http://infoweb.newsbank.com/resources/doc/nb/news/0ED3DAD12D8C9AC0?p=AWNB	Laura Beil	1998-07-06	No	Develop, Mutate
Dallas Morning News	HIV Resistance	AIDS virus gaining resistance to potent drug cocktails, study says	http://infoweb.newsbank.com/resources/doc/nb/news/0ED3DB5C70F55C91?p=AWNB	Laura Beil	1999-02-05	No	Develop
Dallas Morning News	HIV Resistance	SCIENCE UPDATE	http://infoweb.newsbank.com/resources/doc/nb/news/0ED3DB5E2A672191?p=AWNB	Laura Beil	1999-02-08	No	Develop
Dallas Morning News	HIV Resistance	Drug-resistant HIV Noted in prison study Texas research may represent a first	http://infoweb.newsbank.com/resources/doc/nb/news/0EDABE56B4A5E6EC?p=AWNB	Laura Beil	2000-09-25	No	Develop
Dallas Morning News	HIV Resistance	New strains of HIV resist drug treatment	http://infoweb.newsbank.com/resources/doc/nb/news/0ED81D77872D5B4C?p=AWNB	Associated Press	2001-02-08	Yes	Emerge, Develop
Dallas Morning News	HIV Resistance	AIDS: A growing complacency - Drugs, their ads undermine prevention, experts say	http://infoweb.newsbank.com/resources/doc/nb/news/0ED81ED496560258?p=AWNB	Charles Ornstein	2001-06-03	No	Develop
Dallas Morning News	HIV Resistance	Review blasts Tarrant jails' medical care - Inmates often must wait weeks to receive treatment, report says	http://infoweb.newsbank.com/resources/doc/nb/news/1077C3FAF32E80B9?p=AWNB	Jeff Mosier	2005-01-07	No	Develop
Dallas Morning News	HIV Resistance	Running out of time - New barriers to drugs could worsen Guatemala's long-igNored AIDS problem	http://infoweb.newsbank.com/resources/doc/nb/news/10EC7327D262F860?p=AWNB	Ernesto Londoño	2005-12-27	No	Develop
Dallas Morning News	HIV Resistance	A war short on warriors - Lack of medical workers stifles efforts to combat AIDS and TB	http://infoweb.newsbank.com/resources/doc/nb/news/11942DE39247F268?p=AWNB	Jim Landers	2007-05-20	No	Develop
Dallas Morning News	HIV Resistance	Kids with HIV living longer with antiretroviral drugs	http://infoweb.newsbank.com/resources/doc/nb/news/1343F9508269D7F8?p=AWNB	Sherry Jacobson	2010-12-20	No	Develop
Dallas Morning News	HIV Resistance	Healthy appreciation	http://infoweb.newsbank.com/resources/doc/nb/news/13F545FC2C3D1E78?p=AWNB	Jim Landers	2012-06-10	No
Denver Post	HIV Resistance	AIDS report blurs focus of problem, experts say	http://infoweb.newsbank.com/resources/doc/nb/news/0EB1D20BB1CC0905?p=AWNB	Judith Brimberg	1993-02-06	No	Develop
Denver Post	HIV Resistance	New drugs curb HIV, stimulate immune system	http://infoweb.newsbank.com/resources/doc/nb/news/0EAF4443A0592799?p=AWNB	Gina Kolata	1995-01-29	No	Develop, Mutate
Denver Post	HIV Resistance	AIDS arsenal gets new weapons	http://infoweb.newsbank.com/resources/doc/nb/news/0EAF447401B404AC?p=AWNB	Lauran Neergaard	1995-11-05	No	Develop
Denver Post	HIV Resistance	New AIDS drug deserves approval, agency hears	http://infoweb.newsbank.com/resources/doc/nb/news/0EAF447479AE0724?p=AWNB	Associated Press	1995-11-07	No	Develop
Denver Post	HIV Resistance	FDA approves first of new AIDS drugs	http://infoweb.newsbank.com/resources/doc/nb/news/0EAF4479CFC6DAD9?p=AWNB	Marlene Cimons	1995-12-08	No	Develop, Mutate
Denver Post	HIV Resistance	Scientists find molecule that thwarts HIV infection	http://infoweb.newsbank.com/resources/doc/nb/news/0EAF887649F3CAF4?p=AWNB	Paul Recer	1997-10-24	No	Develop
Denver Post	HIV Resistance	New AIDS drug cheaper, more effective in combo	http://infoweb.newsbank.com/resources/doc/nb/news/0EAF44C6402A2E30?p=AWNB	Thomas H. Maugh II	1998-02-06	No	Develop, Mutate
Denver Post	HIV Resistance	New class of AIDS drugs gets a mixed report card	http://infoweb.newsbank.com/resources/doc/nb/news/0EAF44DC7A0B35A6?p=AWNB	Katherine Vogt	1998-05-31	No	Mutate, Develop
Denver Post	HIV Resistance	HIV evolving, resisting drugs Virus becoming tougher to conquer	http://infoweb.newsbank.com/resources/doc/nb/news/0EAF4514BA39B172?p=AWNB	Laurie Garrett	1999-02-04	Yes	Develop, Mutate
Denver Post	HIV Resistance	Progress reported in hepatitis fight AIDS research may help eradicate viruses	http://infoweb.newsbank.com/resources/doc/nb/news/0EAF4561F92F9A73?p=AWNB	Justin Gillis	2000-02-07	No	Develop
Denver Post	HIV Resistance	AIDS: U.S. at 'end of the beginning' of epidemic HIV spreading among the poor	http://infoweb.newsbank.com/resources/doc/nb/news/0EC6FF3FDD1F2378?p=AWNB	Sheryl Gay Stolberg	2001-06-03	No	Develop
Denver Post	HIV Resistance	EDITORIAL From crisis to catastrophe	http://infoweb.newsbank.com/resources/doc/nb/news/0EC9EE43C51DEA6A?p=AWNB	N/A	2001-06-10	No	Mutate
Denver Post	HIV Resistance	AIDS decline in U.S. appears to be ending	http://infoweb.newsbank.com/resources/doc/nb/news/0EDE72384056F354?p=AWNB	Susan Okie	2001-08-14	No
Denver Post	HIV Resistance	Study examines AIDS drugs What happens if patients stop taking them?	http://infoweb.newsbank.com/resources/doc/nb/news/0F0F8ECBE6A3BF2C?p=AWNB	Karen Auge	2002-01-10	No
Denver Post	HIV Resistance	New AIDS drug offers hope Boulder-made 'T-20' blocks virus; FDA approval still needed	http://infoweb.newsbank.com/resources/doc/nb/news/0F3BB9BA0F5ED075?p=AWNB	Marsha Austin	2002-05-24	No	Develop
Denver Post	HIV Resistance	EDITORIAL - New drug, same crisis	http://infoweb.newsbank.com/resources/doc/nb/news/0FB974F240D5A9E8?p=AWNB	N/A	2003-06-06	No	Develop
Denver Post	HIV Resistance	Thabo Mbeki's change of heart	http://infoweb.newsbank.com/resources/doc/nb/news/0FF2D58A8DB7DE61?p=AWNB	Pius Kamau	2003-11-26	No
Denver Post	HIV Resistance	Denver sheriff signs deal to help pay for HIV drugs for jail inmates	http://infoweb.newsbank.com/resources/doc/nb/news/155626B00AEFBA78?p=AWNB	Noelle Phillips	2015-05-13	No	Develop
Houston Chronicle	HIV Resistance	Study finds mutants of AIDS virus resistant to use of AZT	http://infoweb.newsbank.com/resources/doc/nb/news/0ED7AEEB237AEA58?p=AWNB	Associated Press	1989-03-15	No	Develop, Mutate
Houston Chronicle	HIV Resistance	Researchers hopeful for new drug in fight against AIDS	http://infoweb.newsbank.com/resources/doc/nb/news/0ED7AF4093B2BE66?p=AWNB	Associated Press	1989-07-28	No	Develop
Houston Chronicle	HIV Resistance	Key drug urged early for AIDS patients	http://infoweb.newsbank.com/resources/doc/nb/news/0ED7B011196B7452?p=AWNB	Ruth Sorelle	1990-06-23	No
Houston Chronicle	HIV Resistance	Study finds AZT can't lengthen life - No benefit found in early treatment	http://infoweb.newsbank.com/resources/doc/nb/news/0ED7B183E39CD71F?p=AWNB	Houston Chronicle News Services	1992-02-13	No	Develop
Houston Chronicle	HIV Resistance	AIDS drug DDC shown to augment benefits of AZT	http://infoweb.newsbank.com/resources/doc/nb/news/0ED7B1B00B684111?p=AWNB	Marlene Cimons	1992-04-21	No	Develop
Houston Chronicle	HIV Resistance	Physicians report cases of new AIDS-like illness	http://infoweb.newsbank.com/resources/doc/nb/news/0ED7B1EBD118F04C?p=AWNB	Ruth Sorelle	1992-07-22	No
Houston Chronicle	HIV Resistance	80 AIDS patients sought for drug tests	http://infoweb.newsbank.com/resources/doc/nb/news/0ED7B27D6621FA32?p=AWNB	Associated Press	1993-03-24	No	Mutate
Houston Chronicle	HIV Resistance	AIDS Drugs: Does haste make waste? - U.S. effort to speed approval of treatment creating shaky science, European scientists say	http://infoweb.newsbank.com/resources/doc/nb/news/0ED7B28D6D7660ED?p=AWNB	Lawrence K. Altman M.D.	1993-04-19	No	Develop
Houston Chronicle	HIV Resistance	Teens facing AIDS wildfire, experts warn	http://infoweb.newsbank.com/resources/doc/nb/news/0ED7B2A93B448DEC?p=AWNB	Ruth Sorelle	1993-06-06	No	Develop
Houston Chronicle	HIV Resistance	AZT benefits called transient - Surveys' doubts on AIDS drug spur confusion at meeting	http://infoweb.newsbank.com/resources/doc/nb/news/0ED7B2AA1FF872FC?p=AWNB	Ruth Sorelle	1993-06-07	No	Develop
Houston Chronicle	HIV Resistance	Panel recommends restraint in prescribing AZT drug	http://infoweb.newsbank.com/resources/doc/nb/news/0ED7B2B64F9C0CD8?p=AWNB	Marlene Cimons	1993-06-27	No	Develop
Houston Chronicle	HIV Resistance	Researchers discover flaw in studies that touted new treatment for AIDS	http://infoweb.newsbank.com/resources/doc/nb/news/0ED7B2C422F2E226?p=AWNB	Lawrence K. Altman	1993-07-22	No	Develop, Emerge
Houston Chronicle	HIV Resistance	Mutations may thwart AIDS drug	http://infoweb.newsbank.com/resources/doc/nb/news/0ED7B33CCCFA1A78?p=AWNB	Knight-Ridder Newspapers	1994-02-25	No	Mutate, Develop
Houston Chronicle	HIV Resistance	New drug for AIDS is endorsed	http://infoweb.newsbank.com/resources/doc/nb/news/0ED7B36ED3D2F516?p=AWNB	Lauran Neergaard	1994-05-21	No	Mutate
Houston Chronicle	HIV Resistance	Studies provide new model of how HIV wins its battle	http://infoweb.newsbank.com/resources/doc/nb/news/0ED7B4254D89D586?p=AWNB	Houston Chronicle News Services	1995-01-12	No	Develop, Mutate
Houston Chronicle	HIV Resistance	New class of drugs battles AIDS early	http://infoweb.newsbank.com/resources/doc/nb/news/0ED7B42F33072038?p=AWNB	Gina Kolata	1995-01-29	No	Develop, Mutate
Houston Chronicle	HIV Resistance	FDA to consider new AIDS drug/New type of medicines viewed as best yet at stalling HIV	http://infoweb.newsbank.com/resources/doc/nb/news/0ED7B4D1840ECDC7?p=AWNB	Associated Press	1995-11-05	No	Develop
Houston Chronicle	HIV Resistance	New drug for AIDS wins prais	http://infoweb.newsbank.com/resources/doc/nb/news/0ED7B4D2CED04A02?p=AWNB	Associated Press	1995-11-07	No	Develop
Houston Chronicle	HIV Resistance	Advisers urge FDA to approve first in new class of AIDS drugs	http://infoweb.newsbank.com/resources/doc/nb/news/0ED7B4D339F0103A?p=AWNB	John Schwartz	1995-11-08	No	Develop, Mutate
Houston Chronicle	HIV Resistance	Researcher sees hope in multiple-drug AIDS treatments	http://infoweb.newsbank.com/resources/doc/nb/news/0ED7B563B7C40747?p=AWNB	Ruth Sorelle	1996-07-09	No	Develop, Emerge, Mutate
Houston Chronicle	HIV Resistance	TRIPLE PLAY ON HIV/Drug combinations may ward off AIDS virus, but doctors still don't want to use the word `cure'	http://infoweb.newsbank.com/resources/doc/nb/news/0ED7B587B78B5198?p=AWNB	Ruth Sorelle	1996-09-09	No	Develop
Houston Chronicle	HIV Resistance	Use of one drug canNot effectively treat AIDS, experts say	http://infoweb.newsbank.com/resources/doc/nb/news/0ED7B814B1CE0007?p=AWNB	Ruth Sorelle	1997-01-26	No	Develop
Houston Chronicle	HIV Resistance	Magic responding to HIV treatment	http://infoweb.newsbank.com/resources/doc/nb/news/0ED7B83CCA8FA6DB?p=AWNB	Houston Chronicle News Services	1997-04-05	No	Develop
Houston Chronicle	HIV Resistance	Early attack on HIV to be endorsed/Guidelines support three-drug regimen	http://infoweb.newsbank.com/resources/doc/nb/news/0ED7B869B50396EE?p=AWNB	Marlene Cimons	1997-06-19	No	Develop
Houston Chronicle	HIV Resistance	HIV has an enemy: It's aNother virus / Therapy targets, kills cells leading to AIDS	http://infoweb.newsbank.com/resources/doc/nb/news/0ED7B89D050136A8?p=AWNB	Nicholas Wade	1997-09-05	No	Develop
Houston Chronicle	HIV Resistance	Drug may slash price of treating AIDS /Hydroxyurea test results hailed	http://infoweb.newsbank.com/resources/doc/nb/news/0ED7B91B628C157A?p=AWNB	Thomas H. Maugh II	1998-02-06	No	Develop, Mutate
Houston Chronicle	HIV Resistance	Treatment crucial to prevent resistant strains of HIV	http://infoweb.newsbank.com/resources/doc/nb/news/0ED7B978391634CD?p=AWNB	Ruth Sorelle	1998-07-01	No	Emerge
Houston Chronicle	HIV Resistance	Study: Anti-HIV drug can prevent mothers from infecting babies	http://infoweb.newsbank.com/resources/doc/nb/news/0ED7BA8EBA0F66E9?p=AWNB	Maggie Fox, Leigh Hopper,	1999-07-15	No	Develop
Houston Chronicle	HIV Resistance	Studies find increase in drug-resistant HIV	http://infoweb.newsbank.com/resources/doc/nb/news/0ED7BABB6F893815?p=AWNB	Associated Press	1999-09-22	No	Develop
Houston Chronicle	HIV Resistance	Call repeated for S. Africa to provide AIDS drugs to mothers	http://infoweb.newsbank.com/resources/doc/nb/news/0EB4884D56345835?p=AWNB	Leigh Hopper	2000-07-13	No	Develop
Houston Chronicle	HIV Resistance	Patent dispute threatens AIDS treatment in Brazi	http://infoweb.newsbank.com/resources/doc/nb/news/0EB485850B94ED37?p=AWNB	Michael Astor	2001-02-21	No	Develop
Houston Chronicle	HIV Resistance	A NEW CLASS OF DRUGS HAS MADE THE DISEASE MORE MANAGEABLE, BUT AIDS IS STILL A THREAT WORLDWIDE AIDS at 20	http://infoweb.newsbank.com/resources/doc/nb/news/0ECC8AA1915F7ABD?p=AWNB	Todd Ackerman	2001-06-03	No	Develop, Mutate
Houston Chronicle	HIV Resistance	Drug resistance rise foreseen HIV infections expected to jump in San Francisco	http://infoweb.newsbank.com/resources/doc/nb/news/0EE49DD898360E23?p=AWNB	Associated Press	2001-09-01	No	Develop
Houston Chronicle	HIV Resistance	Drug-resistance testing enhances AIDS arsenal Medicaid program in Texas doesn't cover procedur	http://infoweb.newsbank.com/resources/doc/nb/news/0F2F03AA5E37BB64?p=AWNB	Todd Ackerman	2002-04-15	Yes	Mutate
Houston Chronicle	HIV Resistance	LESS GUESSWORK Texas should pay for AIDS drug resistance testing	http://infoweb.newsbank.com/resources/doc/nb/news/0F30AF7180D58440?p=AWNB	Staff	2002-04-20	No	Develop, Mutate
Houston Chronicle	HIV Resistance	New drugs show promise in fighting AIDS	http://infoweb.newsbank.com/resources/doc/nb/news/0F94C2E759524028?p=AWNB	Los Angeles Times	2003-02-18	No	Develop
Houston Chronicle	HIV Resistance	Taylor High grad learns life's lessons as student assigned to African village	http://infoweb.newsbank.com/resources/doc/nb/news/0FD101F00EEAAD6E?p=AWNB	Sandra Meikene	2003-08-07	No	Develop
Houston Chronicle	HIV Resistance	Study finds African AIDS patients show zeal in pill regimens	http://infoweb.newsbank.com/resources/doc/nb/news/0FD6F182B0EA5F88?p=AWNB	DONALD G. McNEIL Jr.	2003-09-07	No	Mutate
Houston Chronicle	HIV Resistance	TaNox stock leaps as HIV drug on move - FDA to quickly review results of clinical trials	http://infoweb.newsbank.com/resources/doc/nb/news/0FE1D1811E8369C3?p=AWNB	DARRIN SCHLEGEL	2003-10-10	No	Develop
Houston Chronicle	HIV Resistance	3-drug HIV cocktail proves the best - Study says combination works longer, suppresses virus faster	http://infoweb.newsbank.com/resources/doc/nb/news/0FF643F6B09FA8E9?p=AWNB	LINDA A. JOHNSON	2003-12-11	No	Mutate
Houston Chronicle	HIV Resistance	HIV drug saving youngest South Africans - Nevirapine preventing transmittal of virus to babies	http://infoweb.newsbank.com/resources/doc/nb/news/10323CE2AF3C0EEB?p=AWNB	CRAIG TIMBERG	2004-06-10	No
Houston Chronicle	HIV Resistance	HIGH-STAKES MEDICINE, TaNox pursues a healthier future - As HIV drug shows promise, local company enjoys attention	http://infoweb.newsbank.com/resources/doc/nb/news/10708B615B28E328?p=AWNB	ANNE BELLI, Staff	2004-12-15	No	Develop
Houston Chronicle	HIV Resistance	Uninterrupted drugs advised in HIV therapy - The strategy of cycling patients on, off medication falls into disfavor	http://infoweb.newsbank.com/resources/doc/nb/news/11617BB00F859E18?p=AWNB	JIA-RUI CHONG	2006-12-17	No
Houston Chronicle	HIV Resistance	THE AIDS CRISIS - AIDS stigma rampant in Mexico - World conference highlights patients who report discrimination from doctors	http://infoweb.newsbank.com/resources/doc/nb/news/1225E8E94B12CB08?p=AWNB	MARION LLOYD	2008-08-03	No	Develop
Houston Chronicle	HIV Resistance	FDA panel backs first pill to block HIV	http://infoweb.newsbank.com/resources/doc/nb/news/13EBC27A5F66F4A8?p=AWNB	ASSOCIATED PRESS	2012-05-11	No	Develop
Los Angeles Investors Business Daily	HIV Resistance	California Biotech Sees Diversity As Good Growth Tonic	http://www.lexisnexis.com/lnacui2api/api/version1/getDocCui?lni=45N9-CXP0-003M-X4SC&csi=8204&hl=t&hv=t&hnsd=f&hns=t&hgn=t&oc=00240&perma=true	GLORIA LAU	2002-04-23	No	Develop
Los Angeles Investors Business Daily	HIV Resistance	Biotech Turns Corner With First-Ever Profit	http://www.lexisnexis.com/lnacui2api/api/version1/getDocCui?lni=472J-0XT0-01J8-W26P&csi=8204&hl=t&hv=t&hnsd=f&hns=t&hgn=t&oc=00240&perma=true	MARILYN ALVA	2002-10-24	No	Develop
Los Angeles Investors Business Daily	HIV Resistance	Drug Maker Prepares For Tough Showdown	http://www.lexisnexis.com/lnacui2api/api/version1/getDocCui?lni=497Y-TX70-01J8-W1XP&csi=8204&hl=t&hv=t&hnsd=f&hns=t&hgn=t&oc=00240&perma=true	GLORIA LAU	2003-08-08	No	Mutate
Los Angeles Investors Business Daily	HIV Resistance	New Class Of Drugs Targets HIV Patients With Limited Options; Merck, Gilead Lead The Way; Second-line treatments are sought as HIV becomes more resistant to drugs	http://www.lexisnexis.com/lnacui2api/api/version1/getDocCui?lni=4JBM-RJC0-TX4P-W3D6&csi=8204&hl=t&hv=t&hnsd=f&hns=t&hgn=t&oc=00240&perma=true	GLORIA LAU	2006-02-27	No	Mutate
Los Angeles Investors Business Daily	HIV Resistance	Big Pharma Makes Big Push Into HIV Drugs; HIV treatment market expanding at rapid clip, so giants are moving in	http://www.lexisnexis.com/lnacui2api/api/version1/getDocCui?lni=4TTM-07Y0-TX4P-W00H&csi=8204&hl=t&hv=t&hnsd=f&hns=t&hgn=t&oc=00240&perma=true	Investor's Business Daily	2008-11-03	No	Develop, Mutate
Los Angeles Times	HIV Resistance	HEALTH AIDS Strains May Be Resisting AZT: [P.M. Final Edition]	http://search.proquest.com/latimes/docview/280680845/fulltext/ED01F071DD9B45CDPQ/203?accountid=14512	N/A	1989-03-14	No	Develop
Los Angeles Times	HIV Resistance	Federal Panel Favors Early Use of AIDS Drug	http://search.proquest.com/latimes/docview/280902469/fulltext/ED01F071DD9B45CDPQ/217?accountid=14512	CIMONS, MARLENE	1990-01-31	No	Develop
Los Angeles Times	HIV Resistance	Quick Approval Sought for AIDS Drugs Medicine: Health workers ask FDA to speed up bureaucratic process and make two promising treatments available.	http://search.proquest.com/latimes/docview/281250104/fulltext/ED01F071DD9B45CDPQ/190?accountid=14512	N/A	1990-12-29	No	Develop
Los Angeles Times	HIV Resistance	Panel Urges FDA to Allow New AIDS Drug on Market: [Home Edition]	http://search.proquest.com/latimes/docview/281384119/fulltext/FB9060AA8A74A5DPQ/1?accountid=14512	CIMONS, MARLENE	1991-07-20	No	Develop
Los Angeles Times	HIV Resistance	Study Doubts Early AZT Use Prolongs Life	http://search.proquest.com/latimes/docview/281662400/fulltext/ED01F071DD9B45CDPQ/199?accountid=14512	Steinbrook, Robert	1992-02-13	No	Develop
Los Angeles Times	HIV Resistance	AZT May Help in Early HIV Stages, Study Shows AIDS: Drug appears to stall loss of key CD4 cells. Results are preliminary and conflict with a recent U.S. study, experts say.: [Home Edition]	http://search.proquest.com/latimes/docview/281647593/59E0096C7F1442CBPQ/1?accountid=14512	Steinbrook, Rober	1992-02-18	No	Develop
Los Angeles Times	HIV Resistance	3rd Major Drug for AIDS May Win Early OK: [Home Edition]	http://search.proquest.com/latimes/docview/281630409/fulltext/3F4B4621520746A4PQ/291?accountid=14512	CIMONS, MARLENE	1992-04-21	No	Develop
Los Angeles Times	HIV Resistance	Studies Find AIDS Virus `Hides' in Lymph System	http://search.proquest.com/latimes/docview/281977703/fulltext/6718242AF734F31PQ/131?accountid=14512	Stolberg, Sheryl	1993-03-25	No	Develop
Los Angeles Times	HIV Resistance	15 Drug Firms AnNounce Alliance on AIDS Research: The pharmaceutical giants will cooperate in seeking the most effective way to combine new therapies.	http://search.proquest.com/latimes/docview/282006979/6718242AF734F31PQ/118?accountid=14512	N/A	1993-04-20	No	Develop, Mutate
Los Angeles Times	HIV Resistance	TOXIC HOPE WIDELY EMBRACED, THE AIDS DRUG IS NoW UNDER HEAVY FIRE. THE AZT STORY	http://search.proquest.com/latimes/docview/282025787/6718242AF734F31PQ/115?accountid=14512	Marsa, Linda	1993-06-20	No	Develop
Los Angeles Times	HIV Resistance	Federal Panel Pushes New AIDS Drug Strategy	http://search.proquest.com/latimes/docview/282041309/ED01F071DD9B45CDPQ/163?accountid=14512	CIMONS, MARLENE	1993-06-27	No	Develop
Los Angeles Times	HIV Resistance	COLUMN ONE Seeking a Cure: Faith, Frustration Once researchers found the virus that causes AIDS, they were sure they could soon stop the disease. `Find the bug, find the drug,' they said. A decade later, they are empty-handed and thinking of starting over. Series: AIDS RESEARCH: WHAT WENT WRONG? The quest for a 'magic bullet' is chosen over basic research	http://search.proquest.com/latimes/docview/282391381/fulltext/ED01F071DD9B45CDPQ/202?accountid=14512	Stolberg, Sheryl	1994-08-07	No	Develop
Los Angeles Times	HIV Resistance	HIV Researchers Struggle to Hit Their Moving Target Disease: The virus frustrates scientists with its ability to Mutate and hide for long periods in a host's genes. Series: AIDS RESEARCH: WHAT WENT WRONG? How a diabolical virus has eluded the world's scientists. Second in a series: [Home Edition]	http://search.proquest.com/latimes/docview/282256876/CE602B98C4694BEBPQ/1?accountid=14512	MAUGH, THOMAS H,	1994-08-08	No	Develop, Mutate
Los Angeles Times	HIV Resistance	Study Finds Patients' Bodies in Constant Battle With HIV: [Home Edition]	http://search.proquest.com/latimes/docview/292980698/FE787398A5844A77PQ/1?accountid=14512	n/a	1995-01-12	Yes	Develop
Los Angeles Times	HIV Resistance	New Drugs Offer Hope in Battle Against AIDS Health: Preliminary trials of protease inhibitors show that they are 10 to 20 times as powerful as AZT	http://search.proquest.com/latimes/docview/293013711/fulltext/6718242AF734F31PQ/132?accountid=14512	CIMONS, MARLENE; MAUGH, THOMAS H, II	1995-02-01	No	Develop, Mutate
Los Angeles Times	HIV Resistance	New Strategies Fuel Optimism in AIDS Fight	http://search.proquest.com/latimes/docview/292999666/fulltext/ED01F071DD9B45CDPQ/201?accountid=14512	CIMONS, MARLENE; MAUGH, THOMAS H, II	1995-02-20	No	Develop, Mutate
Los Angeles Times	HIV Resistance	Antiviral Cocktail: The Toast of AIDS Researchers Medicine: Experts at Costa Mesa conference believe attacking HIV with three drugs simultaneously will keep it from replicating and add years to patients' lives.: [Orange County Edition]	http://search.proquest.com/latimes/docview/292985201/7324FEDB188246BFPQ/1?accountid=14512	Marquis, Julie	1995-03-14	No	Mutate
Los Angeles Times	HIV Resistance	New AIDS Drug to Be Offered Via Lottery Health: About 2,000 patients in advanced stages of illness will receive promising but still experimental Invirase	http://search.proquest.com/latimes/docview/293076606/ED01F071DD9B45CDPQ/136?accountid=14512	N/A	1995-06-22	No
Los Angeles Times	HIV Resistance	New Anti-AIDS Drugs Win FDA Panel's Backing	http://search.proquest.com/latimes/docview/293191623/fulltext/6718242AF734F31PQ/130?accountid=14512	CIMONS, MARLENE	1995-11-08	No	Develop
Los Angeles Times	HIV Resistance	FDA OKs First of New Batch of AIDS Drugs: [Southland Edition]	http://search.proquest.com/latimes/docview/293236862/fulltext/3F4B4621520746A4PQ/295?accountid=14512	Cimons, Marlene	1995-12-08	No	Develop, Mutate
Los Angeles Times	HIV Resistance	Potent New Weapon; Scientists say a new class of drugs called protease inhibitors could 'fundamentally change the landscape' of treating AIDS.; SCIENCE FILE: An exploration of issues and trends affecting science, medicine and the environment.: [Home Edition]	http://search.proquest.com/latimes/docview/293222733/3F4B4621520746A4PQ/231?accountid=14512	CIMONS, MARLENE.	1995-12-14	No	Develop, Mutate
Los Angeles Times	HIV Resistance	AIDS Researchers Savor Gains in War Against Virus; Medicine: New drugs, better tests are cause for cautious, but unparalleled, optimism among specialists.: [Home Edition]	http://search.proquest.com/latimes/docview/293183743/3F4B4621520746A4PQ/228?accountid=14512	CIMONS, MARLENE	1996-02-02	No	Mutate, Develop
Los Angeles Times	HIV Resistance	FDA Moves Quickly, OKs New Drug to Fight AIDS; Medicine: Agency also licenses ritonavir for use in early stages of infection. Action exceeds recommendation.: [Home Edition]	http://search.proquest.com/latimes/docview/293366517/fulltext/3F4B4621520746A4PQ/288?accountid=14512	CIMONS, MARLENE.	1996-03-02	No	Develop, Mutate
Los Angeles Times	HIV Resistance	New AIDS Drug Therapies Could Check Epidemic	http://search.proquest.com/latimes/docview/293294467/6718242AF734F31PQ/117?accountid=14512	MAUGH, THOMAS H, II	1996-07-04	No	Develop, Emerge, Mutate
Los Angeles Times	HIV Resistance	AZT May Mute Benefits of New AIDS Therapy; Health: Patients who used older treatments have shown resistance to new combinations using protease inhibitors	http://search.proquest.com/latimes/docview/421183959/ED01F071DD9B45CDPQ/171?accountid=14512	Colker, David	1997-01-12	No	Mutate
Los Angeles Times	HIV Resistance	Shifting Fronts in the Battle Against AIDS	http://search.proquest.com/latimes/docview/421311295/fulltext/ED01F071DD9B45CDPQ/207?accountid=14512	Conway, Ann	1997-05-05	No	Develop
Los Angeles Times	HIV Resistance	Panel to Call for Triple-Drug Therapy for HIV; Health: Federal officials seek to reduce confusion among doctors. Report is expected to bolster efforts to close gaps in insurance coverage of treatment.: [Home Edition]	http://search.proquest.com/latimes/docview/421299275/B845D366D6F04D81PQ/1?accountid=14512	CIMONS, MARLENE	1997-06-19	No	Develop
Los Angeles Times	HIV Resistance	MEDICINE; Encouraging News From AIDS Front; Conference: Research supports the effectiveness of drug cocktails--if taken correctly.	http://search.proquest.com/latimes/docview/421169788/ED01F071DD9B45CDPQ/179?accountid=14512	N/A	1997-10-06	No	Develop
Los Angeles Times	HIV Resistance	Ivory Coast's HIV Patients Frustrated; Medicine: They were once optimistic about joining a U.N. program offering newest drugs. Now, the uneducated and the poor find out that treatment is out of reach.: [Bulldog Edition]	http://search.proquest.com/news/docview/421357520/F7B5501F17934656PQ/1?accountid=14512	DADSON, AMBA	1997-12-28	No	Develop
Los Angeles Times	HIV Resistance	An exploration of issues and trends affecting science, medicine and the environment; Q & A; The Next Step in AIDS Research	http://search.proquest.com/latimes/docview/421420168/6718242AF734F31PQ/119?accountid=14512	MAUGH, THOMAS H, II	1998-02-12	No	Develop
Los Angeles Times	HIV Resistance	Transmission of Drug-Resistant HIV Reported: [Home Edition]	http://search.proquest.com/news/docview/421479039/E7418AD04A60416EPQ/1?accountid=14512	MAUGH, THOMAS H	1998-07-01	No	Develop, Mutate
Los Angeles Times	HIV Resistance	California and the West; Tracing AIDS to Its Last Hiding Place; Health: Scientists are trying to find ways to attack the virus in lymph Nodes, tonsils and gastrointestinal system.	http://search.proquest.com/latimes/docview/421422679/6718242AF734F31PQ/114?accountid=14512	MAUGH, THOMAS H, II	1998-07-02	No
Los Angeles Times	HIV Resistance	Specter of Drug Resistance Haunts Many Being Treated for AIDS; Health: In up to 60% of patients, medicine cocktails fail to suppress HIV entirely, allowing virus to rebound.: [Bulldog Edition]	http://ucelinks.cdlib.org:8888/sfx_local?url_ver=Z39.88-2004&rft_val_fmt=info:ofi/fmt:kev:mtx:journal&genre=unkNown&sid=ProQ:ProQ%3Alatimes&atitle=Specter+of+Drug+Resistance+Haunts+Many+Being+Treated+for+AIDS%3B+Health%3A+In+up+to+60%25+of+patients%2C+medicine+cocktails+fail+to+suppress+HIV+entirely%2C+allowing+virus+to+rebound.%3A+%5BBulldog+Edition%5D&title=Los+Angeles+Times&issn=04583035&date=…	Haney, Daniel	1998-08-30	No	Mutate
Los Angeles Times	HIV Resistance	SATURDAY JOURNAL; A Parent's Dread; Learning she was pregnant set off months of anguish for a woman with AIDS and her husband	http://search.proquest.com/latimes/docview/421368591/ED01F071DD9B45CDPQ/156?accountid=14512	ZAMICHOW, NoRA	1998-10-17	No	Develop
Los Angeles Times	HIV Resistance	New Class of Anti-HIV Drugs Shows Promise: [Home Edition]	http://search.proquest.com/news/docview/421593981/3B947881A0574A5EPQ/1?accountid=14512	MAUGH, THOMAS H	2000-02-01	No	Develop
Los Angeles Times	HIV Resistance	HIV Crossed to Humans 70 Years Ago, Analysis Says; Disease: Date of infection from chimps is much earlier than had been thought. Finding could help vaccine quest.: [Home Edition]	http://search.proquest.com/news/docview/421456006/9FAC10E581244BFBPQ/1?accountid=14512	MAUGH, THOMAS H	2000-02-02	No	Develop, Mutate
Los Angeles Times	HIV Resistance	Mercy Smugglers' Help Alleviate AIDS in Mexico; Medicine: Millions of dollars worth of drugs are transported illegally from the U.S. to assist sufferers	http://search.proquest.com/latimes/docview/421544719/ED01F071DD9B45CDPQ/154?accountid=14512	Mena, Jennifer	2000-09-16	No	Develop
Los Angeles Times	HIV Resistance	Sharp Drops in AIDS May Be Over	http://search.proquest.com/latimes/docview/421825383/6718242AF734F31PQ/124?accountid=14512	Ornstein, Charles	2001-08-14	No
Los Angeles Times	HIV Resistance	FDA Approves Gene-Based Test for HIV Patients: [Home Edition]	http://search.proquest.com/latimes/docview/421830366/453BBE5BE5814E30PQ/1?accountid=14512	n/a	2001-09-28	Yes	Mutate
Los Angeles Times	HIV Resistance	Commentary; Overcoming Denial Is a Victory Over AIDS	http://search.proquest.com/latimes/docview/421847049/ED01F071DD9B45CDPQ/140?accountid=14512	Rotello, Gabriel	2001-12-03	No	Mutate
Los Angeles Times	HIV Resistance	New AIDS Drugs Still a Distant Glimmer; Research: With current therapies bedeviled by serious side effects and growing viral resistance, hopes are fading for a quick breakthrough.: [Home Edition]	http://search.proquest.com/latimes/docview/421686925/7003E58F39844151PQ/1?accountid=14512	MAUGH, THOMAS H	2002-03-11	No	Develop, Mutate
Los Angeles Times	HIV Resistance	THE WORLD; Drug Resistance Complicates HIV Therapy; Health: ANother study, ahead of a conference on the epidemic, finds such infections can be safely treated in those who also have hepatitis C.: [HOME EDITION	http://search.proquest.com/latimes/docview/421878993/4DCC8FAE24B7430CPQ/1?accountid=14512	MAUGH, THOMAS H,	2002-07-07	No
Los Angeles Times	HIV Resistance	Science File; IN BRIEF; African HIV Quick to Resist Drugs, Study Says: [HOME EDITION]	http://search.proquest.com/latimes/docview/421731504/CF1CD51B5FA46B3PQ/1?accountid=14512	n/a	2002-07-08	No	Develop
Los Angeles Times	HIV Resistance	AIDS TREATMENT; The Patients' Side of the Story: [HOME EDITION]	http://search.proquest.com/latimes/docview/421737017/BAA37CA99216432CPQ/1?accountid=14512	Gottlieb, Scott	2002-07-14	No	Develop, Mutate
Los Angeles Times	HIV Resistance	New AIDS Drug Will Be Free to Some Patients; HIV* Hundreds in U.S. who have a resistance to existing therapies will be eligible for Fuzeon under the FDA's 'compassionate use' program.: [HOME EDITION]	http://search.proquest.com/latimes/docview/421731679/4DCC8FAE24B7430CPQ/2?accountid=14512	Marsa, Linda	2002-09-16	No	Develop
Los Angeles Times	HIV Resistance	The Nation; AIDS Researchers Optimistic About New Medications; More- powerful and longer-lasting drugs lead to more people sticking to regimens, they say.: [HOME EDITION]	http://search.proquest.com/latimes/docview/421775846/79EA3C716BF74C72PQ/1?accountid=14512	Maugh, Thomas H	2003-02-18	No	Develop
Los Angeles Times	HIV Resistance	Gilead Wins OK for Its 2nd Anti-HIV Drug; FDA approval paves the way for the company to eventually combine both into a single pill.: [HOME EDITION]	http://search.proquest.com/latimes/docview/421819160/D419D65B27734A20PQ/1?accountid=14512	Gellene, Denise	2003-07-03	No	Develop
Los Angeles Times	HIV Resistance	THE WORLD; An Epidemic Built on IgNorance; Haiti's AIDS crisis rages on, fueled by superstition and prejudice. Political divisions limit access to lifesaving medications	http://search.proquest.com/latimes/docview/421902327/fulltext/ED01F071DD9B45CDPQ/200?accountid=14512	Williams, Carol J	2004-01-29	No	Develop
Los Angeles Times	HIV Resistance	California; Gilead, Glaxo Pills for HIV Approved: [HOME EDITION]	http://search.proquest.com/latimes/docview/421907047/AEEA0580AC814FA3PQ/1?accountid=14512	n/a	2004-08-03	No	Develop
Los Angeles Times	HIV Resistance	PUBLIC HEALTH; Unveiling Secrets; HIV testing is vital to South Africa, but it's shaking families: [HOME EDITION]	http://search.proquest.com/latimes/docview/421933792/71570A0F76E74AF5PQ/1?accountid=14512	Foster, Douglas	2004-08-22	No	Develop
Los Angeles Times	HIV Resistance	The Nation; AIDS Goals Within Reach; Efforts to treat more people are on schedule, health officials say, but more money is needed	http://search.proquest.com/latimes/docview/421941688/ED01F071DD9B45CDPQ/159?accountid=14512	Maugh, Thomas H, II.	2005-01-27	No	Develop
Los Angeles Times	HIV Resistance	THE NATION; Experts Divided on Implications of N.Y. AIDS Case; Some say the alarm over a drug-resistant 'super-strain' of HIV may be premature.: [HOME EDITION]	http://search.proquest.com/latimes/docview/421970813/9AEFFC51995848E9PQ/1?accountid=14512	Thomas H. Maugh	2005-02-16	Yes
Los Angeles Times	HIV Resistance	AIDS Patients See Life, Death Issues in Trade Pact: [HOME EDITION]	http://search.proquest.com/latimes/docview/421987070/6FBBEFA43EA747A3PQ/1?accountid=14512	Marla Dickerson and Evelyn Iritani	2005-04-22	No	Develop
Los Angeles Times	HIV Resistance	AIDS pill as party drug?; Some HIV-negative men are using teNofovir instead of condoms, hoping it provides protection. Physicians say the practice could lead to more infections.: [HOME EDITION]	http://search.proquest.com/latimes/docview/422021967/FB8C0BA103E04494PQ/1?accountid=14512	Costello, Daniel.	2005-12-19	No
Los Angeles Times	HIV Resistance	COLUMN ONE; The Ones HIV Left in Limbo; Salvage therapy is the last resort of a largely unkNown and unlucky miNority who began treatment before multidrug 'cocktails.': [HOME EDITION]	http://search.proquest.com/latimes/docview/422026090/106CE55252854281PQ/1?accountid=14512	Ricci, James	2006-01-19	No	Develop, Mutate
Los Angeles Times	HIV Resistance	AIDS AT 25; A War of Attrition With Virus; With hope for a vaccine fading and research at a stalemate, it's Now a battle to get drugs to the most vulnerable groups.	http://search.proquest.com/latimes/docview/422076525/fulltext/6718242AF734F31PQ/129?accountid=14512	Thomas H. Maugh II and Jia-Rui Chong.	2006-06-05	No
Los Angeles Times	HIV Resistance	Africans Stick to AIDS Regimens Best, Study Says	http://search.proquest.com/latimes/docview/422208038/fulltext/ED01F071DD9B45CDPQ/213?accountid=14512	Cline, Erin	2006-08-09	No	Develop
Los Angeles Times	HIV Resistance	AIDS drug offers hope, but too late for one man	http://search.proquest.com/latimes/docview/422122186/fulltext/ED01F071DD9B45CDPQ/198?accountid=14512	Ricci, James	2007-01-02	No	Develop, Mutate
Los Angeles Times	HIV Resistance	Don't look away; The Invisible Cure Africa, the West, and the Fight Against AIDS Helen Epstein Farrar, Straus & Giroux: 326 pp., $26; 28 Stories of AIDS in Africa	http://search.proquest.com/latimes/docview/422146368/6718242AF734F31PQ/123?accountid=14512	Max, D T	2007-06-03	No	Develop
Los Angeles Times	HIV Resistance	FDA approves drug for resistant AIDS patients	http://search.proquest.com/latimes/docview/422222085/ABF371195D004D20PQ/1?accountid=14512	Jia-Rui, Chong	2007-08-07	No	Develop
Los Angeles Times	HIV Resistance	Panel backs AIDS drug; Isentress is found to benefit patients with resistant strains of HIV.: [HOME EDITION]	http://search.proquest.com/latimes/docview/422184224/F886A2D5AEFE439EPQ/1?accountid=14512	Jia-Rui, Chong	2007-09-06	No	Develop
Los Angeles Times	HIV Resistance	With HIV, growing older faster; Many gained years of life through drug 'cocktails,' but the ailments of aging are showing up earlier.	http://search.proquest.com/latimes/docview/422162957/260A0E3F695648C9PQ/1?accountid=14512	Engel, Mary	2008-02-05	No	Develop, Mutate
Los Angeles Times	HIV Resistance	Targeted shots; Large-scale trials of potential AIDS vaccines have come up short. A more focused approach is better.	http://search.proquest.com/latimes/docview/422213144/3F4B4621520746A4PQ/229?accountid=14512	N/A	2008-04-01	No	Develop
Los Angeles Times	HIV Resistance	HIV drugs to be tested as protection; Researchers are conducting trials to determine whether existing treatments can help block infections.	http://search.proquest.com/latimes/docview/422233231/B8483964669448C6PQ/1?accountid=14512	Maugh, Thomas H	2008-08-05	No	Develop
Los Angeles Times	HIV Resistance	Drug combos could slow breast cancer, studies say	http://search.proquest.com/latimes/docview/909198182/fulltext/3F4B4621520746A4PQ/282?accountid=14512	Roan, Shari.	2011-12-08	No	Develop
Los Angeles Times	HIV Resistance	THE NATION; FDA approves drug to reduce risk of HIV; But some fear the medication, Truvada, may encourage unprotected sex.	http://search.proquest.com/latimes/docview/1026017701/CB0BA91A7D5E40B5PQ/1?accountid=14512	Duncan, Ian.	2012-07-17	No	Develop
Los Angeles Times	HIV Resistance	Major HIV study backs early use of antiretroviral drugs	http://search.proquest.com/latimes/docview/1685130417/B9B2EAB7E9804E54PQ/1?accountid=14512	Kaplan, Karen	2015-06-03	No	Develop
Miami Herald	HIV Resistance	PROMISING EXPERIMENTAL AIDS DRUG A BUST	http://infoweb.newsbank.com/resources/doc/nb/news/0EB3453F9DC2E1E1?p=AWNB	ASSOCIATED PRESS	1991-12-01	No	Mutate
Miami Herald	HIV Resistance	MORE AIDS PATIENTS SHOWING EARLY RESISTANCE TO AZT DRUG	http://infoweb.newsbank.com/resources/doc/nb/news/0EB4CC5DB9EAEE2B?p=AWNB	ASSOCIATED PRESS	1993-01-01	No
Miami Herald	HIV Resistance	HIV DevelopS DRUG RESISTANCE AFTER EXPOSURE FINDINGS HIGHLIGHT THE VIRUS' RESILIENCY	http://infoweb.newsbank.com/resources/doc/nb/news/0EB4D1A9A8FBA1EB?p=AWNB	Associated Press	1995-04-06	No	Develop
Miami Herald	HIV Resistance	LOTTERY PLANNED TO DISTRIBUTE PROMISING AIDS DRUG TO PATIENTS	http://infoweb.newsbank.com/resources/doc/nb/news/0EB4D20E85BFD3C7?p=AWNB	ASSOCIATED PRESS	1995-06-22	No
Miami Herald	HIV Resistance	PAIRED DRUGS SHOW PROMISE WITH AIDS AZT AND 3TC SEEM TO UNDERMINE VIRUS	http://infoweb.newsbank.com/resources/doc/nb/news/0EB4D24CFA0934CF?p=AWNB	ASSOCIATED PRESS	1995-08-05	No	Develop
Miami Herald	HIV Resistance	FDA ASKED TO OK NEW INITIAL AIDS DRUG	http://infoweb.newsbank.com/resources/doc/nb/news/0EB4D2C002FBB295?p=AWNB	Associated Press	1995-11-07	No	Develop
Miami Herald	HIV Resistance	POWERFUL AIDS DRUG ON SALE SATURDAY FDA GIVES OK IN RECORD TIME	http://infoweb.newsbank.com/resources/doc/nb/news/0EB4D2EDF0D11833?p=AWNB	Associated Press	1995-12-08	No	Develop
Miami Herald	HIV Resistance	NEW AIDS DRUGS' AIM IS 'BUYING TIME MORE THAN A DOZEN DRUG-MAKERS ARE RACING TO MARKET PROTEASEINHIBITORS	http://infoweb.newsbank.com/resources/doc/nb/news/0EB4D2F4F67CAB3F?p=AWNB	SANDRA JACOBS	1995-12-11	No	Mutate
Miami Herald	HIV Resistance	AIDS RESEARCHERS CAUTIOUSLY OPTIMISTIC ON DRUGS	http://infoweb.newsbank.com/resources/doc/nb/news/0EB4D86F43B5ED3C?p=AWNB	STEPHEN SMITH	1997-09-11	No	Develop, Mutate
Miami Herald	HIV Resistance	NEW MOLECULE COULD HELP IN FIGHTING AIDS	http://infoweb.newsbank.com/resources/doc/nb/news/0EB4D8BD4554432D?p=AWNB	Associated Press	1997-10-26	No	Develop
Miami Herald	HIV Resistance	IN THE NATION	http://infoweb.newsbank.com/resources/doc/nb/news/0EB4D94A2C6B8423?p=AWNB	Herald Wire Services	1998-01-11	No	Develop
Miami Herald	HIV Resistance	Broward News	http://infoweb.newsbank.com/resources/doc/nb/news/0EB4DAD4B38D735E?p=AWNB	KAREN RAFINSKI	1998-08-16	No	Develop, Mutate
Miami Herald	HIV Resistance	FDA APPROVES AIDS DRUG AS TREATMENT FOR HEPATITIS B	http://infoweb.newsbank.com/resources/doc/nb/news/0EB4DBC1E9EF4238?p=AWNB	LAURAN NEERGAARD	1998-12-10	No	Develop
Miami Herald	HIV Resistance	MORE HIV PATIENTS ARE DevelopING VIRUS RESISTANT TO LATEST MEDICINE, STUDIES SAY	http://infoweb.newsbank.com/resources/doc/nb/news/0EB5D39D1073E16D?p=AWNB	BRENDA C. COLEMAN	1999-09-22	No	Develop
Miami Herald	HIV Resistance	AIDS THREATENS ANEW MUTANT VIRUS RESISTS DRUGS	http://infoweb.newsbank.com/resources/doc/nb/news/0EB5D39E77799689?p=AWNB	Herald Staff	1999-09-23	No	Develop, Mutate
Miami Herald	HIV Resistance	HIV REBOUND LINKED TO IRREGULAR DRUG DOSAGE	http://infoweb.newsbank.com/resources/doc/nb/news/0EB72CF6183F7C8C?p=AWNB	BRENDA C. COLEMAN	2000-01-12	No
Miami Herald	HIV Resistance	ON-AND-OFF DRUG APPROACH USED IN AIDS FIGHT	http://infoweb.newsbank.com/resources/doc/nb/news/0EB72E3F2D8E3D76?p=AWNB	DANIEL Q. HANEY	2000-07-12	No	Emerge, Mutate
Miami Herald	HIV Resistance	A MOTHER'S TOUCH	http://infoweb.newsbank.com/resources/doc/nb/news/0EB7300A680D7899?p=AWNB	MICHELE CHANDLER	2001-03-05	No	Develop
Miami Herald	HIV Resistance	ZINC TO BE TESTED AS HIV AID	http://infoweb.newsbank.com/resources/doc/nb/news/0ED84CEFF89D829B?p=AWNB	JENNIFER MILLER	2001-07-26	No	Develop
Miami Herald	HIV Resistance	AIDS DEATHS HIT PLATEAU; SOME GROUPS MORE AT RISK	http://infoweb.newsbank.com/resources/doc/nb/news/0EDE8F90B2F8BFC4?p=AWNB	Herald Wire Services	2001-08-14	No
Miami Herald	HIV Resistance	AIDS VIRUS ELUDING SOME TOUGH DRUGS	http://infoweb.newsbank.com/resources/doc/nb/news/0F086E29B7A8F45C?p=AWNB	STEPHEN SMITH	2001-12-19	Yes	Develop, Emerge, Mutate, Adapt
Miami Herald	HIV Resistance	ATTITUDES HINDER WAR ON AFFLICTION IN STATE, U.S.	http://infoweb.newsbank.com/resources/doc/nb/news/0F4AAAC64E3721FC?p=AWNB	FRED TASKER	2002-07-07	No
Miami Herald	HIV Resistance	NEW DRUG OFFERS HOPE AGAINST RESISTANT HIV	http://infoweb.newsbank.com/resources/doc/nb/news/0F4AFDEF4E8F301A?p=AWNB	FRED TASKER	2002-07-09	No	Develop, Mutate
Miami Herald	HIV Resistance	STUDY SAYS NEW HIV DRUG WORKS IN RESISTANT PATIENTS	http://infoweb.newsbank.com/resources/doc/nb/news/0FB5C7D9EF0A746B?p=AWNB	FRED TASKER	2003-05-29	No	Mutate, Develop
Miami Herald	HIV Resistance	10 PERCENT OF EUROPEANS INFECTED WITH HIV HAVE A RESISTANT STRAIN	http://infoweb.newsbank.com/resources/doc/nb/news/0FC84A22B758D218?p=AWNB	Associated Press	2003-07-17	No	Develop
Miami Herald	HIV Resistance	3-DRUG COMBO SHOWN AS BEST AIDS THERAPY	http://infoweb.newsbank.com/resources/doc/nb/news/0FF66433190987B6?p=AWNB	LINDA A. JOHNSON	2003-12-11	No	Mutate
Miami Herald	HIV Resistance	DevelopING DRUGS CALLS FOR STRATEGIC THINKING	http://infoweb.newsbank.com/resources/doc/nb/news/1041DA51A4225DB2?p=AWNB	FRED TASKER	2004-07-27	No	Mutate, Develop
Miami Herald	HIV Resistance	BUSH NoT TOLD OF DOUBTS ABOUT AIDS DRUG SAFETY	http://infoweb.newsbank.com/resources/doc/nb/news/10705632C8B8B586?p=AWNB	JOHN SOLOMON	2004-12-14	No	Develop
Miami Herald	HIV Resistance	HIV DRUG PROTECTS BABIES, BUT AT A GRIM COST	http://infoweb.newsbank.com/resources/doc/nb/news/1070FF24174CD24B?p=AWNB	ALEXANDRA ZAVIS	2004-12-17	No
Miami Herald	HIV Resistance	AMA: DON'T SKIP HIV DRUGS	http://infoweb.newsbank.com/resources/doc/nb/news/107A3979D11188BC?p=AWNB	FRED TASKER AND JACOB GOLDSTEIN	2005-01-14	No	Mutate, Develop
Miami Herald	HIV Resistance	SCARY, NEW HIV STRAIN DISCOVERED	http://infoweb.newsbank.com/resources/doc/nb/news/1084C642D9D78656?p=AWNB	Herald Wire Services	2005-02-12	No
Miami Herald	HIV Resistance	AIDS CASES INCREASE IN DADE	http://infoweb.newsbank.com/resources/doc/nb/news/1085C282ED078214?p=AWNB	FRED TASKER	2005-02-18	No	Develop
Miami Herald	HIV Resistance	GENERATIONS TO FACE BATTLE AGAINST AIDS, TOP RESEARCHER SAYS	http://infoweb.newsbank.com/resources/doc/nb/news/1088D3D54DAC21F2?p=AWNB	FRED TASKER	2005-02-25	No	Develop
Miami Herald	HIV Resistance	NEW ANTI-HIV DRUG ON FAST TRACK	http://infoweb.newsbank.com/resources/doc/nb/news/10AF47799A25D199?p=AWNB	FRED TASKER	2005-06-24	No	Develop, Mutate
Miami Herald	HIV Resistance	DRUGS FAILING FOR 40,000 AMERICANS WITH AIDS	http://infoweb.newsbank.com/resources/doc/nb/news/10FAC4AE780E8660?p=AWNB	JAMES RICCI	2006-02-05	No	Develop, Mutate
Miami Herald	HIV Resistance	AIDS ACTIVIST GIVEN TRANSPLANT FROM BABOON DIES	http://infoweb.newsbank.com/resources/doc/nb/news/114DD0E67510C720?p=AWNB	Associated Press	2006-10-16	No	Develop
Miami Herald	HIV Resistance	DISEASES: Researchers get clues for ways to attack HIV - A new study has found some weaknesses in HIV, which may lead to new ways to attack it.	http://infoweb.newsbank.com/resources/doc/nb/news/11E1BE6DE8A3A020?p=AWNB	JOHN LAUERMAN	2008-01-11	No	Mutate
Miami Herald	HIV Resistance	AIDS	http://infoweb.newsbank.com/resources/doc/nb/news/120D2530B10A7950?p=AWNB	DESONTA HOLDER	2008-04-15	No	Develop, Mutate
Miami Herald	HIV Resistance	Born with HIV, growing up as an outsider - The first group of young adults who were born with HIV are coming of age.	http://infoweb.newsbank.com/resources/doc/nb/news/1378636818C579F8?p=AWNB	Sammy Mack	2011-05-28	No	Develop
Minneapolis Star-Tribune	HIV Resistance	New AIDS battle - `U' discovers transmission of drug-resistant strain of HIV	http://infoweb.newsbank.com/resources/doc/nb/news/0EFD673209B40CC8?p=AWNB	Gordon Slovut	1993-04-22	No	Mutate
Minneapolis Star-Tribune	HIV Resistance	Study revises treatment for brain aneurysms	http://infoweb.newsbank.com/resources/doc/nb/news/0EFD6492006B0BBC?p=AWNB	Jill Burcum	1998-12-10	No	Develop
Minneapolis Star-Tribune	HIV Resistance	Physicians and patients consider merits of delaying HIV treatment	http://infoweb.newsbank.com/resources/doc/nb/news/0EFCCCDF975024C1?p=AWNB	Maura Lerner	2000-02-21	Yes	Mutate
Minneapolis Star-Tribune	HIV Resistance	A wait and see on HIV alert - State treads middle ground on news of drug-resistant strain.	http://infoweb.newsbank.com/resources/doc/nb/news/108927D1E642F913?p=AWNB	Warren Wolfe	2005-02-21	No	Develop
Minneapolis Star-Tribune	HIV Resistance	State may drop some from HIV Program - Officials say the law permits action against those owing co-pays, but patient advocates say the move affects the neediest.	http://infoweb.newsbank.com/resources/doc/nb/news/10E6322768A672C8?p=AWNB	Glenn Howatt	2005-12-07	No	Develop
Minneapolis Star-Tribune	HIV Resistance	NEW GENERATION FACES ITS OWN HIV STRUGGLES - Those born with HIV can live healthy lives, but with new risks.	http://infoweb.newsbank.com/resources/doc/nb/news/14086D4021AED550?p=AWNB	DANIELA HERNANDEZ	2012-08-07	No	Mutate
Minneapolis Star-Tribune	HIV Resistance	Being HIV-positive No longer considered a death sentence - People with HIV are living longer thanks to medical advances, but many still face a public stigma.	http://infoweb.newsbank.com/resources/doc/nb/news/159792D9F45654A8?p=AWNB	ALLIE SHAH	2015-12-01	No	Develop
New York Daily News	HIV Resistance	AIDS BREAKTHROUGH	http://www.lexisnexis.com/lnacui2api/api/version1/getDocCui?lni=3SCH-HJS0-0093-D4WY&csi=151550&hl=t&hv=t&hnsd=f&hns=t&hgn=t&oc=00240&perma=true	JOE NICHOLSON	1996-06-23	No	Mutate
New York Daily News	HIV Resistance	AIDS: WAR'S NoT OVER MULTI-DRUG 'COCKTAILS' HELP MANY, BUT OTHERS AWAIT CURE	http://www.lexisnexis.com/lnacui2api/api/version1/getDocCui?lni=3SCH-GKT0-0093-D2Y9&csi=151550&hl=t&hv=t&hnsd=f&hns=t&hgn=t&oc=00240&perma=true	JOE NICHOLSON	1997-02-02	No	Develop
New York Daily News	HIV Resistance	LIVING WITH HIV	http://www.lexisnexis.com/lnacui2api/api/version1/getDocCui?lni=3V6Y-F7J0-0093-D1VY&csi=151550&hl=t&hv=t&hnsd=f&hns=t&hgn=t&oc=00240&perma=true	SUSAN FERRARO	1998-11-30	No	Develop
New York Daily News	HIV Resistance	CITY TO OK RX DRUGS FOR SICK ARRESTEES	http://www.lexisnexis.com/lnacui2api/api/version1/getDocCui?lni=3WFC-0B90-0093-D2B9&csi=151550&hl=t&hv=t&hnsd=f&hns=t&hgn=t&oc=00240&perma=true	JOHN MARZULLI	1999-05-09	No	Develop
New York Daily News	HIV Resistance	DOCS' NEW APPROACH IN FIGHT VS. AIDS	http://www.lexisnexis.com/lnacui2api/api/version1/getDocCui?lni=3YG6-0750-00T0-G2FT&csi=151550&hl=t&hv=t&hnsd=f&hns=t&hgn=t&oc=00240&perma=true	n/a	2000-02-01	Yes	Mutate
New York Daily News	HIV Resistance	STOP-START AIDS TREATMENT EYED	http://www.lexisnexis.com/lnacui2api/api/version1/getDocCui?lni=40PP-CGC0-00T0-G089&csi=151550&hl=t&hv=t&hnsd=f&hns=t&hgn=t&oc=00240&perma=true	MARTY ROSEN	2000-07-12	No	Develop, Emerge
New York Daily News	HIV Resistance	NABES GET A CHILLING JOLT BACK TO THE DEADLY '80S	http://www.lexisnexis.com/lnacui2api/api/version1/getDocCui?lni=4FGJ-10F0-TWCR-41TY&csi=151550&hl=t&hv=t&hnsd=f&hns=t&hgn=t&oc=00240&perma=true	KATE MEYER	2005-02-12	No	Emerge
New York Daily News	HIV Resistance	HIV DRUG ILLS WORRY DOCS	http://www.lexisnexis.com/lnacui2api/api/version1/getDocCui?lni=4KFF-CDB0-TWCR-427D&csi=151550&hl=t&hv=t&hnsd=f&hns=t&hgn=t&oc=00240&perma=true	PAUL H.B. SHIN	2006-07-19	No	Emerge
New York Times	HIV Resistance	A New Therapy Approach: Cancer as a Model for AIDS	http://search.proquest.com/nytimes/docview/427248932/fulltext/F4ED0BC832F645E3PQ/142?accountid=14512	LAWRENCE K. ALTMAN, Special to The New York Times. New York Times,	1989-06-13	No	Develop
New York Times	HIV Resistance	THE DOCTOR'S WORLD; Gains Cited on AIDS, But Urgency Remains	http://search.proquest.com/nytimes/docview/428092116/fulltext/D7309B348F3B48B6PQ/3?accountid=14512	Lawrence K. Altman M.D.	1991-06-25	No	Develop
New York Times	HIV Resistance	Dow Recovers From Drop to Finish 14.08 Higher	http://search.proquest.com/nytimes/docview/428261833/fulltext/F4ED0BC832F645E3PQ/123?accountid=14512	Cowan, Alison Leigh. New York Times	1991-11-27	No	Develop
New York Times	HIV Resistance	New H.I.V. strains resist AIDS drug	http://search.proquest.com/nytimes/docview/428896646/fulltext/F4ED0BC832F645E3PQ/106?accountid=14512	N/A	1993-01-01	No	Develop
New York Times	HIV Resistance	Study Reveals a Frustrating Skill of AIDS Virus	http://search.proquest.com/nytimes/docview/430144357/fulltext/F4ED0BC832F645E3PQ/93?accountid=14512	N/A	1995-04-06	No	Develop
New York Times	HIV Resistance	Drug Companies Turn Aggressive In Promoting New Drugs for AIDS	http://search.proquest.com/nytimes/docview/430620383/fulltext/F4ED0BC832F645E3PQ/63?accountid=14512	Dunlap, David W; Fisher, Lawrence M. New York Times	1996-07-05	No	Mutate
New York Times	HIV Resistance	AIDS Meeting: Signs of Hope, And Obstacles	http://search.proquest.com/nytimes/docview/430610696/fulltext/F4ED0BC832F645E3PQ/103?accountid=14512	Altman, Lawrence K. New York Times	1996-07-07	No	Develop, Emerge
New York Times	HIV Resistance	Powerful Response Reported In a Combined AIDS Therapy	http://search.proquest.com/nytimes/docview/430609386/fulltext/F4ED0BC832F645E3PQ/105?accountid=14512	Altman, Lawrence K. New York Times	1996-07-11	No	Develop
New York Times	HIV Resistance	The Risk In a 'Cure' For AIDS: [Op-Ed]	http://search.proquest.com/nytimes/docview/430607772/fulltext/F4ED0BC832F645E3PQ/49?accountid=14512	Rotello, Gabriel. New York Times,	1996-07-14	Yes	Develop, Mutate
New York Times	HIV Resistance	BiotechNology Medications Move Closer to the Market	http://search.proquest.com/nytimes/docview/430696841/fulltext/F4ED0BC832F645E3PQ/50?accountid=14512	Fisher, Lawrence M. New York Times,	1996-12-24	No	Develop
New York Times	HIV Resistance	Hype, Hope and Hurt on the AIDS Front Lines: [Interview]	http://search.proquest.com/nytimes/docview/430731167/fulltext/F4ED0BC832F645E3PQ/87?accountid=14512	Dunlap, David W. New York Times,	1997-02-02	No
New York Times	HIV Resistance	Doctors Withhold H.I.V. Pill Regimen From Some	http://search.proquest.com/nytimes/docview/430761776/fulltext/D7309B348F3B48B6PQ/9?accountid=14512	DEBORAH SONTAG and LYNDA RICHARDSON	1997-03-02	No
New York Times	HIV Resistance	Cattle Virus Is Redesigned to Attack H.I.V.	http://search.proquest.com/nytimes/docview/430855540/fulltext/F4ED0BC832F645E3PQ/68?accountid=14512	Wade, Nicholas. New York Times	1997-09-05	No	Develop
New York Times	HIV Resistance	New Molecule Protects Cells Against H.I.V.	http://search.proquest.com/nytimes/docview/430864771/fulltext/F4ED0BC832F645E3PQ/72?accountid=14512	N/A	1997-10-24	No	Develop
New York Times	HIV Resistance	New Studies Offer Hope and Caution on Aids Therapies	http://search.proquest.com/nytimes/docview/430874010/fulltext/D7309B348F3B48B6PQ/30?accountid=14512	Grady, Denise. New York Times	1997-11-14	Yes	Develop, Mutate
New York Times	HIV Resistance	Research on Anti-H.I.V. Drugs Is a Combination of Progress and Setback	http://search.proquest.com/nytimes/docview/430928556/fulltext/F4ED0BC832F645E3PQ/67?accountid=14512	Altman, Lawrence K. New York Times	1998-02-06	No
New York Times	HIV Resistance	H.I.V. Tests May Help Fight Virus's Resistance to Drugs	http://search.proquest.com/nytimes/docview/431136254/fulltext/D7309B348F3B48B6PQ/15?accountid=14512	Altman, Lawrence K	1999-02-05	No	Develop
New York Times	HIV Resistance	Landmark Studies Change Outlook of AIDS Treatment	http://search.proquest.com/nytimes/docview/430604515/fulltext/F4ED0BC832F645E3PQ/47?accountid=14512	Altman, Lawrence K. New York Times,	1999-07-14	No	Acquire, Emerge, Develop
New York Times	HIV Resistance	Rare and Aggressive H.I.V. Reported in New York	http://search.proquest.com/nytimes/docview/432979027/fulltext/D7309B348F3B48B6PQ/24?accountid=14512	MARC SANTORA and LAWRENCE K. ALTMAN; Donald G. McNeil Jr. contributed reporting for this article.. New York Times	2000-02-12	No
New York Times	HIV Resistance	The New Landscape of AIDS	http://search.proquest.com/nytimes/docview/431477556/fulltext/F4ED0BC832F645E3PQ/97?accountid=14512	Steinhauer, Jennifer. New York Times	2000-06-25	No	Develop
New York Times	HIV Resistance	South Africa Rejects Use Of AIDS Drug For Women	http://search.proquest.com/nytimes/docview/432811793/fulltext/F4ED0BC832F645E3PQ/58?accountid=14512	By SHARON LaFRANIERE. New York Times	2000-07-14	No	Develop
New York Times	HIV Resistance	Test Helps Doctors Find Best AIDS Drugs	http://search.proquest.com/nytimes/docview/431637140/fulltext/D7309B348F3B48B6PQ/21?accountid=14512	Pollack, Andrew. New York Times	2001-01-17	No	Develop, Mutate
New York Times	HIV Resistance	The AIDS Questions That Linger	http://search.proquest.com/nytimes/docview/431654697/fulltext/F4ED0BC832F645E3PQ/66?accountid=14512	Lawrence K. Altman, M.D.. New York Times	2001-01-30	No	Develop
New York Times	HIV Resistance	Study Reports Drug-Resistant Strains Have Increased to 14 Percent Among New H.I.V. Cases	http://search.proquest.com/nytimes/docview/431671932/fulltext/D7309B348F3B48B6PQ/18?accountid=14512	Altman, Lawrence K. New York Times,	2001-02-08	No	Acquire, Mutate
New York Times	HIV Resistance	To Combat the Wily H.I.V., Newer and Safer Drugs Are Necessary	http://search.proquest.com/nytimes/docview/431663819/fulltext/F4ED0BC832F645E3PQ/59?accountid=14512	Lawrence K. Altman, M.D.. New York Times	2001-02-13	No	Develop
New York Times	HIV Resistance	F.D.A. Panel Supports Gilead Sciences Aids Drug	http://search.proquest.com/nytimes/docview/431888718/fulltext/F4ED0BC832F645E3PQ/65?accountid=14512	N/A	2001-10-04	No	Develop
New York Times	HIV Resistance	Drug Reduces H.I.V. Rates in Newborns, Thai Study Shows	http://search.proquest.com/nytimes/docview/432139816/fulltext/D7309B348F3B48B6PQ/31?accountid=14512	Altman, Lawrence K. New York Times	2002-07-07	No
New York Times	HIV Resistance	Drug Offers Hope With Resistant H.I.V., Scientists Say	http://search.proquest.com/nytimes/docview/432141458/fulltext/D7309B348F3B48B6PQ/38?accountid=14512	Altman, Lawrence K. New York Times	2002-07-09	No	Develop
New York Times	HIV Resistance	South Africa May Bar AIDS Drug in Childbirth	http://search.proquest.com/nytimes/docview/432163273/fulltext/F4ED0BC832F645E3PQ/78?accountid=14512	Swarns, Rachel L. New York Times	2002-08-07	No
New York Times	HIV Resistance	H.I.V. Lessons Used in Hepatitis C Treatment	http://search.proquest.com/nytimes/docview/432347640/fulltext/F4ED0BC832F645E3PQ/73?accountid=14512	Pollack, Andrew. New York Times,	2003-03-11	No	Develop, Mutate
New York Times	HIV Resistance	F.D.A. to Give Accelerated Review to TaNox Drug	http://search.proquest.com/nytimes/docview/432552770/fulltext/F4ED0BC832F645E3PQ/60?accountid=14512	N/A	2003-10-10	No
New York Times	HIV Resistance	Infant Drugs For H.I.V. Put Mothers at Risk	http://search.proquest.com/nytimes/docview/432687639/fulltext/D7309B348F3B48B6PQ/19?accountid=14512	Altman, Lawrence K. New York Times,	2004-02-10	No	Develop
New York Times	HIV Resistance	AIDS Drugs' Fast Rise in Asia Risks Resistant Strains	http://search.proquest.com/nytimes/docview/432814677/fulltext/D7309B348F3B48B6PQ/25?accountid=14512	Altman, Lawrence K. New York Times,	2004-07-08	No	Develop, Mutate
New York Times	HIV Resistance	2 Cheap Drugs Combined Can Prevent H.I.V. in Newborns	http://search.proquest.com/nytimes/docview/432817075/fulltext/F4ED0BC832F645E3PQ/76?accountid=14512	McNEIL, DONALD G, Jr. New York Times	2004-07-10	No	Develop, Mutate
New York Times	HIV Resistance	Among Gays Grown Complacent And Often Careless, Fear Returns	http://search.proquest.com/nytimes/docview/432982629/fulltext/F4ED0BC832F645E3PQ/62?accountid=14512	Confessore, Nicholas. New York Times	2005-02-12	No	Develop
New York Times	HIV Resistance	AIDS Report Brings Alarm, Not Surprise	http://search.proquest.com/nytimes/docview/432982284/fulltext/D7309B348F3B48B6PQ/20?accountid=14512	RICHARD PEREZ-PENA and MARC SANTORA; Reporting for this article was contributed by Jennifer 8. Lee, Johanna Jainchill and JaNon Fisher in New York; Perry Athanason in Miami; and Carol Pogash in San Francisco..New York Times	2005-02-13	No	Emerge, Mutate
New York Times	HIV Resistance	Scientists Urge More Study On a Rare Strain of H.I.V.	http://search.proquest.com/nytimes/docview/432983377/fulltext/D7309B348F3B48B6PQ/29?accountid=14512	DONALD G. McNEIL Jr. and LAWRENCE K. ALTMAN; Carol Pogash in San Francisco contributed reporting for this article.. New York Times	2005-02-13	No	Mutate
New York Times	HIV Resistance	Search for Origin of New AIDS Strain Widens	http://search.proquest.com/nytimes/docview/432977231/fulltext/D7309B348F3B48B6PQ/22?accountid=14512	Altman, Lawrence K; Marc Santora contributed reporting for this article.. New York Times	2005-02-14	No
New York Times	HIV Resistance	Scientists Explore Meth's Role in Immune System	http://search.proquest.com/nytimes/docview/432999402/fulltext/F4ED0BC832F645E3PQ/85?accountid=14512	O'ConNor, Anahad. New York Times	2005-02-22	No	Emerge
New York Times	HIV Resistance	Rare AIDS Strain Is Very Aggressive, Study Says	http://search.proquest.com/nytimes/docview/433014934/fulltext/D7309B348F3B48B6PQ/27?accountid=14512	Santora, Marc. New York Times	2005-03-18	No	Acquire
New York Times	HIV Resistance	Their Unexpected Adolescence	http://search.proquest.com/nytimes/docview/215478838/fulltext/F4ED0BC832F645E3PQ/45?accountid=14512	Dee, Jonathan. New York Times Magazine	2005-06-26	No	Develop
New York Times	HIV Resistance	Children Slip Through Cracks of AIDS Efforts, W.H.O. Says	http://search.proquest.com/nytimes/docview/433379674/fulltext/F4ED0BC832F645E3PQ/54?accountid=14512	Altman, Lawrence K. New York Times	2006-08-17	No	Develop
New York Times	HIV Resistance	2 New Drugs Offer Options To Fight H.I.V. in Novel Ways	http://search.proquest.com/nytimes/docview/433504633/fulltext/F4ED0BC832F645E3PQ/77?accountid=14512	LAWRENCE K. ALTMAN and ANDREW POLLACK. New York Times	2007-02-28	No	Develop
New York Times	HIV Resistance	H.I.V. Research Opens Up Potential Targets for Drugs	http://search.proquest.com/nytimes/docview/433767340/fulltext/F4ED0BC832F645E3PQ/57?accountid=14512	McNEIL, DONALD G, Jr. New York Times,	2008-01-11	Yes	Mutate
New York Times	HIV Resistance	Medicines: Effort for Lower Drug Prices Would Focus On Gaining Patents: [Science Desk]	http://search.proquest.com/nytimes/docview/433892162/fulltext/F4ED0BC832F645E3PQ/126?accountid=14512	McNEIL, DONALD G, Jr. New York Times	2008-07-08	No	Develop
New York Times	HIV Resistance	Questions Help Find AIDS Patients Who Are Vulnerable to Drug Resistance: [Science Desk]	http://search.proquest.com/nytimes/docview/434086672/fulltext/D7309B348F3B48B6PQ/17?accountid=14512	McNEIL, DONALD G, Jr. New York Times	2009-05-19	No	Develop
New York Times	HIV Resistance	Fighting H.I.V., A Community At a Time: [Science Desk]	http://search.proquest.com/nytimes/docview/434209050/fulltext/F4ED0BC832F645E3PQ/90?accountid=14512	Okie, Susan. New York Times	2009-10-27	No
New York Times	HIV Resistance	Study Finds Pill Greatly Lowers the Risk of Aids: [National Desk]	http://search.proquest.com/nytimes/docview/808431958/fulltext/F4ED0BC832F645E3PQ/82?accountid=14512	McNEIL, DONALD G, Jr. New York Times,	2010-11-24	Yes	Develop
New York Times	HIV Resistance	U.N. Reports Decrease in New H.I.V. Infections: [Foreign Desk]	http://search.proquest.com/nytimes/docview/808432016/fulltext/F4ED0BC832F645E3PQ/91?accountid=14512	McNEIL, DONALD G, Jr. New York Times	2010-11-24	No	Develop
New York Times	HIV Resistance	Aids: A Price Break for Antiretroviral Drugs in 70 of the World's Poorest Countries: [Science Desk]	http://search.proquest.com/nytimes/docview/868208261/fulltext/F4ED0BC832F645E3PQ/71?accountid=14512	McNEIL, DONALD G, Jr. New York Times	2011-05-24	No	Develop
New York Times	HIV Resistance	F.D.A. Advisory Panel Backs Preventive Use of H.I.V. Drug: [National Desk]	http://search.proquest.com/nytimes/docview/1012180271/fulltext/F4ED0BC832F645E3PQ/81?accountid=14512	Grady, Denise. New York Times	2012-05-11	No	Develop
New York Times	HIV Resistance	Prevention In a Pill Has Risks Of Its Own: [News Analysis]	http://search.proquest.com/nytimes/docview/1013467877/fulltext/F4ED0BC832F645E3PQ/69?accountid=14512	Grady, Denise. New York Times	2012-05-15	No	Emerge
New York Times	HIV Resistance	Aids: Drug Resistance Growing in Parts of Africa for Antiretroviral Treatment, a Study Says: [Science Desk]	http://search.proquest.com/nytimes/docview/1027479304/fulltext/D7309B348F3B48B6PQ/16?accountid=14512	McNEIL, DONALD G, Jr. New York Times	2012-07-24	No	Develop
New York Times	HIV Resistance	A World Without AIDS, Still Worlds Away: [Science Desk]	http://search.proquest.com/nytimes/docview/1030174324/fulltext/F4ED0BC832F645E3PQ/80?accountid=14512	Zuger, Abigail; M.D.. New York Times	2012-07-31	No
New York Times	HIV Resistance	City Versus Epidemic: [Science Desk]	http://search.proquest.com/nytimes/docview/1719187248/fulltext/F4ED0BC832F645E3PQ/100?accountid=14512	McNEIL, DONALD G, Jr. New York Times	2015-10-06	No	Develop
Newark Star-Ledger	HIV Resistance	U.S. TO TEST NEW AIDS DRUG ON PATIENTS	http://infoweb.newsbank.com/resources/doc/nb/news/122472C4806643B0?p=AWNB	N/A	1993-03-24	No	Mutate
Newark Star-Ledger	HIV Resistance	TOP FIRMS 'UNITE' ON AIDS	http://infoweb.newsbank.com/resources/doc/nb/news/1224734D0FCD7C88?p=AWNB	JOAN WHITLOW	1993-04-20	No	Develop, Mutate
Newark Star-Ledger	HIV Resistance	MERCK BUYS BIOTECH STAKE AND DROPS AIDS COMPOUND	http://infoweb.newsbank.com/resources/doc/nb/news/1224764A26399178?p=AWNB	IRIS TAYLOR	1993-09-16	No	Mutate
Newark Star-Ledger	HIV Resistance	TOUGHER AIDS FINDING MAY SHIFT ATTACK PLAN	http://infoweb.newsbank.com/resources/doc/nb/news/122479366711E848?p=AWNB	N/A	1993-12-18	No	Develop, Adapt
Newark Star-Ledger	HIV Resistance	NEW AIDS DRUG APPROVED FOR WIDER TESTING	http://infoweb.newsbank.com/resources/doc/nb/news/122483AB53ABA8E8?p=AWNB	JOAN WHITLOW	1994-02-01	No	Develop
Newark Star-Ledger	HIV Resistance	MERCK'S AIDS DRUG YIELDS LIMITED RESULTS	http://infoweb.newsbank.com/resources/doc/nb/news/1224848BC6AD4A20?p=AWNB	JOAN WHITLOW	1994-02-27	No	Mutate
Newark Star-Ledger	HIV Resistance	STATE DOCTORS ADVOCATE AIDS TESTS IN PUSH FOR TREATMENT IN PREGNANCY	http://infoweb.newsbank.com/resources/doc/nb/news/1224869E31AF6BE0?p=AWNB	JOAN WHITLOW	1994-04-19	No	Develop
Newark Star-Ledger	HIV Resistance	FDA PANEL BACKS NEW AIDS DRUG DESPITE QUESTIONS ABOUT BENEFITS	http://infoweb.newsbank.com/resources/doc/nb/news/12248856AA9AE410?p=AWNB	N/A	1994-05-21	No	Mutate
Newark Star-Ledger	HIV Resistance	WORLD'S EXPERTS ON AIDS TO GATHER IN JAPAN	http://infoweb.newsbank.com/resources/doc/nb/news/12248AEADAB061D8?p=AWNB	N/A	1994-08-07	No	Mutate
Newark Star-Ledger	HIV Resistance	GLOBAL HEALTH GROUP CITES 3 MILLION NEW CASES OF AIDS WORLDWIDE	http://infoweb.newsbank.com/resources/doc/nb/news/12248AF77497F570?p=AWNB	N/A	1994-08-09	Yes	Develop
Newark Star-Ledger	HIV Resistance	AIDS EXPERTS CONSIDER THE RISKS OF AZT USE BY PREGNANT WOMEN	http://infoweb.newsbank.com/resources/doc/nb/news/12248D3BBACB7F98?p=AWNB	JOAN WHITLOW	1994-10-15	No
Newark Star-Ledger	HIV Resistance	STUDY CONFIRMS AZT'S ROLE IN CUTTING MOTHER-TO-FETUS AIDS TRANSMISSION	http://infoweb.newsbank.com/resources/doc/nb/news/12248E05DC65CE50?p=AWNB	JOAN WHITLOW	1994-11-03	No	Develop
Newark Star-Ledger	HIV Resistance	NEW DRUG CALLED BOOSTER FOR AZT	http://infoweb.newsbank.com/resources/doc/nb/news/12248EB880D345F0?p=AWNB	N/A	1994-11-21	No	Develop
Newark Star-Ledger	HIV Resistance	NEW AIDS TREATMENT OFFERED VIA LOTTERY BY JERSEY DRUG MAKER	http://infoweb.newsbank.com/resources/doc/nb/news/1224CF1759ADE5F8?p=AWNB	Associated Press	1995-07-18	No	Develop
Newark Star-Ledger	HIV Resistance	NEW AIDS DRUG IS CALLED MOST POWERFUL YET	http://infoweb.newsbank.com/resources/doc/nb/news/1224D6F1A06D3560?p=AWNB	LAURAN NEERGAARD	1995-11-05	No	Develop
Newark Star-Ledger	HIV Resistance	ROCHE'S '2-PUNCH' AIDS DRUG READY FOR STORES AFTER SWIFT FDA APPROVAL	http://infoweb.newsbank.com/resources/doc/nb/news/1224D83139DF00A0?p=AWNB	LAURAN NEERGAARD	1995-12-08	No	Develop
Newark Star-Ledger	HIV Resistance	MERCK DRUG SHOWS POTENCY AGAINST HIV	http://infoweb.newsbank.com/resources/doc/nb/news/0EFDA9CCECA2C248?p=AWNB	KITTA MacPHERSON	1996-01-30	Yes
Newark Star-Ledger	HIV Resistance	Promises & Profits. New AIDS drug may extend lives - and create fortunes	http://infoweb.newsbank.com/resources/doc/nb/news/0EFDA9E85DE3892B?p=AWNB	Kitta MacPherson and Edward R. Silverman	1996-02-18	No	Develop
Newark Star-Ledger	HIV Resistance	War on AIDS brings drug rivals together	http://infoweb.newsbank.com/resources/doc/nb/news/0EFDA9F5D0FDDD62?p=AWNB	KITTA MacPHERSON	1996-02-29	No	Mutate
Newark Star-Ledger	HIV Resistance	Experts link failure of drugs to erratic use by patients	http://infoweb.newsbank.com/resources/doc/nb/news/0EFDAAD7D094B33E?p=AWNB	KITTA MacPHERSON	1996-07-09	No	Mutate
Newark Star-Ledger	HIV Resistance	PRICING A PROMISE	http://infoweb.newsbank.com/resources/doc/nb/news/0EFDAADA48AC0B44?p=AWNB	N/A	1996-07-10	No
Newark Star-Ledger	HIV Resistance	Tests find drug combo suppresses AIDS virus	http://infoweb.newsbank.com/resources/doc/nb/news/0EFDAADA8AB63297?p=AWNB	KITTA MacPHERSON	1996-07-11	No	Develop, Mutate
Newark Star-Ledger	HIV Resistance	A tough drug regimen brings new hope to people with AIDS Time In A - Bottle	http://infoweb.newsbank.com/resources/doc/nb/news/0EFDAB485960E0EC?p=AWNB	DONNA LEUSNER	1996-09-16	No	Develop
Newark Star-Ledger	HIV Resistance	AIDS patients in Jersey to be part of study - Project to assess effects of protease inhibitor	http://infoweb.newsbank.com/resources/doc/nb/news/0EFDABE024C70E51?p=AWNB	Kitta MacPherson, Star-Ledger Staff	1996-12-11	No
Newark Star-Ledger	HIV Resistance	MDs: Drugs work magic on Johnson's AIDS	http://infoweb.newsbank.com/resources/doc/nb/news/0EFDA77CCFCEFF9C?p=AWNB	Dara Akiko Tom, ASSOCIATED PRESS	1997-04-05	No	Develop
Newark Star-Ledger	HIV Resistance	New AIDS drug brings hope, and despair - Varying success cuts rift between patients	http://infoweb.newsbank.com/resources/doc/nb/news/0EFDA7C7630B1782?p=AWNB	Delia M. Rios	1997-05-11	No	Develop
Newark Star-Ledger	HIV Resistance	Merck HIV drug to be sold nationwide	http://infoweb.newsbank.com/resources/doc/nb/news/0EFDA7CDE5209161?p=AWNB	John Hendren, ASSOCIATED PRESS	1997-05-15	No	Develop
Newark Star-Ledger	HIV Resistance	HIV showing resistance to new drugs - Combination therapy begins to falter in half of AIDS patients in hospital study	http://infoweb.newsbank.com/resources/doc/nb/news/0EFDA8978E6729BB?p=AWNB	Daniel Q. Haney, ASSOCIATED PRESS	1997-09-30	No
Newark Star-Ledger	HIV Resistance	New AIDS drugs fail to eradicate virus perma	http://infoweb.newsbank.com/resources/doc/nb/news/0EFDA92DC0B94B20?p=AWNB	Paul Recer, ASSOCIATED PRESS	1997-11-14	No	Develop
Newark Star-Ledger	HIV Resistance	First inexpensive AIDS drug is identified - Researchers say substance brings remission, but some experts remain skeptical of claims	http://infoweb.newsbank.com/resources/doc/nb/news/0EFDA3890022B24E?p=AWNB	Thomas H. Maugh 2d, LOS ANGELES TIMES	1998-02-06	No	Develop, Mutate
Newark Star-Ledger	HIV Resistance	Drug-resistant AIDS strains can be transmitted, report says	http://infoweb.newsbank.com/resources/doc/nb/news/0EFDA4D60A202667?p=AWNB	Thomas H. Maugh 2d, LOS ANGELES TIMES	1998-07-01	No	Develop, Mutate
Newark Star-Ledger	HIV Resistance	U.S. deaths from AIDS plunge 47% - But new cases haven't ebbed	http://infoweb.newsbank.com/resources/doc/nb/news/0EFDA5B814EFDE25?p=AWNB	Laura Meckler, ASSOCIATED PRESS	1998-10-08	No	Develop
Newark Star-Ledger	HIV Resistance	New treatment shows promise in reducing hidden AIDS virus - Mixing immune system stimulant to HIV drug rinses virus from certain cells in test patients	http://infoweb.newsbank.com/resources/doc/nb/news/0EFDA6178B7BFE6F?p=AWNB	Joseph B. Verrengia, ASSOCIATED PRESS	1998-11-17	No	Develop
Newark Star-Ledger	HIV Resistance	AIDS drug approved for hepatitis B	http://infoweb.newsbank.com/resources/doc/nb/news/0EFDA64602ED14CF?p=AWNB	ASSOCIATED PRESS	1998-12-10	No	Develop
Newark Star-Ledger	HIV Resistance	New drugs may prove powerful in HIV battle - Fusion inhibitors give AIDS patients hope	http://infoweb.newsbank.com/resources/doc/nb/news/0EFD56B330B3129C?p=AWNB	Carol Ann Campbell, Star-Ledger Staff	1999-09-27	No	Develop
Newark Star-Ledger	HIV Resistance	Taking steps to control AIDS in Africa	http://infoweb.newsbank.com/resources/doc/nb/news/0EFDA19930C9EDE9?p=AWNB	The EcoNomist is a London-based newsmagazine	2000-07-20	No	Develop
Newark Star-Ledger	HIV Resistance	Dropoff in AIDS cases and deaths is flattening out - 40,000 new diagNoses are made annually, worrying health officials	http://infoweb.newsbank.com/resources/doc/nb/news/0EFD9EB2F1A55FA1?p=AWNB	SUSAN OKIE, WASHINGTON POST	2001-08-14	No
Newark Star-Ledger	HIV Resistance	A Rutgers researcher opens new door in fight to beat HIV	http://infoweb.newsbank.com/resources/doc/nb/news/0F0F29120C2DFC61?p=AWNB	CAROL ANN CAMPBELL, STAR-LEDGER STAFF	2002-01-09	No	Develop
Newark Star-Ledger	HIV Resistance	New AIDS weapons show promise - One drug attacks virus differently and other offers hope for a vaccine	http://infoweb.newsbank.com/resources/doc/nb/news/0F4AD288588DA7B8?p=AWNB	EMMA ROSS, ASSOCIATED PRESS	2002-07-09	No	Develop
Newark Star-Ledger	HIV Resistance	Experts show how AIDS beats drugs - Molecular-level work by Rutgers and other scientists shows why virus Develops resistance	http://infoweb.newsbank.com/resources/doc/nb/news/0F8775B5D85FE832?p=AWNB	KITTA MacPHERSON, STAR-LEDGER STAFF	2003-01-09	Yes	Develop, Mutate
Newark Star-Ledger	HIV Resistance	AIDS drug cost spurs concerns	http://infoweb.newsbank.com/resources/doc/nb/news/0F9C8DD5AD1FDF45?p=AWNB	ED SILVERMAN, STAR-LEDGER STAFF	2003-03-14	No	Develop
Newark Star-Ledger	HIV Resistance	Combination of three drugs found best for treating HIV	http://infoweb.newsbank.com/resources/doc/nb/news/0FF6340BDD29836B?p=AWNB	LINDA A. JOHNSON, ASSOCIATED PRESS	2003-12-11	No	Mutate
Newark Star-Ledger	HIV Resistance	Drug reduces HIV rate in newborns - S. African researchers praise use of nevirapine to cut virus' transmission	http://infoweb.newsbank.com/resources/doc/nb/news/10322C9660679931?p=AWNB	CRAIG TIMBERG, WASHINGTON POST	2004-06-10	No
Newark Star-Ledger	HIV Resistance	Brazil keeps ahead of AIDS through drug giveaways - Country wins praise for manufacturing and handing out generic versions of treatments	http://infoweb.newsbank.com/resources/doc/nb/news/103ABB0516959719?p=AWNB	MICHAEL ASTOR, ASSOCIATED PRESS	2004-07-06	No	Develop
Newark Star-Ledger	HIV Resistance	World AIDS care falls short of goal - Lack of health workers in Developing nations stymies WHO efforts	http://infoweb.newsbank.com/resources/doc/nb/news/103C60C0B4384BBF?p=AWNB	ELLEN NAKASHIMA AND DAVID BROWN, WASHINGTON POST	2004-07-11	No
Newark Star-Ledger	HIV Resistance	Pfizer AIDS drug has good early trial results	http://infoweb.newsbank.com/resources/doc/nb/news/103D6C19ADB3F732?p=AWNB	BEN HIRSCHLER, REUTERS	2004-07-14	No	Develop
Newark Star-Ledger	HIV Resistance	HIV's crystal key - The Aids virus is a quick-change artist that copies itself at lighting speed. But a team of scientists at Rutgers believes it can outsmart the killer.	http://infoweb.newsbank.com/resources/doc/nb/news/106F2600485BED2D?p=AWNB	KITTA MacPHERSON, STAR-LEDGER STAFF	2004-12-12	No	Mutate
Newark Star-Ledger	HIV Resistance	AMERICA'S SILENT WORRIES ABOUT AIDS DRUG FOR AFRICA NIH officials failed to warn the White House of sloppy research	http://infoweb.newsbank.com/resources/doc/nb/news/106FCEFC960BD51E?p=AWNB	JOHN SOLOMON, ASSOCIATED PRESS	2004-12-14	No
Newark Star-Ledger	HIV Resistance	Whistle-blower says AIDS study imperiled patients	http://infoweb.newsbank.com/resources/doc/nb/news/10770F049CD9681D?p=AWNB	JENNIFER C. KERR, ASSOCIATED PRESS	2005-01-05	No
Newark Star-Ledger	HIV Resistance	NYC looks for partners of man with drug-resistant HIV	http://infoweb.newsbank.com/resources/doc/nb/news/1083F764A026833D?p=AWNB	VERENA DOBNIK, ASSOCIATED PRESS	2005-02-13	No
Newark Star-Ledger	HIV Resistance	Drug-proof' AIDS worries Jersey MDs - Experts wonder whether resistant strain reported in N.Y. could be the tip of an iceberg	http://infoweb.newsbank.com/resources/doc/nb/news/10853EBCC6C6C864?p=AWNB	CAROL ANN CAMPBELL, STAR-LEDGER STAFF	2005-02-17	No	Mutate
Newark Star-Ledger	HIV Resistance	CDC says 2 drugs can't fight flu hitting U.S.	http://infoweb.newsbank.com/resources/doc/nb/news/10F2B21AA7C54258?p=AWNB	DANIEL YEE, ASSOCIATED PRESS	2006-01-15	No	Acquire
Newark Star-Ledger	HIV Resistance	Drug mix shows promise in preventing AIDS - Test results in monkeys are so `exciting' trials are starting in uninfected humans	http://infoweb.newsbank.com/resources/doc/nb/news/110A5FFE2C6C5468?p=AWNB	MARILYNN MARCHIONE, ASSOCIATED PRESS	2006-03-28	No
Newark Star-Ledger	HIV Resistance	FDA reviews potential benefits of experimental HIV treatment	http://infoweb.newsbank.com/resources/doc/nb/news/1126B3E91343D6C8?p=AWNB	JEFF MAY, STAR-LEDGER STAFF	2006-06-22	No	Develop, Mutate
Newark Star-Ledger	HIV Resistance	FDA approves HIV therapy by J&J	http://infoweb.newsbank.com/resources/doc/nb/news/11275CFDD7949730?p=AWNB	JEFF MAY, STAR-LEDGER STAFF	2006-06-24	No	Develop
Newark Star-Ledger	HIV Resistance	AIDS AT 25 - THE NEW FACE OF HIV IS REFLECTED IN NEW JERSEYANS LIVING WITH THE DISEASE	http://infoweb.newsbank.com/resources/doc/nb/news/112EA10322E1DEE0?p=AWNB	MEG NUGENT / PHOTOS BY ED MURRAY, STAR-LEDGER STAFF	2006-07-16	No	Develop, Mutate
Newark Star-Ledger	HIV Resistance	AIDS AT 25 - FOR SCIENTISTS IN SEARCH OF A VACCINE, THE ELUSIVE AND EVER-DEADLY HIV VIRUS IS A MYSTERY THAT MAY NEVER BE SOLVED	http://infoweb.newsbank.com/resources/doc/nb/news/112EFCAF39ECFAC0?p=AWNB	GEORGE E. JORDAN | PHOTOS BY ED MURRAY, STAR-LEDGER STAFF	2006-07-17	No
Newark Star-Ledger	HIV Resistance	24,000 to attend AIDS conference	http://infoweb.newsbank.com/resources/doc/nb/news/1137D74E15FA5F90?p=AWNB	KITTA MacPHERSON, STAR-LEDGER STAFF	2006-08-12	No
Newark Star-Ledger	HIV Resistance	Tests show Merck drug to be a promising weapon against HI	http://infoweb.newsbank.com/resources/doc/nb/news/1137DF245EF52FA8?p=AWNB	JIA-RUI CHONG, LOS ANGELES TIMES	2006-08-13	No	Develop
Newark Star-Ledger	HIV Resistance	AIDS blockers in testing stage - Pfizer, Schering-Plough Develop drugs to keep virus from raiding healthy cells	http://infoweb.newsbank.com/resources/doc/nb/news/1145B342117ECA50?p=AWNB	GEORGE E. JORDAN, STAR-LEDGER STAFF	2006-09-24	No
Newark Star-Ledger	HIV Resistance	J&J HIV drug beats peers - Prezista outperforms Kaletra in clinical trial	http://infoweb.newsbank.com/resources/doc/nb/news/11A3A1A28F6AC318?p=AWNB	JEFF MAY, STAR-LEDGER STAFF	2007-07-06	No	Develop
Newark Star-Ledger	HIV Resistance	Merck's new HIV drug wins approval	http://infoweb.newsbank.com/resources/doc/nb/news/11C43F382A0D7CD8?p=AWNB	SUSAN TODD, STAR-LEDGER STAFF	2007-10-13	No	Develop, Mutate
Newark Star-Ledger	HIV Resistance	AIDS study suggests faster drug regimen	http://infoweb.newsbank.com/resources/doc/nb/news/1241C02C802794D0?p=AWNB	MARILYNN MARCHIONE, ASSOCIATED PRESS	2008-10-27	No	Develop
Newark Star-Ledger	HIV Resistance	An HIV drug born of Jersey native's research	http://infoweb.newsbank.com/resources/doc/nb/news/12BE6C42C02DE600?p=AWNB	Miriam Hill, Philadelphia Inquirer	2009-11-08	No	Develop, Mutate
Newark Star-Ledger	HIV Resistance	EVERYBODY IN THE (PATENT) POOL	http://infoweb.newsbank.com/resources/doc/nb/news/136F685E90180E60?p=AWNB	N/A	2011-05-01	No
Newark Star-Ledger	HIV Resistance	HIV drug clears key hurdle for use as prevention	http://infoweb.newsbank.com/resources/doc/nb/news/13EBAB82F4E221B8?p=AWNB	Lindsey Tanner, ASSOCIATED PRESS	2012-05-12	No	Develop
Newark Star-Ledger	HIV Resistance	Preventive HIV drug gets FDA's approval - Pill being heralded as a turning point	http://infoweb.newsbank.com/resources/doc/nb/news/14016B6B7A1848B0?p=AWNB	Matthew Perrone, ASSOCIATED PRESS	2012-07-17	No	Develop
Newark Star-Ledger	HIV Resistance	To solve a deadly puzzle - HIV researcher hopes grants help him find the missing pieces to a cure	http://infoweb.newsbank.com/resources/doc/nb/news/14455222657854B8?p=AWNB	Dan Goldberg and Alexi Friedman, STAR-LEDGER STAFF	2013-02-08	Yes
Philadelphia Inquirer	HIV Resistance	RESEARCHERS SAY NEW DRUG MAY BE TOOL AGAINST AIDS	http://infoweb.newsbank.com/resources/doc/nb/news/0EB95F94BA5F9E42?p=AWNB	Associated Press	1989-07-28	No	Develop
Philadelphia Inquirer	HIV Resistance	BATTLING AIDS VIA AN ENZYME SCIENTISTS AT SMITHKLINE BEECHAM ARE IN A RACE TO FIND A NEW TREATMENT FOR AIDS. THEIR VEHICLE IS CALLED PROTEASE.	http://infoweb.newsbank.com/resources/doc/nb/news/0EB2A045995C83E6?p=AWNB	Marian Uhlman	1990-04-29	No	Develop
Philadelphia Inquirer	HIV Resistance	A TIME OF MILD OPTIMISM ON AIDS TREATMENT	http://infoweb.newsbank.com/resources/doc/nb/news/0EB2A088D0F77B90?p=AWNB	Donald C. Drake	1990-06-24	No	Develop
Philadelphia Inquirer	HIV Resistance	STUDY: EARLY AZT USE DOESN'T BOOST LIFE SPAN	http://infoweb.newsbank.com/resources/doc/nb/news/0EB2A2FA2E33A681?p=AWNB	Robert Steinbrook	1992-02-13	No	Develop
Philadelphia Inquirer	HIV Resistance	AIDS PATIENTS SHOWING INCREASED RESISTANCE TO ANTIVIRAL DRUG MORE PATIENTS WHO HAVE NEVER TAKEN THE DRUG AZT HAVE A VIRUS THAT RESISTS THE MEDICINE. NEW DRUGS ARE NEEDED TO FIGHT THE DISEASE, SCIENTISTS SAID	http://infoweb.newsbank.com/resources/doc/nb/news/0EB2A4435B350A88?p=AWNB	Paul Recer	1993-01-01	No	Develop
Philadelphia Inquirer	HIV Resistance	AIDS REPORT BRINGS A SURGE OF HOPE \ PATIENTS ARE CLAMORING TO JOIN TRIALS OF A NEW TREATMENT. IT STOPS THE VIRUS - IN A TEST TUBE	http://infoweb.newsbank.com/resources/doc/nb/news/0EB2A48EB580D977?p=AWNB	Huntly Collins	1993-03-06	No	Develop, Mutate
Philadelphia Inquirer	HIV Resistance	HIV DRUG SUCCESSFUL IN LAB IS SET FOR HUMAN TESTING	http://infoweb.newsbank.com/resources/doc/nb/news/0EB2A4A72F801063?p=AWNB	Paul Recer	1993-03-24	No	Mutate
Philadelphia Inquirer	HIV Resistance	STRAINS OF VIRUS ARE RESISTANT TO AZT THE POSSIBILITY WAS RAISED BY AIDS RESEARCHERS BEFORE. A STUDY OFFERS CLEAR EVIDENCE THAT IT HAS HAPPENED	http://infoweb.newsbank.com/resources/doc/nb/news/0EB2A4BF0421B197?p=AWNB	Daniel Q. Haney	1993-04-22	Yes	Mutate
Philadelphia Inquirer	HIV Resistance	THE AIDS EPIDEMIC: YEARS OF RESEARCH, MUCH YET UNKNoWN BACK TO THE BASICS AS THE TOLL RISES	http://infoweb.newsbank.com/resources/doc/nb/news/0EB2A4EFF3F6D057?p=AWNB	Huntly Collins	1993-06-06	No	Develop, Mutate
Philadelphia Inquirer	HIV Resistance	AZT EFFECT ON HIV HELD TO BE LIMITED A EUROPEAN STUDY FOUND THAT GIVING THE LEADING ANTI-AIDS DRUG IN EARLY STAGES OF INFECTION PROVIDED No MEASURABLE BENEFIT.	http://infoweb.newsbank.com/resources/doc/nb/news/0EB2A4F3FAAC99E2?p=AWNB	Huntly Collins	1993-06-09	No	Develop
Philadelphia Inquirer	HIV Resistance	U.S. STEPS UP ITS EFFORTS TO FIGHT AIDS \ THE AIM IS TO SPEED DRUG DevelopMENT. IT WON'T BE 'JUST ANoTHER' PANEL, DONNA SHALALA VOWED.	http://infoweb.newsbank.com/resources/doc/nb/news/0EB2A58F508D9722?p=AWNB	Huntly Collins	1993-12-01	No	Develop
Philadelphia Inquirer	HIV Resistance	EXPERIMENTAL DRUG POTENT AGAINST HIV, SCIENTISTS SAY IN A TRIAL, IT SIGNIFICANTLY REDUCED THE VIRUS IN INFECTED PEOPLE. IT IS BEING TESTED AT 5 SITES, INCLUDING PENN	http://infoweb.newsbank.com/resources/doc/nb/news/0EB2A59B54668387?p=AWNB	Huntly Collins	1993-12-16	No	Develop
Philadelphia Inquirer	HIV Resistance	SCIENTISTS SAY MUTANT HIV STRAINS COULD RESIST THEIR PROMISING DRUG MERCK RESEARCHERS MAY INCREASE DOSES OF THE DRUG. IT INHIBITS AN ENZYME VITAL TO THE AIDS VIRUS.	http://infoweb.newsbank.com/resources/doc/nb/news/0EB2A5C9AF3F8D97?p=AWNB	Huntly Collins	1994-02-25	No	Develop, Mutate
Philadelphia Inquirer	HIV Resistance	AZT STUDY GIVES EXPECTANT MOTHERS HOPE IF HIV-POSITIVE PREGNANT WOMEN TAKE THE DRUG, THEIR BABIES MAY NoT BE INFECTED. MANY ARE WILLING TO TRY.	http://infoweb.newsbank.com/resources/doc/nb/news/0EB2A5D2814226CE?p=AWNB	Huntly Collins	1994-03-08	No	Develop
Philadelphia Inquirer	HIV Resistance	SCIENTISTS FIND COMPOUNDS THAT MAY BLOCK AIDS VIRUS A FRENCH LAB OF RHONE-POULENC MADE THE DISCOVERY. \ EXPERTS ARE HOPEFUL, BUT HUMAN TESTS MUST STILL BE DONE	http://infoweb.newsbank.com/resources/doc/nb/news/0EB2A5ED064183CA?p=AWNB	Huntly Collins	1994-04-26	No	Develop
Philadelphia Inquirer	HIV Resistance	STUDIES: NEW AIDS DRUG BOOSTS THE POWER OF AZT TO FIGHT VIRUS	http://infoweb.newsbank.com/resources/doc/nb/news/0EB32B48DC95E81A?p=AWNB	Randi Hutter Epstein	1994-11-21	No	Develop
Philadelphia Inquirer	HIV Resistance	REPORT DEALS SETBACK TO AIDS MEDICINE \ A COMPOUND IS SUPPOSED TO BATTLE THE AIDS VIRUS. IT MAY ACTUALLY ASSIST IT, SCIENTISTS SAY.	http://infoweb.newsbank.com/resources/doc/nb/news/0EB32BCC473BB731?p=AWNB	Donna Shaw	1995-04-06	No	Develop, Mutate
Philadelphia Inquirer	HIV Resistance	APPROVAL SOUGHT FOR NEW AIDS DRUG, 3TC THE DRUG IS USED WITH AZT. THE RESULT IS HIGHER IMMUNITY AND LOWER VIRUS, THE FDA WAS TOLD.	http://infoweb.newsbank.com/resources/doc/nb/news/0EB32C94F96A33DF?p=AWNB	Lauran Neergaard	1995-11-07	No	Develop
Philadelphia Inquirer	HIV Resistance	TREATMENT FOR AIDS APPROVED A DRUG PROLONGS THE EFFECTIVENESS OF AZT WHEN THE TWO ARE PAIRED. THE FDA ACTED QUICKLY	http://infoweb.newsbank.com/resources/doc/nb/news/0EB32CA38478D1F5?p=AWNB	Kim I. Mills	1995-11-21	No	Develop
Philadelphia Inquirer	HIV Resistance	HOPES RISING FOR AIDS TO BECOME A MANAGEABLE DISEASE< NEW DRUGS, MORE SOPHISTICATED TESTS, AND BETTER< UNDERSTANDING MAY HELP PEOPLE LIVE LONGER	http://infoweb.newsbank.com/resources/doc/nb/news/0EB32CDCF67E9E81?p=AWNB	Huntly Collins	1996-01-28	No	Develop, Mutate
Philadelphia Inquirer	HIV Resistance	COMBINATION OF AIDS DRUGS SHOWS SHARP GAINS	http://infoweb.newsbank.com/resources/doc/nb/news/0EB32CDDF10B56B9?p=AWNB	Huntly Collins	1996-01-30	No	Mutate
Philadelphia Inquirer	HIV Resistance	8 YEARS AND $700 MILLION LATER, HOW A BETTER DRUG WAS FOUND< THIS BREAKTHROUGH MIGHT SAVE THE LIVES OF< PEOPLE ONCE DOOMED BY AN HIV-POSITIVE DIAGNoSIS	http://infoweb.newsbank.com/resources/doc/nb/news/0EB32D0C31EDDE0C?p=AWNB	Huntly Collins	1996-03-17	Yes	Develop, Mutate
Philadelphia Inquirer	HIV Resistance	A NEW DRUG IN THE RACE WITH DEATH< RESEARCHERS AT MERCK & CO. WERE CLOSING IN ON A NEW MEDICINE,< BUT AIDS PATIENTS WERE DYING DAILY. A GROUP OF ACTIVISTS< FELT THEY HAD No TIME TO WAIT. SO THEY STOLE THE FORMULA.	http://infoweb.newsbank.com/resources/doc/nb/news/0EB32D0D488B078A?p=AWNB	Huntly Collins	1996-03-18	No	Mutate
Philadelphia Inquirer	HIV Resistance	NEW DRUG FOR AIDS IS APPROVED< NEVIRAPINE IS THE FIRST OF A NEW CLASS OF MEDICINES.< IT IS TO BE USED IN COMBINATION WITH OTHERS.	http://infoweb.newsbank.com/resources/doc/nb/news/0EB32D6F6C45C76E?p=AWNB	Lauran Neergaard	1996-06-25	No	Develop
Philadelphia Inquirer	HIV Resistance	ON EVE OF AIDS MEETING, HOPES RISE < NEW DRUG COMBINATIONS AND OTHER ADVANCES HAVE EmergeD.< SCIENTISTS NoW CAN IMAGINE ELIMINATING HIV FROM THE INFECTED.	http://infoweb.newsbank.com/resources/doc/nb/news/0EB32D7934F3D880?p=AWNB	Huntly Collins	1996-07-06	No	Mutate
Philadelphia Inquirer	HIV Resistance	WORLD OPEN TO MICROBIAL `CATASTROPHE,' GENETICIST SAYS \ ``WE ARE MORE VULNERABLE THAN EVER'' TO EMERGING INFECTIOUS DISEASES, A PHILA. GATHERING WAS WARNED.	http://infoweb.newsbank.com/resources/doc/nb/news/0EB32E794E1850FD?p=AWNB	Huntly Collins	1997-04-07	Yes	Develop
Philadelphia Inquirer	HIV Resistance	OPTIMISM ON MIX OF AIDS DRUGS \ THE COMBINATION HAD LASTING EFFECTS IN A STUDY, THE RESULTS OF WHICH ARE BEING PRESENTED TODAY.	http://infoweb.newsbank.com/resources/doc/nb/news/0EB32F159B06C761?p=AWNB	Huntly Collins	1997-09-29	No	Develop
Philadelphia Inquirer	HIV Resistance	RESEARCHERS FIND NATURAL MOLECULE PREVENTS HIV FROM INFECTING CELLS	http://infoweb.newsbank.com/resources/doc/nb/news/0EB32F2D343BDCA6?p=AWNB	Paul Recer	1997-10-24	No	Develop
Philadelphia Inquirer	HIV Resistance	THE NEW AIDS DRUGS ARE NoT FOR EVERYONE \ HARD REGIMENS AND RESISTANT VIRAL STRAINS CAN INHIBIT THE ``DRUG COCKTAILS.''	http://infoweb.newsbank.com/resources/doc/nb/news/0EB32F947863DCED?p=AWNB	Huntly Collins	1998-02-09	No	Develop, Mutate
Philadelphia Inquirer	HIV Resistance	2 HIV CASES RESIST NEWEST AIDS DRUGS, CONFERENCE IS TOLD \ THEY WERE IN THE U.S. AND SWITZERLAND. DOCTORS SAY THEY ARE CAUSE FOR CONCERN, NoT PANIC.	http://infoweb.newsbank.com/resources/doc/nb/news/0EB3302C13EF8263?p=AWNB	Huntly Collins	1998-07-01	No	Emerge, Develop, Mutate
Philadelphia Inquirer	HIV Resistance	HIV DRUG APPROVED FOR HEPATITIS B PATIENTS	http://infoweb.newsbank.com/resources/doc/nb/news/0EB33105C3686146?p=AWNB	Lauran Neergaard	1998-12-10	No	Develop
Philadelphia Inquirer	HIV Resistance	STUDIES FIND PEOPLE GETTING MUTANT HIVHide Details	http://infoweb.newsbank.com/resources/doc/nb/news/0EB5CEBC6B55C53A?p=AWNB	Huntly Collins	1999-09-22	No	Develop, Mutate
Philadelphia Inquirer	HIV Resistance	POOR DRUG RESULTS TIED TO PATIENTS, NoT HIV	http://infoweb.newsbank.com/resources/doc/nb/news/0EB734F235BEA3E0?p=AWNB	ASSOCIATED PRESS	2000-01-12	No
Philadelphia Inquirer	HIV Resistance	GARY BAILEY, 48, AIDS EDUCATOR WHO REACHED THOUSANDS	http://infoweb.newsbank.com/resources/doc/nb/news/0EB73576D72B1CDA?p=AWNB	Huntly Collins	2000-04-19	No	Develop
Philadelphia Inquirer	HIV Resistance	STOP-AND-START TREATMENTS FOR AIDS UNDERGOING TESTS	http://infoweb.newsbank.com/resources/doc/nb/news/0EB735EE4C83F9D5?p=AWNB	Daniel Q. Haney, ASSOCIATED PRESS	2000-07-12	No	Emerge, Mutate
Philadelphia Inquirer	HIV Resistance	A BREAK FROM AIDS DRUGS THE IDEA OF HIV PATIENTS' QUITTING THEIR POTENT MEDICINES TEMPORARILY WAS ONCE UNTHINKABLE. BUT NEW DATA SUGGEST THAT 'STRUCTURED TREATMENT INTERRUPTIONS' MIGHT ACTUALLY HELP THEIR PROGNoSIS - AND AT THE LEAST WILL SPARE THEM SIDE EFFECTS FOR A TIME.	http://infoweb.newsbank.com/resources/doc/nb/news/0EB735F3EB8DCD49?p=AWNB	Huntly Collins	2000-07-17	No	Develop, Mutate, Emerge
Philadelphia Inquirer	HIV Resistance	LATEST DRUGS MAY BEAT AIDS VIRUS MUTATIONS	http://infoweb.newsbank.com/resources/doc/nb/news/0EB7371070DABCB0?p=AWNB	INQUIRER WIRE SERVICES	2001-02-06	Yes	Develop
Philadelphia Inquirer	HIV Resistance	MUTANT HIV/AIDS STRAINS ARE SHOWING UP WITH GREATER FREQUENCY THESE RESISTANT FORMS OF THE VIRUS ARE BLAMED ON PROGRESS - THE INCREASED USE OF DRUG COMBINATIONS TO COMBAT IT.	http://infoweb.newsbank.com/resources/doc/nb/news/0EB737130E0867DA?p=AWNB	Daniel Q. Haney	2001-02-08	Yes	Mutate, Emerge
Philadelphia Inquirer	HIV Resistance	Industry pulls back from HIV spotlight - At a special U.N. session, drug makers will insist that AIDS can't be controlled by cheap medicines alone	http://infoweb.newsbank.com/resources/doc/nb/news/0ECDFB7DD08164ED?p=AWNB	Susan Warner	2001-06-24	No
Philadelphia Inquirer	HIV Resistance	HIV problems are predicted	http://infoweb.newsbank.com/resources/doc/nb/news/0EE5624C85931913?p=AWNB	ASSOCIATED PRESS	2001-09-02	No	Develop
Philadelphia Inquirer	HIV Resistance	Breaking a deadly foe's code - The human geNome project has gotten more attention, but similar work with infectious bugs may bring faster benefits.	http://infoweb.newsbank.com/resources/doc/nb/news/0F27FABD3184CB96?p=AWNB	Faye Flam	2002-03-25	Yes
Philadelphia Inquirer	HIV Resistance	AIDS drugs still reach few in Africa - Despite U.N. efforts to expand access and drug firms' agreement to skip profits, progress is slow	http://infoweb.newsbank.com/resources/doc/nb/news/0F294BFD4909CE9D?p=AWNB	Theresa AgoviNo	2002-03-29	No
Philadelphia Inquirer	HIV Resistance	Kevin's Journey - As an addict with AIDS, Kevin Holloman kNows the odds are against him. But he desperately wants to live.	http://infoweb.newsbank.com/resources/doc/nb/news/0F78BDCBB7400B03?p=AWNB	Leonard N. Fleming	2002-11-24	No	Develop
Philadelphia Inquirer	HIV Resistance	Doubts were raised on key drug aimed at AIDS in Africa	http://infoweb.newsbank.com/resources/doc/nb/news/10709706801E1B79?p=AWNB	John Solomon, ASSOCIATED PRESS	2004-12-14	No
Philadelphia Inquirer	HIV Resistance	Drug seduces many to reckless behavior - Crystal meth dulls inhibitions and has led to rising rates of HIV in gay and bisexual men, experts say.	http://infoweb.newsbank.com/resources/doc/nb/news/10850599CA4978F7?p=AWNB	Miriam Hill	2005-02-15	No
Philadelphia Inquirer	HIV Resistance	Flu virus is resistant to two drugs, CDC finds	http://infoweb.newsbank.com/resources/doc/nb/news/10F31CDEC6A51490?p=AWNB	Daniel Yee, ASSOCIATED PRESS	2006-01-15	No	Acquire
Philadelphia Inquirer	HIV Resistance	A pill to block HIV may be near - Two drugs used as treatment show preventive promise in monkeys. The next tests will be with high-risk people	http://infoweb.newsbank.com/resources/doc/nb/news/110A82E57649CBF0?p=AWNB	Marilynn Marchione	2006-03-28	No
Philadelphia Inquirer	HIV Resistance	3 new drugs for HIV are raising hopes	http://infoweb.newsbank.com/resources/doc/nb/news/11A70D2B4C2C5540?p=AWNB	Karl Stark	2007-07-15	No	Develop, Mutate
Philadelphia Inquirer	HIV Resistance	How HIV prevention has defied science	http://infoweb.newsbank.com/resources/doc/nb/news/1271D5F057BAEBB0?p=AWNB	Marie McCullough	2009-03-23	No	Develop, Mutate
Philadelphia Inquirer	HIV Resistance	The long path to Developing an AIDS drug	http://infoweb.newsbank.com/resources/doc/nb/news/12BBAE8AA40BA170?p=AWNB	Miriam Hill	2009-11-02	No	Develop, Mutate
Philadelphia Inquirer	HIV Resistance	Penn, Wistar researchers thwart HIV without antiviral drugs	http://infoweb.newsbank.com/resources/doc/nb/news/13D623D3F13215F0?p=AWNB	Marie McCullough	2012-03-08	No	Develop
Philadelphia Inquirer	HIV Resistance	Group presses its message for AIDS cure	http://infoweb.newsbank.com/resources/doc/nb/news/140A1D2488D5E2F8?p=AWNB	Allyn Gaestel	2012-07-29	No
Riverside Co. Press-Enterprise	HIV Resistance	`Achilles' heel' of HIV found - Drug strategy stops virus reproduction	http://infoweb.newsbank.com/resources/doc/nb/news/0EAF842098CF5EE5?p=AWNB	Lawrence K. Altman	1993-02-18	No	Mutate
Riverside Co. Press-Enterprise	HIV Resistance	AIDS virus learns to resist drug attacks	http://infoweb.newsbank.com/resources/doc/nb/news/0EB041C75CAB497F?p=AWNB	Malcolm Ritter, The Associated Press	1995-04-06	No	Develop
Riverside Co. Press-Enterprise	HIV Resistance	Early tests of `designer' HIV drug positive	http://infoweb.newsbank.com/resources/doc/nb/news/0EB041DEF11C7174?p=AWNB	The Associated Press	1995-05-30	No	Develop, Mutate
Riverside Co. Press-Enterprise	HIV Resistance	AIDS drug test lottery gets federal approval	http://infoweb.newsbank.com/resources/doc/nb/news/0EB041E3E42EF94B?p=AWNB	The Associated Press	1995-06-22	No
Riverside Co. Press-Enterprise	HIV Resistance	Researchers report promising combination of AIDS drugs	http://infoweb.newsbank.com/resources/doc/nb/news/0EB041ECA0C76574?p=AWNB	Paul Recer, The Associated Press	1995-08-04	No	Develop
Riverside Co. Press-Enterprise	HIV Resistance	FDA panel backs new AIDS therapy	http://infoweb.newsbank.com/resources/doc/nb/news/0EB0420450344847?p=AWNB	Lauran NeerGaard, The Associated Press	1995-11-07	No	Develop
Riverside Co. Press-Enterprise	HIV Resistance	No AIDS cure, but big advance - Drugs remove virus from blood	http://infoweb.newsbank.com/resources/doc/nb/news/0EB04255016C19E7?p=AWNB	Lisa M. Krieger	1996-07-12	No	Develop
Riverside Co. Press-Enterprise	HIV Resistance	Molecule may one day fight HIV - It could lead to AIDS drugs or a vaccine, researchers hope. But that is years away.	http://infoweb.newsbank.com/resources/doc/nb/news/0EB042EB9DD27727?p=AWNB	The Associated Press	1997-10-24	No	Develop
Riverside Co. Press-Enterprise	HIV Resistance	HIV hides but it doesn't die - Taking powerful drugs may be a lifetime task	http://infoweb.newsbank.com/resources/doc/nb/news/0EB042F2954BFED1?p=AWNB	Denise Grady	1997-11-14	Yes	Mutate, Develop
Riverside Co. Press-Enterprise	HIV Resistance	AIDS toll plummets - The sharp drop in those dying nationally is mirrored in Riverside and San BernardiNo counties	http://infoweb.newsbank.com/resources/doc/nb/news/0EB0436398C0051A?p=AWNB	The Associated Press	1998-10-08	No	Develop
Riverside Co. Press-Enterprise	HIV Resistance	AIDS virus may defy medication Study finds helpful drugs in jeopardy	http://infoweb.newsbank.com/resources/doc/nb/news/0EB043A6DD910060?p=AWNB	Laura Beil	1999-02-08	No	Develop
Salt Lake City Deseret News	HIV Resistance	FIRM GIVES UP ON EFFECTIVENESS OF AIDS DRUG	http://infoweb.newsbank.com/resources/doc/nb/news/0F36020B32A6CECC?p=AWNB	N/A	1991-11-28	No	Mutate
Salt Lake City Deseret News	HIV Resistance	AGENCY SEEKS AIDS PATIENTS TO TEST DRUG	http://infoweb.newsbank.com/resources/doc/nb/news/0F360745ADF47113?p=AWNB	Associated Press	1993-03-24	No	Mutate
Salt Lake City Deseret News	HIV Resistance	2 DRUGS WORK BETTER THAN AZT ALONE, STUDIES SAY	http://infoweb.newsbank.com/resources/doc/nb/news/0F360BE267CDD34F?p=AWNB	Associated Press	1994-11-21	No	Develop
Salt Lake City Deseret News	HIV Resistance	NEW DRUGS SHOW PROMISE IN BATTLE AGAINST AIDS	http://infoweb.newsbank.com/resources/doc/nb/news/0F360E99ECE848AB?p=AWNB	N/A	1995-01-29	No	Develop, Mutate
Salt Lake City Deseret News	HIV Resistance	NEW DRUGS MAY EXCEL AT STALLING AIDS	http://infoweb.newsbank.com/resources/doc/nb/news/0F360E3B8B80F6D7?p=AWNB	Associated Press	1995-11-05	No	Develop
Salt Lake City Deseret News	HIV Resistance	SCIENTISTS URGE APPROVAL OF NEW AIDS DRUG	http://infoweb.newsbank.com/resources/doc/nb/news/0F360E4207313397?p=AWNB	Associated Press	1995-11-07	No	Develop
Salt Lake City Deseret News	HIV Resistance	AIDS BOY AND FAMILY CLING TO HOPE	http://infoweb.newsbank.com/resources/doc/nb/news/0F3644E2ADC77B91?p=AWNB	N/A	1996-04-09	No	Develop
Salt Lake City Deseret News	HIV Resistance	FDA APPROVES 1ST IN CLASS OF AIDS DRUGS	http://infoweb.newsbank.com/resources/doc/nb/news/0F36456D3387749E?p=AWNB	Associated Press	1996-06-24	No	Mutate
Salt Lake City Deseret News	HIV Resistance	AIDS MAY BECOME CHRONIC DISEASE	http://infoweb.newsbank.com/resources/doc/nb/news/0F36443F5DF06343?p=AWNB	N/A	1996-07-14	No	Acquire, Emerge
Salt Lake City Deseret News	HIV Resistance	AIDS progress in U.S. takes toll south of border	http://infoweb.newsbank.com/resources/doc/nb/news/0F36477DAC3A6592?p=AWNB	N/A	1997-03-23	No	Emerge, Adapt
Salt Lake City Deseret News	HIV Resistance	Magic says drugs, divine intervention help him battle HIV	http://infoweb.newsbank.com/resources/doc/nb/news/0F3647955F04A6FF?p=AWNB	Dara Akiko Tom, Associated Press	1997-04-05	No	Develop
Salt Lake City Deseret News	HIV Resistance	New test can tell if patients with HIV resist certain drugs	http://infoweb.newsbank.com/resources/doc/nb/news/0F3647F537683910?p=AWNB	Reuter News Service	1997-05-29	No
Salt Lake City Deseret News	HIV Resistance	Researchers find microbes evolving to resist antibodies	http://infoweb.newsbank.com/resources/doc/nb/news/0F3648B22E8D3C68?p=AWNB	Joe Bauman	1997-09-12	Yes	Develop
Salt Lake City Deseret News	HIV Resistance	Scientists find molecule to harness AIDS virus	http://infoweb.newsbank.com/resources/doc/nb/news/0F3647172898C245?p=AWNB	N/A	1997-10-25	No	Develop
Salt Lake City Deseret News	HIV Resistance	Array of drugs changing the face of HIV epidemic	http://infoweb.newsbank.com/resources/doc/nb/news/0F364BAB9D044B7A?p=AWNB	Jane A. Woodward	1998-06-21	No	Develop
Salt Lake City Deseret News	HIV Resistance	Scientists warn of new, drug-resistant forms of HIV	http://infoweb.newsbank.com/resources/doc/nb/news/0F364EBC3276E356?p=AWNB	Michael Woods, Toledo Blade	1999-01-27	No	Develop, Emerge
Salt Lake City Deseret News	HIV Resistance	HIV mutation thwarts 'cocktail' - But Y. researchers say next generation of drugs is possible	http://infoweb.newsbank.com/resources/doc/nb/news/0F364DE0E31ACDDD?p=AWNB	Lois M. Collins	1999-03-07	Yes	Mutate
Salt Lake City Deseret News	HIV Resistance	St. John's wort seen as HIV drug blocker	http://infoweb.newsbank.com/resources/doc/nb/news/0F365638763E18CE?p=AWNB	Associated Press	2000-02-13	No
Salt Lake City Deseret News	HIV Resistance	Trade tiff threatens free AIDS treatments	http://infoweb.newsbank.com/resources/doc/nb/news/0F369BF29E6081F6?p=AWNB	Associated Press	2001-02-20	No	Develop
Salt Lake City Deseret News	HIV Resistance	New cocktail called equal to standard AIDS drugs	http://infoweb.newsbank.com/resources/doc/nb/news/0F369C184FCBFED6?p=AWNB	Associated Press	2001-03-08	No	Mutate
Salt Lake City Deseret News	HIV Resistance	U. professor gets grant for AIDS study	http://infoweb.newsbank.com/resources/doc/nb/news/0F369C26010D9F2F?p=AWNB	Joe Bauman	2001-03-12	No	Develop
Salt Lake City Deseret News	HIV Resistance	U.S. study Notes risk of AIDS resurgence	http://infoweb.newsbank.com/resources/doc/nb/news/0F369CC566E029E7?p=AWNB	Paul Simao, Reuters	2001-06-03	No	Develop, Mutate
Salt Lake City Deseret News	HIV Resistance	Think long-term on HIV-drug investments	http://infoweb.newsbank.com/resources/doc/nb/news/0F369D607B27E894?p=AWNB	Andrew Leckey	2001-08-26	No	Develop, Mutate
Salt Lake City Deseret News	HIV Resistance	Utahns find clue to HIV - Turning off protein prevents disease from spreading<BR>	http://infoweb.newsbank.com/resources/doc/nb/news/0F369DAC11F3CE14?p=AWNB	Lois M. Collins	2001-10-04	No
Salt Lake City Deseret News	HIV Resistance	Three-quarters of new HIV cases in U.S. drug resistan	http://infoweb.newsbank.com/resources/doc/nb/news/0F369E26B29E1BE8?p=AWNB	Reuters News Service	2001-12-19	Yes	Mutate
Salt Lake City Deseret News	HIV Resistance	HIV outsmarts treatment	http://infoweb.newsbank.com/resources/doc/nb/news/0F369E3366CFB6D2?p=AWNB	N/A	2001-12-25	No	Develop, Adapt
Salt Lake City Deseret News	HIV Resistance	Hitting back at HIV - New approach may get patients onto the best drug cocktail more quickly	http://infoweb.newsbank.com/resources/doc/nb/news/0F37F1D12F972BCC?p=AWNB	Emma Ross	2002-01-11	No	Develop
Salt Lake City Deseret News	HIV Resistance	AIDS drugs have short reach - Only a small fraction in Africa getting treatment	http://infoweb.newsbank.com/resources/doc/nb/news/0F37F299C005C960?p=AWNB	Theresa AgoviNo	2002-03-30	No
Salt Lake City Deseret News	HIV Resistance	Doctors, others in Africa fear a ban on AIDS drug	http://infoweb.newsbank.com/resources/doc/nb/news/1070C94E9D15DCB0?p=AWNB	Geoffrey Muleme, Associated Press	2004-12-17	No	Develop
Salt Lake City Deseret News	HIV Resistance	AIDS drug works as first treatment in study	http://infoweb.newsbank.com/resources/doc/nb/news/1137E8FC74A40748?p=AWNB	Marni Leff Kottle	2006-08-13	No	Develop
Salt Lake City Deseret News	HIV Resistance	Lax drug care fortifying HIV, TB?	http://infoweb.newsbank.com/resources/doc/nb/news/114FE8C0A2693C10?p=AWNB	Lois M. Collins	2006-10-25	No	Develop
Salt Lake City Deseret News	HIV Resistance	Scientists discover blood compound that impedes HIV	http://infoweb.newsbank.com/resources/doc/nb/news/118AA40CA77931B0?p=AWNB	N/A	2007-04-21	No	Develop
Salt Lake City Deseret News	HIV Resistance	U. scientist gets grant for HIV research	http://infoweb.newsbank.com/resources/doc/nb/news/11B614FBF28D0A40?p=AWNB	Lois M. Collins	2007-08-31	Yes
San Francisco Chronicle	HIV Resistance	Resistance To AZT Shown By AIDS Virus	http://infoweb.newsbank.com/resources/doc/nb/news/0EB4F14E9E1C8982?p=AWNB	David Perlman	1989-03-15	No	Develop, Emerge, Adapt
San Francisco Chronicle	HIV Resistance	Optimistic Report on Combining AIDS Drugs	http://infoweb.newsbank.com/resources/doc/nb/news/0EB4F183F2808587?p=AWNB	David Perlman	1989-06-08	No	Develop
San Francisco Chronicle	HIV Resistance	New Study on Dosage - Hope for Some Who Take AZT	http://infoweb.newsbank.com/resources/doc/nb/news/0EB4F197CCAA4DCA?p=AWNB	N/A	1989-07-13	No	Develop
San Francisco Chronicle	HIV Resistance	Doctors Say They Rid Patient of HIV	http://infoweb.newsbank.com/resources/doc/nb/news/0EB4F1FAE8378611?p=AWNB	Gina Kolata	1989-12-19	No	Develop
San Francisco Chronicle	HIV Resistance	New AIDS Drug Looks Good in Trials - ddI could replace AZT, which causes side effects in some after prolonged use	http://infoweb.newsbank.com/resources/doc/nb/news/0EB4F26491C1D725?p=AWNB	David Perlman	1990-05-10	No	Develop
San Francisco Chronicle	HIV Resistance	Multiple Drugs May Be Best AIDS Therapy	http://infoweb.newsbank.com/resources/doc/nb/news/0EB4F27FB00AF502?p=AWNB	Sabin Russell	1990-06-21	No	Develop
San Francisco Chronicle	HIV Resistance	Scientists Optimistic At AIDS Conference - Scores of exciting advances Noted de spite fear of the widening scope of killer disease	http://infoweb.newsbank.com/resources/doc/nb/news/0EB4F281A95E1D1E?p=AWNB	David Perlman	1990-06-25	No	Develop
San Francisco Chronicle	HIV Resistance	ddI Can Be Better Than AZT, Test Shows - New drug looks most useful for those merely infected or with early AIDS symptoms	http://infoweb.newsbank.com/resources/doc/nb/news/0EB4F444614A0E57?p=AWNB	David Perlman	1992-08-27	No	Emerge
San Francisco Chronicle	HIV Resistance	Student Finds Novel AIDS Treatment - Combination of 3 drugs prevents virus from reproducing in test tube	http://infoweb.newsbank.com/resources/doc/nb/news/0EB4F4DE6D4AB113?p=AWNB	Lawrence K. Altman	1993-02-18	No	Develop, Mutate
San Francisco Chronicle	HIV Resistance	NINTH INTERNATIONAL CONFERENCE ON AIDS - AIDS Forum Ends With Focus On Prevention - It offered new insights, but No breakthroughs	http://infoweb.newsbank.com/resources/doc/nb/news/0EB4F52194D292AC?p=AWNB	David Perlman	1993-06-12	Yes	Develop
San Francisco Chronicle	HIV Resistance	How to Fight AIDS	http://infoweb.newsbank.com/resources/doc/nb/news/0EB4F526A55CDE0C?p=AWNB	N/A	1993-06-20	No
San Francisco Chronicle	HIV Resistance	Flaws Revealed in Studies of AIDS Drug Combination	http://infoweb.newsbank.com/resources/doc/nb/news/0EB4F538C4CB447A?p=AWNB	Lawrence K. Altman	1993-07-22	No	Develop, Emerge
San Francisco Chronicle	HIV Resistance	`Designer' Drug May Prevent HIV From Infecting New Cells	http://infoweb.newsbank.com/resources/doc/nb/news/0EB4F6AC1A337B65?p=AWNB	David Perlman	1995-05-29	No	Develop, Mutate
San Francisco Chronicle	HIV Resistance	Promising AIDS Drug Available By Lottery - 2,000 patients to get free trial treatment	http://infoweb.newsbank.com/resources/doc/nb/news/0EB4F6B8ACF7EFA3?p=AWNB	David Perlman	1995-06-22	No	Develop
San Francisco Chronicle	HIV Resistance	Combination of AIDS Drugs Most Effective, Researchers Say - Used together, AZT and 3TC keep patients stronger	http://infoweb.newsbank.com/resources/doc/nb/news/0EB4F6CE9B4B2B65?p=AWNB	Associated Press	1995-08-04	No	Develop
San Francisco Chronicle	HIV Resistance	FDA Advisers Urge Approval of New AIDS Drug	http://infoweb.newsbank.com/resources/doc/nb/news/0EB4F6FDC5D30C98?p=AWNB	Associated Press	1995-11-07	No	Develop
San Francisco Chronicle	HIV Resistance	Promising Research on 2 New Types of AIDS Drugs	http://infoweb.newsbank.com/resources/doc/nb/news/0EB4F7024E338129?p=AWNB	Charles Petit	1995-11-17	No	Develop
San Francisco Chronicle	HIV Resistance	FDA Approves New AIDS Drug as Initial Therapy	http://infoweb.newsbank.com/resources/doc/nb/news/0EB4F704D1772D46?p=AWNB	Associated Press	1995-11-21	No	Develop
San Francisco Chronicle	HIV Resistance	FDA OKs New Drug For AIDS - It attacks virus at later stage than AZT	http://infoweb.newsbank.com/resources/doc/nb/news/0EB4F70D761A3F02?p=AWNB	Sabin Russell	1995-12-08	No
San Francisco Chronicle	HIV Resistance	Warning on Combining Drugs - Imbalance can cause fatal liver toxicity in AIDS patients	http://infoweb.newsbank.com/resources/doc/nb/news/0EB4F749758B76D5?p=AWNB	David Perlman	1996-05-02	No	Develop
San Francisco Chronicle	HIV Resistance	AIDS Drug's Demise Ignites Feud	http://infoweb.newsbank.com/resources/doc/nb/news/0EB4F7559B18430F?p=AWNB	Sabin Russell	1996-06-21	Yes	Develop, Mutate
San Francisco Chronicle	HIV Resistance	Encouraged AIDS Researchers Describe Drug Pairings	http://infoweb.newsbank.com/resources/doc/nb/news/0EB4F7598EB8EC6E?p=AWNB	David Perlman	1996-07-11	Yes	Mutate
San Francisco Chronicle	HIV Resistance	Hopeful End To AIDS Conference - Promising reports on newest drugs	http://infoweb.newsbank.com/resources/doc/nb/news/0EB4F759B84952D7?p=AWNB	David Perlman	1996-07-12	No	Develop, Mutate
San Francisco Chronicle	HIV Resistance	Uncertain Life After Certain Death - When new AIDS drugs with extraordinary results were approved earlier this year, few people anticipated one curious side effect: for some, like San Francisco's Peter Di Giulio, regaining health and vitality would trigger a host of troubling fears	http://infoweb.newsbank.com/resources/doc/nb/news/0EB4F77D307D0642?p=AWNB	David Tuller	1996-11-24	No	Develop, Mutate
San Francisco Chronicle	HIV Resistance	New Drugs Raise Hopes at AIDS Conference	http://infoweb.newsbank.com/resources/doc/nb/news/0EB4F7A2DF4CC996?p=AWNB	David Perlman	1997-03-20	No	Develop
San Francisco Chronicle	HIV Resistance	Study Shows Flaws of New AIDS Drugs - 53% failure in S.F. `real-world' test	http://infoweb.newsbank.com/resources/doc/nb/news/0EB4F7D445D0DF4B?p=AWNB	David Perlman	1997-09-30	No
San Francisco Chronicle	HIV Resistance	HIV Can Hide In Cells Despite Drug Treatment - Experts say discovery holds warning, promise	http://infoweb.newsbank.com/resources/doc/nb/news/0EB4F7E157CE5B22?p=AWNB	David Perlman	1997-11-14	No	Develop, Mutate
San Francisco Chronicle	HIV Resistance	Mixture of AIDS Drugs Slashes Death Rates 70%, Study Says	http://infoweb.newsbank.com/resources/doc/nb/news/0EB4F81439575B8F?p=AWNB	David Perlman	1998-03-26	No	Develop, Mutate
San Francisco Chronicle	HIV Resistance	Stanford AIDS Study Called Discouraging - It shows the need for new treatments	http://infoweb.newsbank.com/resources/doc/nb/news/0EB4F82C0ECBB434?p=AWNB	Sabin Russell	1998-06-01	No	Develop, Mutate
San Francisco Chronicle	HIV Resistance	Poor Nations Losing Battle Against AIDS - Many can't afford new treatments	http://infoweb.newsbank.com/resources/doc/nb/news/0EB4F833C5EC9B8D?p=AWNB	David Perlman	1998-06-24	No	Develop, Mutate
San Francisco Chronicle	HIV Resistance	AIDS Discovery Worries Scientists - S.F. man infected with drug-resistant strain of HIV	http://infoweb.newsbank.com/resources/doc/nb/news/0EB4F8355F24968A?p=AWNB	David Perlman	1998-07-01	No	Develop, Emerge, Mutate
San Francisco Chronicle	HIV Resistance	Genentech COO to Head Biotech Startup - ViroLogic sells test to detect HIV strains	http://infoweb.newsbank.com/resources/doc/nb/news/0EB4F8D16B282E9E?p=AWNB	Tom Abate	1999-09-23	No
San Francisco Chronicle	HIV Resistance	World Trade Showdown - Activists, Industry Split Over AIDS Drugs - Manufacturers fight affordable access	http://infoweb.newsbank.com/resources/doc/nb/news/0EB4F8E78A154715?p=AWNB	Sabin Russell	1999-11-24	No	Develop
San Francisco Chronicle	HIV Resistance	Some AIDS Drugs Found to Cause Liver Damage - Study shows 10% of patients must quit therapy	http://infoweb.newsbank.com/resources/doc/nb/news/0EB4F8FF73BEAAF2?p=AWNB	Carl T. Hall	2000-01-05	No
San Francisco Chronicle	HIV Resistance	AIDS Drug Regimen Examined - A break appears to do No harm, provides respite from side-effects	http://infoweb.newsbank.com/resources/doc/nb/news/0EB4F93DCD31F111?p=AWNB	Sabin Russell	2000-07-12	No	Develop, Mutate
San Francisco Chronicle	HIV Resistance	AIDS Pill Lowers HIV Levels in Clinical Trials	http://infoweb.newsbank.com/resources/doc/nb/news/0EB4F99422584884?p=AWNB	Tom Abate	2001-02-21	No
San Francisco Chronicle	HIV Resistance	The Big Question Now in Anti-HIV Therapy - When?	http://infoweb.newsbank.com/resources/doc/nb/news/0EB4F994CBFBEF58?p=AWNB	Jay A. Levy	2001-02-23	No	Emerge
San Francisco Chronicle	HIV Resistance	AIDS maintaining its grip in U.S., latest figures show - Disease's decline has flattened out	http://infoweb.newsbank.com/resources/doc/nb/news/0EDE3F74562215BD?p=AWNB	Christopher Heredia	2001-08-14	No	Develop
San Francisco Chronicle	HIV Resistance	HIV's drug resistance increasing rapidly - UC study forecasts 42% of S.F. cases affected by 2005	http://infoweb.newsbank.com/resources/doc/nb/news/0EE3D9ADB03FEB90?p=AWNB	Sabin Russell	2001-08-31	No	Develop, Mutate, Acquire
San Francisco Chronicle	HIV Resistance	FDA panel to vote on AIDS drug	http://infoweb.newsbank.com/resources/doc/nb/news/0EEEBB537927FCEA?p=AWNB	Tom Abate	2001-10-03	No	Develop
San Francisco Chronicle	HIV Resistance	FDA panel endorses Gilead's AIDS drug	http://infoweb.newsbank.com/resources/doc/nb/news/0EEF0F920EBACDFF?p=AWNB	Tom Abate	2001-10-04	No	Develop
San Francisco Chronicle	HIV Resistance	Gilead HIV drug OKd for wide use - Viread allowed for initial therapy	http://infoweb.newsbank.com/resources/doc/nb/news/0EF6A12E4B96AB44?p=AWNB	Tom Abate	2001-10-27	No	Develop
San Francisco Chronicle	HIV Resistance	Mutant virus mars positive AIDS research - Vaccine fails to save one of eight monkeys	http://infoweb.newsbank.com/resources/doc/nb/news/0F11AF2514533B37?p=AWNB	Sabin Russell	2002-01-17	No	Develop, Emerge, Mutate
San Francisco Chronicle	HIV Resistance	Gilead seeks FDA approval for hepatitis B treatment	http://infoweb.newsbank.com/resources/doc/nb/news/0F26C77462B9D4DD?p=AWNB	Tom Abate	2002-03-22	No	Develop
San Francisco Chronicle	HIV Resistance	Danger at the border - From North and south, people flock to Tijuana - along with HIV, which flourishes in an area with little prevention or treatment	http://infoweb.newsbank.com/resources/doc/nb/news/0F2C0697F9D0FDC8?p=AWNB	Tyche Hendricks	2002-04-07	No
San Francisco Chronicle	HIV Resistance	Mutant HIV in S.F. men resists drugs - Researchers say new viral strains Adapting quickly	http://infoweb.newsbank.com/resources/doc/nb/news/0F4A028B8F964AF8?p=AWNB	Sabin Russell	2002-07-07	Yes	Develop, Adapt
San Francisco Chronicle	HIV Resistance	AIDS drug gets quick approval - Fuzeon geared toward failing patients; $20,000 price dismays activists	http://infoweb.newsbank.com/resources/doc/nb/news/0F9C6F203208632D?p=AWNB	Sabin Russell	2003-03-14	No	Develop
San Francisco Chronicle	HIV Resistance	Tiny protein could be big piece of AIDS puzzle - Researchers are racing to find how Vif helps virus defeat immune system	http://infoweb.newsbank.com/resources/doc/nb/news/0FC7028F5FDB4BB9?p=AWNB	Sabin Russell	2003-07-21	Yes	Develop
San Francisco Chronicle	HIV Resistance	Study finds 'drug holidays' may harm AIDS patients - Taking a break raises odds of getting sicker	http://infoweb.newsbank.com/resources/doc/nb/news/0FD3761E6A28789D?p=AWNB	Sabin Russell	2003-08-28	No	Develop, Mutate
San Francisco Chronicle	HIV Resistance	Uganda's AIDS drug program may become Africa's model - In rural areas, direct home delivery of medicine saves lives	http://infoweb.newsbank.com/resources/doc/nb/news/0FF4C20C17698223?p=AWNB	Sabin Russell	2003-12-07	No	Develop
San Francisco Chronicle	HIV Resistance	Pill to protect babies from HIV may Not help mothers later - Treatment can lead to disease that's resistant	http://infoweb.newsbank.com/resources/doc/nb/news/100A2FCEA05C057A?p=AWNB	Sabin Russell	2004-02-10	No	Develop
San Francisco Chronicle	HIV Resistance	Potent HIV strain found -- U.S. health alert issued	http://infoweb.newsbank.com/resources/doc/nb/news/1083E3604C6FDA43?p=AWNB	David Perlman	2005-02-12	No
San Francisco Chronicle	HIV Resistance	2 promising new AIDS drugs - Strong results in studies, including one by Foster City company	http://infoweb.newsbank.com/resources/doc/nb/news/10FAC3D18406AF78?p=AWNB	Sabin Russell	2006-02-09	No	Develop, Mutate
San Francisco Chronicle	HIV Resistance	Reports on new type of AIDS drugs offer hope to patients - Integrase inhibitors could help those with resistance to other medication	http://infoweb.newsbank.com/resources/doc/nb/news/10FB17280E0EB1A0?p=AWNB	Sabin Russell	2006-02-10	No	Develop
San Francisco Chronicle	HIV Resistance	AIDS AT 25	http://infoweb.newsbank.com/resources/doc/nb/news/1120A7FEF4142B58?p=AWNB	Sabin Russell	2006-06-04	No	Develop
San Francisco Chronicle	HIV Resistance	JEFF GETTY: 1957-2006 - AIDS activist succumbs - Getty pushed for experimental treatment protocols	http://infoweb.newsbank.com/resources/doc/nb/news/114C7B4C123BE478?p=AWNB	Sabin Russell	2006-10-15	No	Develop
San Francisco Chronicle	HIV Resistance	A crowded field in cancer research - Hundreds of test therapies in the works	http://infoweb.newsbank.com/resources/doc/nb/news/115469CBCFE7D2B8?p=AWNB	Bernadette Tansey	2006-11-08	Yes	Develop, Mutate
San Francisco Chronicle	HIV Resistance	HEALTH - S.F. could see more cases of drug-resistant strains	http://infoweb.newsbank.com/resources/doc/nb/news/12D4076B8D0F0480?p=AWNB	Erin Allday	2010-01-15	Yes	Develop, Emerge
St. Paul Pioneer Press	HIV Resistance	DRUG DDI, NEW AIDS WEAPON, IS HAILED	http://infoweb.newsbank.com/resources/doc/nb/news/0EB5D8CBA554C7D0?p=AWNB	Associated Press	1989-07-28	No	Develop
St. Paul Pioneer Press	HIV Resistance	AZT-RESISTANT VIRUS CREATES NEED FOR NEW AIDS DRUGS, DOCTORS SAY	http://infoweb.newsbank.com/resources/doc/nb/news/0EB5DC734445B7F5?p=AWNB	Paul Recer	1993-01-01	No	Develop
St. Paul Pioneer Press	HIV Resistance	AIDS VIRUS IS NEVER DORMANT//DISCOVERY COULD PROMPT EARLIER DRUG TREATMENT	http://infoweb.newsbank.com/resources/doc/nb/news/0EB5DCB1831F4149?p=AWNB	Tom Majeski	1993-03-25	No	Develop
St. Paul Pioneer Press	HIV Resistance	NEW AIDS DRUG BOOSTS AZT POWER// 3TC WORKS BEST TEAMED WITH AZT	http://infoweb.newsbank.com/resources/doc/nb/news/0EB5DE721B2AB3FF?p=AWNB	Associated Press	1994-11-21	No	Develop
St. Paul Pioneer Press	HIV Resistance	HIV DevelopS RESISTANCE TO RELATED DRUGS WHEN EXPOSED TO ONE, STUDY FINDS	http://infoweb.newsbank.com/resources/doc/nb/news/0EB5DEECC1CA09EA?p=AWNB	ASSOCIATED PRESS	1995-04-06	No	Develop
St. Paul Pioneer Press	HIV Resistance	AIDS TREATMENT LOTTERY WILL OFFER HOPE TO 2,000//DRUG REDUCES HIV LEVELS, RAISES CD4S	http://infoweb.newsbank.com/resources/doc/nb/news/0EB5DF3203BFD03A?p=AWNB	Associated Press	1995-06-22	No
St. Paul Pioneer Press	HIV Resistance	DRUG COMBINATION FOUND EFFECTIVE AGAINST HIV VIRUS//TREATMENT DROPS VIRAL RESISTANCE TO POPULAR AZT	http://infoweb.newsbank.com/resources/doc/nb/news/0EB5DF5826F6F8DA?p=AWNB	ASSOCIATED PRESS	1995-08-04	No	Develop
St. Paul Pioneer Press	HIV Resistance	NEW AIDS THERAPY NEARS APPROVAL//SCIENTISTS BACK DRUG THAT WORKS WITH AZT TO REDUCE HIV IN BLOOD	http://infoweb.newsbank.com/resources/doc/nb/news/0EB5DFAF98E2C8F5?p=AWNB	Associated Press	1995-11-07	No	Develop
St. Paul Pioneer Press	HIV Resistance	POWERFUL NEW AIDS DRUG TO BE AVAILABLE SATURDAY	http://infoweb.newsbank.com/resources/doc/nb/news/0EB5DFCC6BC5B2E2?p=AWNB	ASSOCIATED PRESS	1995-12-08	No	Develop
St. Paul Pioneer Press	HIV Resistance	THE `NEW WELLNESS'//CURRENT HIV AND AIDS THERAPIES ARE WORKING WELL, PROMISING PROLONGED LIVES FOR PEOPLE LIKE TOM KANE. BUT THAT PROMISE HAS BROUGHT WITH IT A HOST OF QUESTIONS AND UNCERTAINTIES.	http://infoweb.newsbank.com/resources/doc/nb/news/0EB5E1A3E421C464?p=AWNB	Rhoda Fukushima	1997-05-17	No	Develop
St. Paul Pioneer Press	HIV Resistance	MOLECULE THAT CAN BLOCK AIDS IDENTIFIED	http://infoweb.newsbank.com/resources/doc/nb/news/0EB5E22AD5E1DBC5?p=AWNB	Associated Press	1997-10-24	No	Develop
St. Paul Pioneer Press	HIV Resistance	TESTS ID STRAINS OF AIDS	http://infoweb.newsbank.com/resources/doc/nb/news/0EB5E2F17B4A72C7?p=AWNB	St. Paul Pioneer Press	1998-06-24	No	Mutate
St. Paul Pioneer Press	HIV Resistance	DRUG-RESISTANT HIV RATE TO JUMP//RESEARCHERS SAY 42 PERCENT OF SUFFERERS IN SAN FRANCISCO BY 2005 WILL BE AFFECTED	http://infoweb.newsbank.com/resources/doc/nb/news/0EE5C9282FE17D58?p=AWNB	JANE BRODY	2002-03-25	No	Develop, Acquire
St. Paul Pioneer Press	HIV Resistance	BEYOND THE HEADLINES - SAN FRANCISCO IS CHANGING FACE OF HIV TREATMENT - The city that was once ground zero in the AIDS epidemic Now has only a few hundred new cases a year, the result of aggressive and creative programs.	http://infoweb.newsbank.com/resources/doc/nb/news/1588150204A2E7A8?p=AWNB	Donald G. McNeil Jr.	2015-10-12	No	Develop
USA Today	HIV Resistance	UPJOHN ANNoUNCES POSSIBLE NEW DRUG IN FIGHT AGAINST AIDS	http://infoweb.newsbank.com/resources/doc/nb/news/1280D5954AC20740?p=AWNB	Gregory Gordon	1992-07-22	No	Mutate, Acquire
USA Today	HIV Resistance	HIV-POSITIVE VOLUNTEERS LINING UP FOR DRUG TRIALS	http://infoweb.newsbank.com/resources/doc/nb/news/1280D59963967D28?p=AWNB	Cynthia Floyd	1992-07-29	No	Develop
USA Today	HIV Resistance	HIV hits the lymph Nodes fast	http://infoweb.newsbank.com/resources/doc/nb/news/0EB771A7AB05AAEC?p=AWNB	Anita Manning	1993-03-25	No
USA Today	HIV Resistance	Researcher rejects claims about African interferon	http://infoweb.newsbank.com/resources/doc/nb/news/0EB771BAF7F2860E?p=AWNB	Kim Painter	1993-06-14	No	Develop
USA Today	HIV Resistance	HIV-positive wait, watch	http://infoweb.newsbank.com/resources/doc/nb/news/0EB772246BC3F6C1?p=AWNB	NA	1994-08-05	No	Develop
USA Today	HIV Resistance	New AIDS drugs endorsed with limits	http://infoweb.newsbank.com/resources/doc/nb/news/0EB77289A37689D4?p=AWNB	Kim Painter	1995-11-08	No	Develop
USA Today	HIV Resistance	Therapy `best' yet to slow AIDS	http://infoweb.newsbank.com/resources/doc/nb/news/0EB7729E1DE82A0B?p=AWNB	Kim Painter	1996-01-30	No	Develop
USA Today	HIV Resistance	How soon to treat HIV infection?	http://infoweb.newsbank.com/resources/doc/nb/news/0EB772BB9FCD35B8?p=AWNB	Kim Painter	1996-07-11	No
USA Today	HIV Resistance	Drugs used in combination to treat AIDS	http://infoweb.newsbank.com/resources/doc/nb/news/127E6EA5F799C7A8?p=AWNB	Elizabeth Neus	1996-11-25	No	Develop
USA Today	HIV Resistance	1996 hailed as breakthrough year in AIDS treatment	http://infoweb.newsbank.com/resources/doc/nb/news/127E6EA600DF7ED8?p=AWNB	Elizabeth Neus	1996-11-25	No	Develop, Mutate
USA Today	HIV Resistance	Triple assault on AIDS Support for early viral suppression	http://infoweb.newsbank.com/resources/doc/nb/news/0EB772EB0215844A?p=AWNB	Kim Painte	1997-01-27	No	Develop
USA Today	HIV Resistance	No AIDS 'cure' yet, studies caution Virus stays in cells despite new drugs	http://infoweb.newsbank.com/resources/doc/nb/news/0EB77320C5245390?p=AWNB	Kim Painter	1997-11-14	No	Develop
USA Today	HIV Resistance	Protease inhibitors for AIDS treatment are cruelly arbitrary saviors	http://infoweb.newsbank.com/resources/doc/nb/news/127DD9F62F0CD490?p=AWNB	Michael H. Hodges	1998-01-06	No	Develop, Mutate
USA Today	HIV Resistance	Anti-HIV drugs hobbled by drug-resistant strains	http://infoweb.newsbank.com/resources/doc/nb/news/0EB773543929A768?p=AWNB	Steve Sternberg	1998-07-01	No	Mutate
USA Today	HIV Resistance	Resistant HIV strains overcoming treatments	http://infoweb.newsbank.com/resources/doc/nb/news/127D893930E0D528?p=AWNB	Cathey O'Donnell	1999-08-04	Yes	Mutate
USA Today	HIV Resistance	Resistant HIV isn't only cause of drug failure Many patients don't stick to prescription regimen	http://infoweb.newsbank.com/resources/doc/nb/news/0EB773E32DF4E04D?p=AWNB	Steve Sternberg	2000-01-12	Yes	Develop
USA Today	HIV Resistance	Battle lines drawn outside cells	http://infoweb.newsbank.com/resources/doc/nb/news/0EB773E7D5ED7784?p=AWNB	Steve Sternberg	2000-02-01	No	Develop
USA Today	HIV Resistance	U.N. to buy, sell AIDS drugs for poor nations	http://infoweb.newsbank.com/resources/doc/nb/news/0EB7740B59ECBFBF?p=AWNB	Steve Sternberg	2000-07-10	No
USA Today	HIV Resistance	Immediate drug barrage can keep HIV at bay	http://infoweb.newsbank.com/resources/doc/nb/news/0EB7741C83A01D35?p=AWNB	Steve Sternberg	2000-09-28	No
USA Today	HIV Resistance	Anti-HIV drugs reaching limit Complications increasing in advanced stages	http://infoweb.newsbank.com/resources/doc/nb/news/0EB7743F36562154?p=AWNB	Steve Sternberg	2001-02-07	No	Mutate
USA Today	HIV Resistance	2 decades later, No AIDS vaccine	http://infoweb.newsbank.com/resources/doc/nb/news/0EE59FB94056ADBE?p=AWNB	Steve Sternberg	2001-09-05	No	Develop, Mutate
USA Today	HIV Resistance	Increased drug resistance makes HIV difficult to treat	http://infoweb.newsbank.com/resources/doc/nb/news/0F083CA9892A20A5?p=AWNB	Steve Sternberg	2001-12-19	Yes
USA Today	HIV Resistance	Patients get a shot at beating AIDS virus	http://infoweb.newsbank.com/resources/doc/nb/news/0F26365C00BDFCE4?p=AWNB	Steve Sternberg	2002-03-19	No	Develop, Mutate
USA Today	HIV Resistance	An all-out war against AIDS	http://infoweb.newsbank.com/resources/doc/nb/news/0F3463C3F1961162?p=AWNB	Steve Sternberg	2002-05-01	Yes
USA Today	HIV Resistance	Anti-HIV 'cocktail' decided	http://infoweb.newsbank.com/resources/doc/nb/news/0FF62F3C51B86868?p=AWNB	Steve Sternberg	2003-12-11	No	Develop
USA Today	HIV Resistance	Two-thirds more people Now get AIDS treatment	http://infoweb.newsbank.com/resources/doc/nb/news/107E50A27B80735B?p=AWNB	Steve Sternberg	2005-01-27	No
USA Today	HIV Resistance	Anti-AIDS drug for newborns gets boost - Nevirapine combo cuts mom-to-baby transmission	http://infoweb.newsbank.com/resources/doc/nb/news/11E5E9794A62BCB8?p=AWNB	Steve Sternberg	2005-04-11	No
USA Today	HIV Resistance	Some in Africa expect miracles from Obama - Experts, leaders try to manage hopes with warnings that U.S. has many problems of its own	http://infoweb.newsbank.com/resources/doc/nb/news/1246298B00084148?p=AWNB	Zoe Alsop	2008-11-10	No	Develop
USA Today	HIV Resistance	Complacency is the biggest barrier to ending AIDS - Patients are much less likely to spread HIV if they get treatment, but many don't	http://infoweb.newsbank.com/resources/doc/nb/news/13B5CF414018AC68?p=AWNB	Anita Manning	2011-12-01	No
USA Today	HIV Resistance	What could Truvada mean for the fight against AIDS? - Effectiveness is established, but there are still obstacles	http://infoweb.newsbank.com/resources/doc/nb/news/13FA5B33637EEDE8?p=AWNB	Anita Manning	2012-06-26	No	Develop
USA Today	HIV Resistance	Anti-HIV drugs dry up in Venezuela	http://infoweb.newsbank.com/resources/doc/nb/news/14DC4EA7608633D0?p=AWNB	Peter Wilson	2014-05-09	No	Acquire, Develop
Wall Street Journal	HIV Resistance	Health: AIDS Patients Develop Viruses Resistant to AZT	http://search.proquest.com/wallstreetjournal/docview/398127349/fulltext/2144E16F36814C34PQ/91?accountid=14512	Marilyn Chase	1989-03-14	No	Develop, Emerge, Mutate
Wall Street Journal	HIV Resistance	AIDS Drug AZT Is Found Effective At Half Dosage	http://search.proquest.com/wallstreetjournal/docview/398085489/fulltext/65FEDECE4E86447APQ/342?accountid=14512	By Marilyn Chase. Wall Street Journal	1989-07-13	No	Develop
Wall Street Journal	HIV Resistance	AIDS Research	http://search.proquest.com/wallstreetjournal/docview/398244622/fulltext/2144E16F36814C34PQ/129?accountid=14512	Marilyn Chase	1991-07-03	No	Develop, Mutate
Wall Street Journal	HIV Resistance	Popular AIDS Treatment Is Illicit Copy of Hoffmann-La Roche's New Drug DDC	http://search.proquest.com/wallstreetjournal/docview/398292229/fulltext/7DC91B666CCE445EPQ/340?accountid=14512	Chase, Marilyn. Wall Street Journal	1991-07-16	No
Wall Street Journal	HIV Resistance	Medicine: Merck Setback Shows Problems of AIDS Drugs	http://search.proquest.com/wallstreetjournal/docview/398248037/fulltext/FF32BE099AAA4C25PQ/247?accountid=14512	Chase, Marilyn	1991-11-26	No	Develop, Mutate
Wall Street Journal	HIV Resistance	Boehringer Is Seen Scaling Back Testing on AIDS Drug Facing Viral Resistance	http://search.proquest.com/wallstreetjournal/docview/398216757/2144E16F36814C34PQ/153?accountid=14512	Chase, Marilyn	1991-11-27	No	Develop, Mutate
Wall Street Journal	HIV Resistance	Study Discloses Limits of AZT In Fighting HIV	http://search.proquest.com/wallstreetjournal/docview/398265622/fulltext/D44DA800125F4E6APQ/51?accountid=14512	Marilyn Chase.	1992-02-13	No
Wall Street Journal	HIV Resistance	Stymied Science: New Discoveries Dim Drug Makers' Hopes For Quick AIDS Cure --- Promising Pharmaceuticals Fall Victim to the Ability Of the Virus to Mutate --- `It's Smarter Than We Are	http://search.proquest.com/wallstreetjournal/docview/398278484/fulltext/2144E16F36814C34PQ/128?accountid=14512	Michael Waldholz	1992-05-26	No	Develop, Emerge, Mutate
Wall Street Journal	HIV Resistance	Health: Detailed Image of AIDS Enzyme May Spur New Drugs	http://search.proquest.com/wallstreetjournal/docview/398299578/fulltext/2144E16F36814C34PQ/123?accountid=14512	Waldholz, Michael	1992-06-26	No	Develop, Mutate
Wall Street Journal	HIV Resistance	J&J unit to test new AIDS drug in mix with others	http://search.proquest.com/wallstreetjournal/docview/398413096/fulltext/2144E16F36814C34PQ/87?accountid=14512	Waldholz, Michael	1993-03-01	No	Develop
Wall Street Journal	HIV Resistance	Medicine: Top Firms Plan Joint Testing Of AIDS Drugs	http://search.proquest.com/wallstreetjournal/docview/398326221/fulltext/2144E16F36814C34PQ/96?accountid=14512	Waldholz, Michael	1993-04-20	No	Develop, Mutate
Wall Street Journal	HIV Resistance	Drug Concern Hopes Its AZT Formula Ends Single Brand for AIDS Treatment	http://search.proquest.com/wallstreetjournal/docview/398447936/fulltext/FF32BE099AAA4C25PQ/243?accountid=14512	Michael Waldholz	1993-05-05	No	Develop
Wall Street Journal	HIV Resistance	Merck drops final bid to Develop drug for AIDS in face if viral resistance	http://search.proquest.com/wallstreetjournal/docview/398470207/2144E16F36814C34PQ/157?accountid=14512	Waldholz, Michael	1993-09-15	No	Mutate
Wall Street Journal	HIV Resistance	AZT Is Found to Slash the Transmission Of HIV From Mothers to Their Infants	http://search.proquest.com/wallstreetjournal/docview/398378275/fulltext/D44DA800125F4E6APQ/58?accountid=14512	Emory Thomas Jr.	1994-02-22	No	Develop
Wall Street Journal	HIV Resistance	Merck's Elation Over AIDS Drug Sours	http://search.proquest.com/wallstreetjournal/docview/398479322/fulltext/BEC5BDD3DE544AFEPQ/229?accountid=14512	By Michael Waldholz	1994-02-25	No	Develop, Mutate
Wall Street Journal	HIV Resistance	Hybridon is given clearance to test new AIDS drug	http://search.proquest.com/wallstreetjournal/docview/398386631/fulltext/2144E16F36814C34PQ/84?accountid=14512	Knudson, Tom	1994-04-07	No	Develop, Mutate
Wall Street Journal	HIV Resistance	AIDS drug 3TC significantly prolongs AZT's effectiveness, U.S. tests confirm	http://search.proquest.com/wallstreetjournal/docview/398494159/fulltext/FF32BE099AAA4C25PQ/246?accountid=14512	Waldholz, Michael; Chipello, Christopher J	1995-02-02	No	Mutate
Wall Street Journal	HIV Resistance	Merck's Chairman, at Annual Meeting, Stresses Role of New Prescription Drugs	http://search.proquest.com/wallstreetjournal/docview/398478968/fulltext/FF32BE099AAA4C25PQ/252?accountid=14512	Elyse TaNouye	1995-04-26	No	Develop
Wall Street Journal	HIV Resistance	Unit of Roche Sets Up Lottery For AIDS Drug --- ENough for 2,280 Patients Will Be Given Out Free Under Pact With FDA	http://search.proquest.com/wallstreetjournal/docview/398439007/fulltext/2144E16F36814C34PQ/148?accountid=14512	Michael Waldholz	1995-06-21	No	Develop
Wall Street Journal	HIV Resistance	Merck joins Roche unit in offering test drug free to some AIDS patients	http://search.proquest.com/wallstreetjournal/docview/398500236/fulltext/2144E16F36814C34PQ/146?accountid=14512	Waldholz, Michael	1995-07-17	No	Develop
Wall Street Journal	HIV Resistance	Roche Unit Applies for U.S. Approval To Market a New Type of AIDS Drug	http://search.proquest.com/wallstreetjournal/docview/398467791/2144E16F36814C34PQ/174?accountid=14512	Langreth, Robert.	1995-09-05	No	Develop
Wall Street Journal	HIV Resistance	Combining AZT, Other AIDS Drugs Appears Promising	http://search.proquest.com/wallstreetjournal/docview/398481067/fulltext/2144E16F36814C34PQ/121?accountid=14512	TaNouye, Elyse	1995-09-15	No	Develop, Mutate
Wall Street Journal	HIV Resistance	An FDA panel urges approval of AIDS drug	http://search.proquest.com/wallstreetjournal/docview/398481017/fulltext/2144E16F36814C34PQ/108?accountid=14512	McGinley, Laurie; Womack, Anita	1995-11-08	No	Mutate
Wall Street Journal	HIV Resistance	Three-drug therapy may suppress HIV	http://search.proquest.com/wallstreetjournal/docview/398483076/fulltext/D44DA800125F4E6APQ/47?accountid=14512	Waldholz, Michael	1996-01-30	No	Develop
Wall Street Journal	HIV Resistance	Roche AIDS Drug Prolongs Life if Used With a Second Medicine, Study Finds	http://search.proquest.com/wallstreetjournal/docview/398491179/7DC91B666CCE445EPQ/300?accountid=14512	Waldholz, Michael. Wall Street Journal,	1996-05-07	No	Develop
Wall Street Journal	HIV Resistance	Strong Medicine: New Drug `Cocktails' Mark Exciting Turn In the War on AIDS --- Companies Race to Market With `Protease Inhibitors' After Good Test Results --- `I Feel Wonderful, Incredible'	http://search.proquest.com/wallstreetjournal/docview/398541776/fulltext/2144E16F36814C34PQ/105?accountid=14512	Waldholz, Michael	1996-06-14	No	Develop, Mutate
Wall Street Journal	HIV Resistance	Boehringer Drug, Viramune, Cleared As HIV Treatment	http://search.proquest.com/wallstreetjournal/docview/398498840/fulltext/D44DA800125F4E6APQ/55?accountid=14512	Laurie McGinley	1996-06-25	No	Develop
Wall Street Journal	HIV Resistance	Studies show even stronger AIDS drugs	http://search.proquest.com/wallstreetjournal/docview/398529540/fulltext/2144E16F36814C34PQ/109?accountid=14512	TaNouye, Elyse	1996-07-09	No	Develop
Wall Street Journal	HIV Resistance	AIDS Study Finds Drug Pairing Effective --- Early Evidence Shows Use Of Two Protease Drugs Eliminates Most HIV	http://search.proquest.com/wallstreetjournal/docview/398574291/fulltext/D44DA800125F4E6APQ/53?accountid=14512	Michael Waldholz	1996-07-11	No
Wall Street Journal	HIV Resistance	Heard on the street: BioChem shares tumble in Nasdaq carnage despite drug's critical role in AIDS cocktail	http://search.proquest.com/wallstreetjournal/docview/398496383/fulltext/FF32BE099AAA4C25PQ/241?accountid=14512	McGough, Robert; Chipello, Christopher J	1996-07-18	No	Develop, Mutate
Wall Street Journal	HIV Resistance	Persistent doctor alters AIDS therapy	http://search.proquest.com/wallstreetjournal/docview/398685105/D44DA800125F4E6APQ/69?accountid=14512	TaNouye, Elyse	1996-09-26	No	Develop
Wall Street Journal	HIV Resistance	Some AIDS cases defy new drug 'cocktails'	http://search.proquest.com/wallstreetjournal/docview/398713142/fulltext/2144E16F36814C34PQ/85?accountid=14512	Waldholz, Michael	1996-10-10	No	Develop, Mutate
Wall Street Journal	HIV Resistance	Genetic Advantage: Inside Science's Race To Learn Why Some Seem Immune to AIDS --- It's the Essential Next Step After Protease Inhibitors; The Key: Three Gateways --- Studying Mr. Kronberg's Cells	http://search.proquest.com/wallstreetjournal/docview/398580846/fulltext/D44DA800125F4E6APQ/68?accountid=14512	Michael Waldholz	1997-01-23	No	Develop, Acquire
Wall Street Journal	HIV Resistance	Agouron trial boasts safety of new AIDS drug	http://search.proquest.com/wallstreetjournal/docview/398739432/fulltext/FF32BE099AAA4C25PQ/240?accountid=14512	Rundle, Rhonda L.	1997-01-24	No	Develop
Wall Street Journal	HIV Resistance	AIDS studies back advances on drug 'cocktails'	http://search.proquest.com/wallstreetjournal/docview/398537347/fulltext/2144E16F36814C34PQ/113?accountid=14512	Waldholz, Michael	1997-01-27	No	Develop
Wall Street Journal	HIV Resistance	Glaxo, U.S. Firm Go on Research Blitz To Unravel Riddle of HIV's Resistance	http://search.proquest.com/wallstreetjournal/docview/398643438/D44DA800125F4E6APQ/3?accountid=14512	Stephen D. Moore	1997-02-07	No	Develop, Mutate
Wall Street Journal	HIV Resistance	Merck ends curbs on its distribution of popular AIDS drug	http://search.proquest.com/wallstreetjournal/docview/398607410/fulltext/7DC91B666CCE445EPQ/309?accountid=14512	N/A	1997-05-14	No	Develop
Wall Street Journal	HIV Resistance	Guidelines to clarify HIV drug muddle	http://search.proquest.com/wallstreetjournal/docview/398741244/fulltext/D44DA800125F4E6APQ/26?accountid=14512	McGinley, Laurie	1997-06-05	No	Develop
Wall Street Journal	HIV Resistance	Landmark AIDS study is finally released	http://search.proquest.com/wallstreetjournal/docview/398670483/fulltext/2144E16F36814C34PQ/110?accountid=14512	Waldholz, Michael	1997-09-11	No	Develop
Wall Street Journal	HIV Resistance	AIDS 'cocktail' has longevity, study suggests	http://search.proquest.com/wallstreetjournal/docview/398643969/fulltext/2144E16F36814C34PQ/125?accountid=14512	Waldholz, Michael	1997-09-29	No	Develop
Wall Street Journal	HIV Resistance	Medicine: New Drug Mix Would Simplify HIV Therapy	http://search.proquest.com/wallstreetjournal/docview/398884826/fulltext/D44DA800125F4E6APQ/16?accountid=14512	Michael Waldholz	1998-06-30	No	Develop
Wall Street Journal	HIV Resistance	Many Firms Pushing Search For AIDS Drugs --- Drug, Biotech Companies Working on 113 Products, Trade Group Survey Finds	http://search.proquest.com/wallstreetjournal/docview/398665053/fulltext/2144E16F36814C34PQ/86?accountid=14512	Otesa Middleton	1998-12-07	No	Develop
Wall Street Journal	HIV Resistance	FDA Approves Glaxo's 3TC As Oral Hepatitis B Drug	http://search.proquest.com/wallstreetjournal/docview/398661812/fulltext/FF32BE099AAA4C25PQ/259?accountid=14512	N/A	1998-12-10	No	Develop
Wall Street Journal	HIV Resistance	Merck to Begin Trials Of New AIDS Drug That's Easier to Take	http://search.proquest.com/wallstreetjournal/docview/398637969/fulltext/2144E16F36814C34PQ/132?accountid=14512	N/A	1999-01-11	No	Develop
Wall Street Journal	HIV Resistance	Drug-Resistant HIV Becomes More Widespread	http://search.proquest.com/wallstreetjournal/docview/398701118/fulltext/D44DA800125F4E6APQ/42?accountid=14512	Michael Waldholz	1999-02-05	No	Mutate
Wall Street Journal	HIV Resistance	New Drug From Pharmacia May Fight Resistant AIDS Strains	http://search.proquest.com/wallstreetjournal/docview/398829682/fulltext/D44DA800125F4E6APQ/61?accountid=14512	Michael Waldholz	1999-06-24	No	Develop, Mutate
Wall Street Journal	HIV Resistance	Number of AIDS Deaths Drops 20%, But Pace of Decline Slows Significantly	http://search.proquest.com/wallstreetjournal/docview/398737016/fulltext/2144E16F36814C34PQ/80?accountid=14512	Michael Waldholz	1999-08-31	No	Develop
Wall Street Journal	HIV Resistance	Gilead AIDS Drug Shows Promise Against Resistance --- In Trial Patients, TeNofovir Reduced Virus Levels, Minimized Side Effects	http://search.proquest.com/wallstreetjournal/docview/398728149/2144E16F36814C34PQ/156?accountid=14512	Ralph T. King Jr., Michael Waldholz and Thomas M. Burton	1999-09-28	No	Develop, Emerge
Wall Street Journal	HIV Resistance	MIT Scientists Find Experimental Drugs That Might Block HIV's Entry Into Cells	http://search.proquest.com/wallstreetjournal/docview/398738452/fulltext/D44DA800125F4E6APQ/36?accountid=14512	Michael Waldholz	1999-10-01	No	Develop
Wall Street Journal	HIV Resistance	U.S. Bioscience Suspends Test Of AIDS Drug	http://search.proquest.com/wallstreetjournal/docview/398672084/fulltext/2144E16F36814C34PQ/104?accountid=14512	Winslow, Ron	1999-10-15	No	Develop
Wall Street Journal	HIV Resistance	Scientists Find Compounds That May Pave Way for AIDS Drug	http://search.proquest.com/wallstreetjournal/docview/398696920/fulltext/2144E16F36814C34PQ/120?accountid=14512	Michael Waldholz	2000-01-28	No
Wall Street Journal	HIV Resistance	Halting AIDS-Drug Treatment Briefly May Help Strengthen Immune System	http://search.proquest.com/wallstreetjournal/docview/398749621/fulltext/2144E16F36814C34PQ/82?accountid=14512	Michael Waldholz	2000-02-01	No	Develop
Wall Street Journal	HIV Resistance	Drug Makers Test Easier-to-Use Therapies for AIDS	http://search.proquest.com/wallstreetjournal/docview/398690240/BEC5BDD3DE544AFEPQ/187?accountid=14512	By Michael Waldholz.	2000-02-03	No	Mutate
Wall Street Journal	HIV Resistance	Abbott Labs Is Seeking Accelerated Approval Of New AIDS Drug	http://search.proquest.com/wallstreetjournal/docview/398769966/fulltext/2144E16F36814C34PQ/130?accountid=14512	N/A	2000-06-02	No	Develop
Wall Street Journal	HIV Resistance	Best Intentions: Bristol-Myers Finds Pledging AIDS Aid Is Easier Than Giving It --- In Botswana, Many Complain Grants Are Misdirected, With Too Many Strings --- A Request for `Less Fanfare'	http://search.proquest.com/wallstreetjournal/docview/398722032/fulltext/2144E16F36814C34PQ/131?accountid=14512	Michael Waldholz	2000-07-07	No	Emerge
Wall Street Journal	HIV Resistance	Long-Term Cases Inspire Search For More Answers	http://search.proquest.com/wallstreetjournal/docview/398740866/D44DA800125F4E6APQ/67?accountid=14512	Mark Schoofs	2000-09-28	No	Mutate
Wall Street Journal	HIV Resistance	Computer Model Reveals HIV Mutations That Affect Bristol-Myers's Stavudine	http://search.proquest.com/wallstreetjournal/docview/398769002/fulltext/D44DA800125F4E6APQ/9?accountid=14512	Meera Louis	2000-10-26	No	Mutate
Wall Street Journal	HIV Resistance	Molecule Able to Block HIV's Entrance Into a Cell Is Found by an MIT Scientist	http://search.proquest.com/wallstreetjournal/docview/398764841/fulltext/D44DA800125F4E6APQ/17?accountid=14512	Antonio Regalado	2001-01-12	No	Develop, Mutate
Wall Street Journal	HIV Resistance	New Class of AIDS Drugs Yields Good Results in Some Early Tests	http://search.proquest.com/wallstreetjournal/docview/398791820/Record/D44DA800125F4E6APQ/72?accountid=14512	Gardiner Harris	2001-01-30	No	Develop
Wall Street Journal	HIV Resistance	Delay in Starting Patients on AIDS Drugs Is Proposed	http://search.proquest.com/wallstreetjournal/docview/398775899/D44DA800125F4E6APQ/71?accountid=14512	Mark Schoofs	2001-02-05	No	Develop, Emerge
Wall Street Journal	HIV Resistance	Trial Medicines Foil Resistance Of HIV Strains	http://search.proquest.com/wallstreetjournal/docview/398761523/D44DA800125F4E6APQ/1?accountid=14512	Michael Waldholz.	2001-02-06	No	Develop, Emerge, Mutate
Wall Street Journal	HIV Resistance	Studies Look at Interruption in Taking AIDS Medicines	http://search.proquest.com/wallstreetjournal/docview/398775955/D44DA800125F4E6APQ/70?accountid=14512	Mark Schoofs	2001-02-07	No	Develop
Wall Street Journal	HIV Resistance	Abbott AIDS Drug Didn't Make Patients Resistant to Others	http://search.proquest.com/wallstreetjournal/docview/398887747/fulltext/D44DA800125F4E6APQ/60?accountid=14512	N/A	2001-02-08	No	Develop, Mutate
Wall Street Journal	HIV Resistance	Belgian Firm Tests Drug Resistance Of AIDS Patients	http://search.proquest.com/wallstreetjournal/docview/398834309/fulltext/D44DA800125F4E6APQ/14?accountid=14512	Meera Louis	2001-02-08	No	Develop, Mutate
Wall Street Journal	HIV Resistance	Brazil May Flout Trade Laws to Keep AIDS Drugs Free for Patients	http://search.proquest.com/wallstreetjournal/docview/398828419/fulltext/2144E16F36814C34PQ/117?accountid=14512	Miriam Jordan	2001-02-12	No	Develop
Wall Street Journal	HIV Resistance	Merck Vows AIDS Help For Brazilians --- Firm Hopes Discounts For Two Key Drugs Will Prevent Copying	http://search.proquest.com/wallstreetjournal/docview/398734191/fulltext/FF32BE099AAA4C25PQ/251?accountid=14512	Miriam Jordan	2001-03-29	No	Develop
Wall Street Journal	HIV Resistance	Gilead Files for FDA Approval of AIDS Drug	http://search.proquest.com/wallstreetjournal/docview/398767131/fulltext/2144E16F36814C34PQ/90?accountid=14512	N/A	2001-05-02	No
Wall Street Journal	HIV Resistance	U.N. AIDS Conference Avoids the Real Issues	http://search.proquest.com/wallstreetjournal/docview/398914361/BEC5BDD3DE544AFEPQ/189?accountid=14512	Hempel, Sandra.	2001-06-28	No	Develop
Wall Street Journal	HIV Resistance	Brazil to Break Roche Patent On AIDS Drug	http://search.proquest.com/wallstreetjournal/docview/398768198/fulltext/7DC91B666CCE445EPQ/335?accountid=14512	By Miriam Jordan. Wall Street Journal	2001-08-23	No	Develop
Wall Street Journal	HIV Resistance	FDA Approves Genetic TestOn HIV's Drug Resistance	http://search.proquest.com/wallstreetjournal/docview/398781149/D44DA800125F4E6APQ/2?accountid=14512	N/A	2001-09-28	No	Mutate
Wall Street Journal	HIV Resistance	FDA Panel Supports Approval Of Gilead's New Drug for HIV	http://search.proquest.com/wallstreetjournal/docview/398861494/fulltext/D44DA800125F4E6APQ/12?accountid=14512	David P. Hamilton	2001-10-04	No	Develop, Mutate, Adapt
Wall Street Journal	HIV Resistance	New Challenges in Fighting AIDS --- Uganda Families Must Decide Whether Wife or Husband Will Get Medicine for HIV	http://search.proquest.com/wallstreetjournal/docview/398865505/fulltext/D44DA800125F4E6APQ/50?accountid=14512	Rachel Zimmerman	2001-11-30	No	Develop
Wall Street Journal	HIV Resistance	Trimeris, Roche Say New Drug May Benefit Some AIDS Patients	http://search.proquest.com/wallstreetjournal/docview/398850188/fulltext/2144E16F36814C34PQ/93?accountid=14512	Michael Waldholz	2002-02-20	No	Develop
Wall Street Journal	HIV Resistance	Thai AIDS Drug Is the Next Front In Patent Battle	http://search.proquest.com/wallstreetjournal/docview/398787812/fulltext/2144E16F36814C34PQ/139?accountid=14512	Rachel Zimmerman and Robert Frank	2002-03-29	No	Develop
Wall Street Journal	HIV Resistance	Health & Science: Bristol-Myers Says AIDS Drugs In Kenya Temporarily Ran Out	http://search.proquest.com/wallstreetjournal/docview/398978149/fulltext/2144E16F36814C34PQ/114?accountid=14512	Geoff Winestock	2002-04-11	No	Develop
Wall Street Journal	HIV Resistance	A Global Journal Report: AIDS Help, Premium Price --- New Drug Is Able to Suppress Even Super Strains of HIV, But May Prove Unaffordable	http://search.proquest.com/wallstreetjournal/docview/398869763/fulltext/D44DA800125F4E6APQ/18?accountid=14512	Vanessa Fuhrmans	2002-07-08	No	Develop, Mutate
Wall Street Journal	HIV Resistance	Health & TechNology: New AIDS Drug May Help Expand Treatable Groups	http://search.proquest.com/wallstreetjournal/docview/398802980/fulltext/2144E16F36814C34PQ/138?accountid=14512	Marilyn Chase	2002-09-30	No	Mutate
Wall Street Journal	HIV Resistance	Trials Will Test Whether AIDS Drug Can Also Prevent HIV	http://search.proquest.com/wallstreetjournal/docview/398967026/fulltext/D44DA800125F4E6APQ/49?accountid=14512	Chase, Marilyn	2003-12-04	No	Develop
Wall Street Journal	HIV Resistance	HIV-Test Makers Agree to Discounts for Poorer Nations	http://search.proquest.com/wallstreetjournal/docview/398856281/fulltext/D44DA800125F4E6APQ/19?accountid=14512	Schoofs, Mark	2004-01-14	No	Emerge
Wall Street Journal	HIV Resistance	Moving the Market -- Tracking the Numbers / Hit and Miss: Searching for Healthy Returns in Small Biotechs; Separate HIV Treatments Brought Success to Gilead, But Trimeris Faces Hurdles	http://search.proquest.com/wallstreetjournal/docview/398906088/fulltext/D44DA800125F4E6APQ/52?accountid=14512	Oster, Christopher	2004-03-09	No	Develop
Wall Street Journal	HIV Resistance	Big DoNors in Global AIDS Fight Agree to Buy Generic Medicines	http://search.proquest.com/wallstreetjournal/docview/398976333/fulltext/2144E16F36814C34PQ/141?accountid=14512	Lueck, Sarah	2004-04-06	No
Wall Street Journal	HIV Resistance	New Test Detects HIV Infection at Earlier Stage	http://search.proquest.com/wallstreetjournal/docview/398857938/fulltext/D44DA800125F4E6APQ/15?accountid=14512	Chase, Marilyn	2004-06-15	No
Wall Street Journal	HIV Resistance	New AIDS Drug Reduces Virus In Monkeys	http://search.proquest.com/wallstreetjournal/docview/398998503/fulltext/2144E16F36814C34PQ/118?accountid=14512	Efrati, Amir	2004-07-09	No	Develop
Wall Street Journal	HIV Resistance	AIDS Drug Developers Struggle To Keep Ahead of Resistant Strains	http://search.proquest.com/wallstreetjournal/docview/398958327/fulltext/D44DA800125F4E6APQ/59?accountid=14512	Chase, Marilyn	2005-02-23	No	Develop, Mutate
Wall Street Journal	HIV Resistance	Glaxo Drug Quickly Suppresses HIV in a Human Clinical Trial	http://search.proquest.com/wallstreetjournal/docview/398884093/fulltext/D44DA800125F4E6APQ/21?accountid=14512	Chase, Marilyn	2005-02-25	No	Develop
Wall Street Journal	HIV Resistance	Panel Backs Boehringer Drug As Treatment for Resistant HIV; Advisers to FDA Conclude Urgent Need for Tipranavir Outweighs Safety Concerns	http://search.proquest.com/wallstreetjournal/docview/398912519/fulltext/D44DA800125F4E6APQ/23?accountid=14512	Jennifer Corbett Dooren and Jeanne Whalen	2005-05-20	No
Wall Street Journal	HIV Resistance	Panacos Drug May Combat Resistant AIDS Strains	http://search.proquest.com/wallstreetjournal/docview/398915507/fulltext/2144E16F36814C34PQ/94?accountid=14512	Chase, Marilyn	2005-08-22	No	Develop, Mutate
Wall Street Journal	HIV Resistance	Glaxo Halts Trial of AIDS Drug Due to Liver Risks	http://search.proquest.com/wallstreetjournal/docview/398946220/fulltext/D44DA800125F4E6APQ/64?accountid=14512	Chase, Marilyn	2005-09-19	No	Develop
Wall Street Journal	HIV Resistance	Americas: Brazil Could Turn a Trade Victory Into Defeat	http://search.proquest.com/wallstreetjournal/docview/398937725/fulltext/2144E16F36814C34PQ/107?accountid=14512	O'Grady, Mary Anastasia	2005-12-16	No
Wall Street Journal	HIV Resistance	As AIDS Drugs Fail Thousands, 'Salvage' Is Key	http://search.proquest.com/wallstreetjournal/docview/399037656/BEC5BDD3DE544AFEPQ/203?accountid=14512	Chase, Marilyn	2006-05-03	No	Develop
Wall Street Journal	HIV Resistance	Emerging Drugs Show Promise Against HIV	http://search.proquest.com/wallstreetjournal/docview/399065888/fulltext/D44DA800125F4E6APQ/6?accountid=14512	Marilyn Chase and Jacob Goldstein	2007-02-28	No	Mutate
Wall Street Journal	HIV Resistance	Merck's New AIDS Drug Has Promise -- if It Isn't Too Pricey	http://search.proquest.com/wallstreetjournal/docview/399082709/fulltext/2144E16F36814C34PQ/77?accountid=14512	Rubenstein, Sarah	2007-10-11	No	Develop, Mutate
Wall Street Journal	HIV Resistance	The Next Steps to Take in Beating AIDS	http://search.proquest.com/wallstreetjournal/docview/399105233/fulltext/2144E16F36814C34PQ/79?accountid=14512	Montagnier, Luc	2008-10-21	Yes	Emerge
Wall Street Journal	HIV Resistance	U.S. News: ANother Benchmark in AIDS Fight, but Not Yet a Landmark	http://search.proquest.com/wallstreetjournal/docview/399115223/fulltext/2144E16F36814C34PQ/102?accountid=14512	Winslow, Ron	2009-09-25	No	Develop, Mutate
Wall Street Journal	HIV Resistance	Crucial Window to Beat Back HIV	http://search.proquest.com/wallstreetjournal/docview/635088343/fulltext/D44DA800125F4E6APQ/20?accountid=14512	N/A	2010-07-22	No	Mutate
Wall Street Journal	HIV Resistance	U.S. News: Crucial Window to Beat Back HIV	http://search.proquest.com/wallstreetjournal/docview/643268088/fulltext/D44DA800125F4E6APQ/5?accountid=14512	Winslow, Ron	2010-07-23	No	Mutate
Wall Street Journal	HIV Resistance	New Drug Shown To Reduce HIV Level	http://search.proquest.com/wallstreetjournal/docview/868188473/fulltext/D44DA800125F4E6APQ/10?accountid=14512	Jennifer Corbett Dooren	2011-05-24	No	Develop
Wall Street Journal	HIV Resistance	Health & Wellness: Cancer-Drug Alliances Expected to Increase	http://search.proquest.com/wallstreetjournal/docview/870425048/fulltext/FF32BE099AAA4C25PQ/248?accountid=14512	Gryta, Thomas	2011-06-07	No	Develop
Wall Street Journal	HIV Resistance	Bristol-Myers Squibb Receives Breakthrough Designation for HIV Treatment; An FDA breakthrough designation speeds the Development and review of therapies that treat extremely serious conditions	http://search.proquest.com/wallstreetjournal/docview/1697432236/fulltext/D44DA800125F4E6APQ/44?accountid=14512	Chen, Angela	2015-07-21	No
Cleveland Plain Dealer	Mosquito Insecticide Resistance	INSECTS RESIST PESTICIDES A MOSQUITO UP CLOSE	http://infoweb.newsbank.com/resources/doc/nb/news/0F803AF4A70BCD16?p=AWNB	Plain Dealer	1992-05-31	No
Cleveland Plain Dealer	Mosquito Insecticide Resistance	CWRU researchers Develop handheld malaria detector Small, inexpensive tool may have global impact	http://infoweb.newsbank.com/resources/doc/nb/news/1466DA2F6C91ED68?p=AWNB	Plain Dealer	2013-05-19	No	Develop
Dallas Morning News	Mosquito Insecticide Resistance	Malaria worsening worldwide despite efforts	http://infoweb.newsbank.com/resources/doc/nb/news/0ED3D25638ECA5F5?p=AWNB	Bob Drogin,	1992-08-01	No
Dallas Morning News	Mosquito Insecticide Resistance	3 U.N. agencies, World Bank to fight malaria - World Health Organization to spearhead research toward prevention, cure	http://infoweb.newsbank.com/resources/doc/nb/news/0ED3DB074552088B?p=AWNB	Dallas Morning News	1998-10-31	Yes
Dallas Morning News	Mosquito Insecticide Resistance	Mosquito-borne malaria stalking Africa's children - Disease on rebound, Now outranks AIDS as cause of death	http://infoweb.newsbank.com/resources/doc/nb/news/0ED3DB921133542D?p=AWNB	Daniel J. Wakin	1999-05-28	No
Dallas Morning News	Mosquito Insecticide Resistance	Death spurs W. Nile fears	http://infoweb.newsbank.com/resources/doc/nb/news/14017A7B28AFD520?p=AWNB	SHERRY JACOBSON	2012-07-17	No	Develop
Denver Post	Mosquito Insecticide Resistance	Researchers tinkering with bugs to fight disease - A CSU scientist takes the fight against West Nile to the guts of the mosquito, a tactic that has promise — and risks.	http://infoweb.newsbank.com/resources/doc/nb/news/105475FDAD392FAF?p=AWNB	Katy Human	2004-09-22	No	Develop
HoNolulu Star-Advertiser	Mosquito Insecticide Resistance	Pesticides, GMOs may be acceptable to fight dengue	http://infoweb.newsbank.com/resources/doc/nb/news/1595C51CB8CA1DD0?p=AWNB	Lee Cataluna	2015-11-25	No
Houston Chronicle	Mosquito Insecticide Resistance	Malaria treatment is costly and cumbersome	http://infoweb.newsbank.com/resources/doc/nb/news/0ED7B9BA38755A27?p=AWNB	JANE E. BRODY	1998-10-04	No	Develop
Houston Chronicle	Mosquito Insecticide Resistance	Area spraying for West Nile begins early - County official fears mosquitoes build immunity to repellents	http://infoweb.newsbank.com/resources/doc/nb/news/102BA5ED867A8D1F?p=AWNB	CAROL CHRISTIAN	2004-05-20	No
Houston Chronicle	Mosquito Insecticide Resistance	SUNDAY CONVERSATION - New chief's buzz on controlling mosquitoes	http://infoweb.newsbank.com/resources/doc/nb/news/10966EF60F53A943?p=AWNB	LEIGH HOPPER	2005-04-10	No
Houston Chronicle	Mosquito Insecticide Resistance	Mosquitoes may grow immune - Insects could Develop resistance to pesticide, an A&M agent warns	http://infoweb.newsbank.com/resources/doc/nb/news/119A7E6037BB9018?p=AWNB	CHRISTINA WRIGHT	2007-06-08	No	Develop
Houston Chronicle	Mosquito Insecticide Resistance	No need to get fancy battling mosquitoes - Experts contend the tried-and-true ways to ward off pests are still best	http://infoweb.newsbank.com/resources/doc/nb/news/11ADEFDA89D3B388?p=AWNB	CLAUDIA FELDMAN,	2007-08-06	No
Houston Chronicle	Mosquito Insecticide Resistance	Hoping, and spraying mosquitoes	http://infoweb.newsbank.com/resources/doc/nb/news/13A9D5B22AEC1920?p=AWNB	Houston Chronicle	2011-10-25	No
Los Angeles Times	Mosquito Insecticide Resistance	Mosquito Gene Cloned; The End May Be Near: [Home Edition]	http://search.proquest.com/latimes/docview/292393862/A111A1F91CEB4D0EPQ/2?accountid=14512	n.a	1986-08-24	No	Develop
Los Angeles Times	Mosquito Insecticide Resistance	UC Entomologists Do Battle With Pesky Array of Bugs	http://search.proquest.com/latimes/docview/280868547/fulltext/DCEE98877EC44A19PQ/30?accountid=14512	Warren, Jenifer	1989-11-13	No
Los Angeles Times	Mosquito Insecticide Resistance	The ATTACK of the KILLER MOSQUITOES Global Warming Could Bring a Deadly Increase in Insect-Borne Epidemics	http://search.proquest.com/latimes/docview/281506040/FCD8ED5F6CAB4CD1PQ/20?accountid=14512	Fisher, Marshall & Fisher, David E	1991-09-15	No	Develop, Emerge, Adapt
Los Angeles Times	Mosquito Insecticide Resistance	PERSPECTIVE ON THE ENVIRONMENT Unfinished Business: `Silent Spring' On the 30th anniversary of Rachel Carson's indictment of DDT, pesticides still threaten human life	http://search.proquest.com/latimes/docview/281853101/fulltext/FCD8ED5F6CAB4CD1PQ/28?accountid=14512	Hynes, H Patricia	1992-09-10	No	Develop
Los Angeles Times	Mosquito Insecticide Resistance	West Urged to Enliven Diet, Dine on Bugs	http://search.proquest.com/latimes/docview/281838973/fulltext/FCD8ED5F6CAB4CD1PQ/24?accountid=14512	Geoghegan, Ian	1992-10-18	No
Los Angeles Times	Mosquito Insecticide Resistance	Researchers Seek Elusive Vaccine to Stop Malaria's Comeback; Health: Tests show that a Colombian scientist's experimental drug may have 30% success rate. But his competitors say that isn't eNough	http://search.proquest.com/latimes/docview/293300827/FCD8ED5F6CAB4CD1PQ/22?accountid=14512	Hanley, Charles J	1996-06-02	No	Develop
Los Angeles Times	Mosquito Insecticide Resistance	THE CUTTING EDGE; Working Out the Bugs; Scientists experiment with natural strategies in seeking benign ways to protect crops.	http://search.proquest.com/latimes/docview/421450275/FFEDB8964D134548PQ/14?accountid=14512	Groves, Martha.	1998-05-04	No	Develop
Los Angeles Times	Mosquito Insecticide Resistance	Cover Story; Building a Better Mosquito; Incapable of Transmitting Disease, These Engineered Bugs Could End a Threat That Has Killed Millions of People. If Only the Real World Were the Same as a Laboratory.: [Home Edition]	http://search.proquest.com/latimes/docview/421659584/A111A1F91CEB4D0EPQ/3?accountid=14512	D'Antonio, Michael	2001-09-02	No	Develop, Adapt
Los Angeles Times	Mosquito Insecticide Resistance	Mosquitoes Losing Malarial Bite in Genetics Laboratory: [HOME EDITION]	http://search.proquest.com/latimes/docview/421881131/A111A1F91CEB4D0EPQ/5?accountid=14512	ROBERT LEE HOTZ	2002-05-23	Yes
Los Angeles Times	Mosquito Insecticide Resistance	Stubborn Killer Is Deciphered as Scientists Map Malaria DNA; Health: Breakthrough may help find effective treatments, but gains could be a decade off.: [HOME EDITION]	http://search.proquest.com/latimes/docview/421755434/FFEDB8964D134548PQ/13?accountid=14512	ROBERT LEE HOTZ	2002-10-03	Yes	Develop, Mutate
Los Angeles Times	Mosquito Insecticide Resistance	The Nation; Science File; Mosquitoes' Key to Insecticide Resistance: [HOME EDITION]	http://search.proquest.com/latimes/docview/421795939/A111A1F91CEB4D0EPQ/1?accountid=14512	n.a	2003-05-10	No	Develop, Mutate
Los Angeles Times	Mosquito Insecticide Resistance	MALARIA: THE STING OF DEATH; The Killer Bug; There are solutions, but most come down to one thing: commitment.: [HOME EDITION]	http://search.proquest.com/latimes/docview/421984114/FFEDB8964D134548PQ/11?accountid=14512	n.a	2005-06-05	No	Develop, Adapt
Los Angeles Times	Mosquito Insecticide Resistance	MALARIA: THE STING OF DEATH; An effective, but costly, cure	http://search.proquest.com/latimes/docview/422087656/FCD8ED5F6CAB4CD1PQ/17?accountid=14512	N/A	2005-08-15	No	Develop
Los Angeles Times	Mosquito Insecticide Resistance	The World; Experts at Malaria Conference Say Progress Is Tempered by Setbacks; At Cameroon gathering, a new vaccine buoys researchers. But rising resistance to other drugs and the sale of bogus medicines are troubling.: [HOME EDITION]	http://search.proquest.com/latimes/docview/422013980/FFEDB8964D134548PQ/9?accountid=14512	Dixon, Robyn	2005-11-18	No
Los Angeles Times	Mosquito Insecticide Resistance	Stinky feet may lead to better malaria prevention	http://search.proquest.com/latimes/docview/1430673867/fulltext/FCD8ED5F6CAB4CD1PQ/25?accountid=14512	Cheng, Maria	2013-09-08	No	Develop
Miami Herald	Mosquito Insecticide Resistance	RESEARCHERS AIM BIOLOGICAL WEAPONS AT PESKY MOSQUITOES	http://infoweb.newsbank.com/resources/doc/nb/news/0EB4D449C8E89AEE?p=AWNB	BILL KACZOR	1996-07-07	No
Miami Herald	Mosquito Insecticide Resistance	POSSIBLE KEY TO MOSQUITOES' IMMUNITY IS FOUND	http://infoweb.newsbank.com/resources/doc/nb/news/0FB02CD9DDFC86B2?p=AWNB	RICK CALLAHAN	2003-05-12	No	Mutate
Miami Herald	Mosquito Insecticide Resistance	HEALTH: Mexico fights resurgent dengue fever - Dengue fever is on the rise in Mexico and elsewhere in the Americas.	http://infoweb.newsbank.com/resources/doc/nb/news/1290BF2FDEC23CB0?p=AWNB	MARY CUDDEHE	2009-06-25	No	Develop
Miami Herald	Mosquito Insecticide Resistance	South Miami votes to block county over mosquito spraying in its city	http://infoweb.newsbank.com/resources/doc/nb/news/14F3EE7CF558D088?p=AWNB	ALEX BUTLER	2014-07-22	No
Miami Herald	Mosquito Insecticide Resistance	Beating the bugs: marauding mosquitos	http://infoweb.newsbank.com/resources/doc/nb/news/14FE260F7B63E350?p=AWNB	Kenneth Setzer	2014-08-23	Yes	Adapt
Minneapolis Star-Tribune	Mosquito Insecticide Resistance	New bug misting systems are all the buzz - The latest weapon against mosquitoes is raising some concerns about health and the environment in Minnesota.	http://infoweb.newsbank.com/resources/doc/nb/news/112FA961F1F6B9C8?p=AWNB	Lora Pabst	2006-07-19	No	Develop
New York Times	Mosquito Insecticide Resistance	Practical Traveler; HEALTH PROTECTION ON FOREIGN TRIPS	http://search.proquest.com/nytimes/docview/424174284/fulltext/8A3FBA0010C54ACFPQ/60?accountid=14512	Grimes, Paul.	1981-08-09	No
New York Times	Mosquito Insecticide Resistance	IN WAR AGAINST MOSQUITO, MAN IS LOSING GROUND	http://search.proquest.com/nytimes/docview/425122357/8A3FBA0010C54ACFPQ/1?accountid=14512	Broad, William J. New York Times	1984-07-24	Yes	Develop
New York Times	Mosquito Insecticide Resistance	India Tests Alternatives In Bid to Control Malaria	http://search.proquest.com/nytimes/docview/426748670/fulltext/8A3FBA0010C54ACFPQ/18?accountid=14512	SANJOY HAZARIKA, Special to the New York Times. New York Times	1988-02-09	No	Develop
New York Times	Mosquito Insecticide Resistance	Scientists Report Advances In Vaccine Against Malaria	http://search.proquest.com/nytimes/docview/426766839/fulltext/8A3FBA0010C54ACFPQ/58?accountid=14512	Sullivan, Walter	1988-03-10	No
New York Times	Mosquito Insecticide Resistance	Japanese Live Longer, the U.N. Finds	http://search.proquest.com/nytimes/docview/428454971/fulltext/8A3FBA0010C54ACFPQ/63?accountid=14512	LEWIS,, PAUL.	1992-04-26	No	Develop
New York Times	Mosquito Insecticide Resistance	Power of Natural Pest-Killer Wanes From Overuse	http://search.proquest.com/nytimes/docview/428808207/fulltext/8A3FBA0010C54ACFPQ/48?accountid=14512	Stevens, William K.	1992-12-29	No	Emerge, Develop
New York Times	Mosquito Insecticide Resistance	Warding Off Malaria: First of two articles about how to stay healthy while traveling.	http://search.proquest.com/nytimes/docview/430762595/fulltext/8A3FBA0010C54ACFPQ/47?accountid=14512	Wade, Betsy.	1997-04-20	No
New York Times	Mosquito Insecticide Resistance	A Mosquito Bites Back	http://search.proquest.com/nytimes/docview/215508211/fulltext/8A3FBA0010C54ACFPQ/5?accountid=14512	Taubes, Gary. New York Times Magazine	1997-08-24	No	Develop
New York Times	Mosquito Insecticide Resistance	U.N. and World Bank Unite To Wage War on Malaria	http://search.proquest.com/nytimes/docview/431049701/fulltext/8A3FBA0010C54ACFPQ/22?accountid=14512	Crossette, Barbara	1998-10-31	Yes
New York Times	Mosquito Insecticide Resistance	DDT, Target of Global Ban, Finds Defenders in Experts on Malaria	http://search.proquest.com/nytimes/docview/431218892/fulltext/8A3FBA0010C54ACFPQ/50?accountid=14512	Sheryl Gay Stolberg.	1999-08-29	No	Develop
New York Times	Mosquito Insecticide Resistance	Malaria: World Health Organization Says Deaths Have Dropped 25 Percent in Last Decade	http://search.proquest.com/nytimes/docview/912699739/fulltext/8A3FBA0010C54ACFPQ/28?accountid=14512	McNEIL, DONALD G, Jr. New York Times	2011-12-27	No
Newark Star-Ledger	Mosquito Insecticide Resistance	THE 'SWAT' TEAM	http://infoweb.newsbank.com/resources/doc/nb/news/1224CB05B597A290?p=AWNB	ALLISON FREEMAN	1995-05-13	No
Newark Star-Ledger	Mosquito Insecticide Resistance	Thanks to science, mosquitoes die of natural causes sooner (kind of)	http://infoweb.newsbank.com/resources/doc/nb/news/12579AD48FBAE2D0?p=AWNB	LAURAN NEERGAARD, ASSOCIATED PRESS	2009-01-02	No
Philadelphia Inquirer	Mosquito Insecticide Resistance	URBAN NIGERIA FACES YELLOW FEVER EPIDEMIC	http://infoweb.newsbank.com/resources/doc/nb/news/0EB29CC0B1B2C29B?p=AWNB	Tony Czuczka, Associated Press	1987-05-28	No	Develop
Riverside Co. Press-Enterprise	Mosquito Insecticide Resistance	Taking the bite out of killer malaria - UC Riverside scientists believe they have found a clue to an improved treatment for the disease that kills millions annually.	http://infoweb.newsbank.com/resources/doc/nb/news/0EAF843C59400CCD?p=AWNB	George Rooney, The Press-Enterprise	1993-05-15	No	Develop
Riverside Co. Press-Enterprise	Mosquito Insecticide Resistance	George P. Georghiou, entomologist, dies: As a UCR professor, his research improved control of disease-carrying insects.	http://infoweb.newsbank.com/resources/doc/nb/news/0EB0452D84764827?p=AWNB	Gail Wesson	2000-11-08	No	Develop
Salt Lake City Deseret News	Mosquito Insecticide Resistance	Insects: The good, the bad and the ugly	http://infoweb.newsbank.com/resources/doc/nb/news/0F369CF6A5427EF9?p=AWNB	Larry A. Sagers	2001-07-01	No
Salt Lake City Deseret News	Mosquito Insecticide Resistance	Scientists go after public enemy No. 1: the mosquito	http://infoweb.newsbank.com/resources/doc/nb/news/0F5807A8A2FE8D48?p=AWNB	Seth Borenstein	2002-08-18	No	Develop
Salt Lake City Deseret News	Mosquito Insecticide Resistance	Scientists find way to shorten mosquito lives	http://infoweb.newsbank.com/resources/doc/nb/news/125783097B0763A0?p=AWNB	Lauran Neergaard, Associated Press	2009-01-02	No
Salt Lake City Deseret News	Mosquito Insecticide Resistance	We should care about efforts to eliminate malaria	http://infoweb.newsbank.com/resources/doc/nb/news/14E3707703E76B90?p=AWNB	N/A	2014-05-27	No
San Francisco Chronicle	Mosquito Insecticide Resistance	BAY AREA - Knighted doctor forms global group to wipe out malaria	http://infoweb.newsbank.com/resources/doc/nb/news/11D49C38B559A760?p=AWNB	Sabin Russell	2007-12-02	No
St. Paul Pioneer Press	Mosquito Insecticide Resistance	MOSQUITOES ALWAYS BITE BACK//AMERICA HAS FOUGHT OFF MOSQUITO-BORNE MALARIA, DENGUE AND YELLOW FEVER, AND NoW IS BATTLING WEST NILE VIRUS. BUT MOSQUITOES ARE DEADLY OPPONENTS, AND THEY SEEM UNCONQUERABLE.	http://infoweb.newsbank.com/resources/doc/nb/news/0F5BC8186B8032CE?p=AWNB	SETH BORENSTEIN	2002-08-25	No	Develop
Wall Street Journal	Mosquito Insecticide Resistance	Pesky Pesticide: Resurgent Use of DDT In World's Malaria War Is Worrying Ecologists --- Alternatives Are Too Costly, Poorer Nations Discover; Problem of Mothers' Milk --- Rise of Tougher Mosquitoes	http://search.proquest.com/wallstreetjournal/docview/397999170/2028377B448B43B7PQ/3?accountid=14512	Everett G. Martin	1985-05-17	No
Wall Street Journal	Mosquito Insecticide Resistance	Environment: W. R. Grace Going 'Natural' with Bug Killer	http://search.proquest.com/wallstreetjournal/docview/398245229/fulltext/D43141DB44054491PQ/13?accountid=14512	Frank Edward Allan	1991-10-30	No	Develop
Wall Street Journal	Mosquito Insecticide Resistance	Choice of Evils: As a Tropical Scourge Makes a Comeback, So, Too, Does DDT --- In Malaria War, South Africa Turns to Pariah Pesticide Long Banned in the West --- Mozambique's Porous Border	http://search.proquest.com/wallstreetjournal/docview/398794026/fulltext/D43141DB44054491PQ/18?accountid=14512	Roger Thurow	2001-07-26	Yes
Wall Street Journal	Mosquito Insecticide Resistance	Give Us DDT	http://search.proquest.com/wallstreetjournal/docview/398993457/fulltext/D43141DB44054491PQ/24?accountid=14512	Sam Zaramba	2007-06-12	No	Develop
Wall Street Journal	Mosquito Insecticide Resistance	A Head Scratcher: How To Get Rid of a Pesky Parasite	http://search.proquest.com/wallstreetjournal/docview/399022400/fulltext/9E1BBD40050B427EPQ/10?accountid=14512	Joseph De Avila	2007-07-17	No	Develop
Wall Street Journal	Mosquito Insecticide Resistance	The Uses of DDT	http://search.proquest.com/wallstreetjournal/docview/399105989/fulltext/D43141DB44054491PQ/17?accountid=14512	NA	2007-08-16	No
Wall Street Journal	Mosquito Insecticide Resistance	Scourge of Humankind; High-profile efforts to fight malaria confront an ever-changing enemy that has evolved alongside man	http://search.proquest.com/wallstreetjournal/docview/807445839/fulltext/D43141DB44054491PQ/22?accountid=14512	NA	2010-11-19	No
Chicago Sun-Times	Tumor Resistance	Drug Therapy Changed	http://infoweb.newsbank.com/resources/doc/nb/news/0EB4224636C9FE55?p=AWNB	Howard Wolinsky	1995-09-24	No	Develop
Chicago Sun-Times	Tumor Resistance	Cancer Drug Looking Better - Reduces Mouse Tumors 64% With Radiation	http://infoweb.newsbank.com/resources/doc/nb/news/0EB423AB61DF64EA?p=AWNB	Jim Ritter	1998-07-16	No	Mutate, Develop
Chicago Sun-Times	Tumor Resistance	New Methods Boost Fight Against Cancer	http://infoweb.newsbank.com/resources/doc/nb/news/0EB4248B23782E81?p=AWNB	Jim Ritter	2000-07-23	No	Develop
Chicago Sun-Times	Tumor Resistance	Megan's Long Road	http://infoweb.newsbank.com/resources/doc/nb/news/0ED6128B18CEFA2F?p=AWNB	Jim Ritter	2001-06-24	No	Develop
Chicago Sun-Times	Tumor Resistance	Wartime Research Fuels Fight on Cancer	http://infoweb.newsbank.com/resources/doc/nb/news/0ED6128D161155D8?p=AWNB	Not available	2001-06-24	No	Develop
Cleveland Plain Dealer	Tumor Resistance	THERAPISTS PLAN NEW TRICK AGAINST CANCER	http://infoweb.newsbank.com/resources/doc/nb/news/0F803AC4774BC338?p=AWNB	AP	1992-05-21	No	Develop
Cleveland Plain Dealer	Tumor Resistance	CANCER TREATMENTS HAUNTING SOME SURVIVORS	http://infoweb.newsbank.com/resources/doc/nb/news/0F80868F5292D2DF?p=AWNB	Bor, Jonathan	1995-10-24	No
Cleveland Plain Dealer	Tumor Resistance	STUDY TRACKS FLAW IN BREAST CANCER DRUG	http://infoweb.newsbank.com/resources/doc/nb/news/0F80D592171A9EF6?p=AWNB	Recer, Paul	1999-07-30	No
Cleveland Plain Dealer	Tumor Resistance	Treatment for skin cancer shows promise in early tests	http://infoweb.newsbank.com/resources/doc/nb/news/0F2D76991FD25ABB?p=AWNB	Lou, Linda	2001-08-06	No
Cleveland Plain Dealer	Tumor Resistance	New treatment approach fights deadly lung cancer UH practice pays off for Stark County man	http://infoweb.newsbank.com/resources/doc/nb/news/10B96D9B32EFCB80?p=AWNB	McEnery, Regina	2005-07-25	No	Develop
Cleveland Plain Dealer	Tumor Resistance	Big results in study to treat cancer Modified gene helps offset chemo	http://infoweb.newsbank.com/resources/doc/nb/news/10E0010C913F38E0?p=AWNB	McEnery, Regina	2005-11-19	No	Develop
Cleveland Plain Dealer	Tumor Resistance	New kidney cancer drug offers hope	http://infoweb.newsbank.com/resources/doc/nb/news/12771580CCB27530?p=AWNB	Townsend, Angela	2009-04-07	No
Cleveland Plain Dealer	Tumor Resistance	2 studies reveal new findings on breast cancer risk Inquiries looked at cholesterol, genes	http://infoweb.newsbank.com/resources/doc/nb/news/14A66B4A38F0EB68?p=AWNB	Townsend, Angela	2013-11-30	No	Develop
Dallas Morning News	Tumor Resistance	Caffeine, cancer studies explore how cells repair damaged DNA	http://infoweb.newsbank.com/resources/doc/nb/news/0ED3D1059ED034E3?p=AWNB	Siegfried, Tom	1990-05-28	No	Develop
Dallas Morning News	Tumor Resistance	SCIENCE VS. CANCER	http://infoweb.newsbank.com/resources/doc/nb/news/0ED3D110130EE6B2?p=AWNB	Rubin, Rita	1990-07-02	No	Develop
Dallas Morning News	Tumor Resistance	Contrary concepts offer clues to some of life's complications	http://infoweb.newsbank.com/resources/doc/nb/news/0ED3D4F1DCDC6EE0?p=AWNB	Siegfried, Tom	1994-09-19	No
Dallas Morning News	Tumor Resistance	Researchers closely watch experimental cancer therapy Treatment would keep blood from reaching tumors	http://infoweb.newsbank.com/resources/doc/nb/news/0ED3DA9421E4EED9?p=AWNB	Cooke, Robert	1998-02-22	No	Develop
Dallas Morning News	Tumor Resistance	Experimental pill helps patients after leukemia treatments fail	http://infoweb.newsbank.com/resources/doc/nb/news/0ED3DBEC5F11047A?p=AWNB	AP	1999-12-04	No	Develop
Dallas Morning News	Tumor Resistance	Optimism surrounds new cancer drug Gleevec's long-term effects still unkNown	http://infoweb.newsbank.com/resources/doc/nb/news/0ED81EC17ABB71F5?p=AWNB	Altman, Lawrence K.	2001-05-28	No	Develop
Dallas Morning News	Tumor Resistance	Drug may make new cancers harder to fight - But powerful tamoxifen reduces risk of breast tumors recurring	http://infoweb.newsbank.com/resources/doc/nb/news/0EDB047DA4F69F19?p=AWNB	Recer, Paul	2001-07-04	No	Develop
Dallas Morning News	Tumor Resistance	Tricking cancer cells into dying - Dallas researchers create promising drug, hope to expand tests	http://infoweb.newsbank.com/resources/doc/nb/news/104E39350DC4B0AC?p=AWNB	Ambrose, Sue Goetinck	2004-09-03	No
Dallas Morning News	Tumor Resistance	Studies may advance lung cancer therapy - Dallas research could help tailor regimens for smokers, Nonsmokers	http://infoweb.newsbank.com/resources/doc/nb/news/1089C4F341EF2FFE?p=AWNB	Ambrose, Sue Goetinck	2005-03-02	No	Develop, Mutate
Dallas Morning News	Tumor Resistance	Varying care by tumor type - UT Southwestern study targets tailored lung cancer treatments	http://infoweb.newsbank.com/resources/doc/nb/news/118D434E47A80D70?p=AWNB	Ambrose, Sue Goetinck	2007-04-29	No	Develop
Denver Post	Tumor Resistance	Miracle cancer cure isn't here yet Media help fuel hopes for answers slow in coming	http://infoweb.newsbank.com/resources/doc/nb/news/0EAF44E72CD0ECB2?p=AWNB	Marlene Cimons, Joshn Getlin, and Thomas H Maugh	1998-07-30	No	Develop
Denver Post	Tumor Resistance	Targeted cancer drug stirs guarded optimism Progress limited so far to relatively rare ailment	http://infoweb.newsbank.com/resources/doc/nb/news/0EC50F110C936961?p=AWNB	Lawrence K Altman	2001-05-27	No	Develop, Mutate
Denver Post	Tumor Resistance	Diluted-drug scare growing in Kansas City	http://infoweb.newsbank.com/resources/doc/nb/news/0EDF606A621A124A?p=AWNB	The Associated Press	2001-08-17	No	Develop
Denver Post	Tumor Resistance	Boulder biotech firm in danger of delisting-Tapestry's stock failed...	http://infoweb.newsbank.com/resources/doc/nb/news/108A45B8B278A250?p=AWNB	Kimberly S. Johnson	2005-03-04	No
HoNolulu Star-Advertiser	Tumor Resistance	Obese cancer patients often shorted on chemo doses	http://infoweb.newsbank.com/resources/doc/nb/news/148F5E028D9BEAD0?p=AWNB	Marilynn Marchione	2013-09-19	No	Develop
Houston Chronicle	Tumor Resistance	Theories may explain why cancer cells resist chemotherapy	http://infoweb.newsbank.com/resources/doc/nb/news/0ED7ACAE9D8BDFD3?p=AWNB	Susan Okie	1986-12-01	No	Develop
Houston Chronicle	Tumor Resistance	Study: Tamoxifen eventually backfires - Breast-cancer fighter could boost disease	http://infoweb.newsbank.com/resources/doc/nb/news/0ED7BA97B4B4EF2C?p=AWNB		1999-07-30	No
Houston Chronicle	Tumor Resistance	Experimental drug could become treatment for leukemia	http://infoweb.newsbank.com/resources/doc/nb/news/0ED7BAEB1B6ED90D?p=AWNB	Leigh Hopper	1999-12-04	No	Develop
Houston Chronicle	Tumor Resistance	Surprising new pill touted as `holy grail' of leukemia research	http://infoweb.newsbank.com/resources/doc/nb/news/0EB4889EE0BD390C?p=AWNB	Leigh Hopper	2000-12-03	No	Develop
Houston Chronicle	Tumor Resistance	Breast cancer drug approved Baylor doctor's test targets those unresponsive to treatment	http://infoweb.newsbank.com/resources/doc/nb/news/0F32BBF047A4E52C?p=AWNB	Todd Ackerman	2002-04-26	No	Develop
Houston Chronicle	Tumor Resistance	Gene test can predict an effective chemo course	http://infoweb.newsbank.com/resources/doc/nb/news/0FB74D596E903D84?p=AWNB	Todd Ackerman	2003-06-03	No	Acquire
Houston Chronicle	Tumor Resistance	Dream team targets cancer switch M.D. Anderson joins two other institutions in research effort	http://infoweb.newsbank.com/resources/doc/nb/news/12877789D3D09DD8?p=AWNB	Todd Ackerman	2009-05-27	No
Houston Chronicle	Tumor Resistance	Breast cancer study praises drug combo effectiveness - Results hailed for treatment of advanced cases	http://infoweb.newsbank.com/resources/doc/nb/news/13B85C8BACB71CF0?p=AWNB	Don Finley	2011-12-08	No
Houston Chronicle	Tumor Resistance	Blood test could replace cancer biopsy	http://infoweb.newsbank.com/resources/doc/nb/news/154D66C335712AE8?p=AWNB	Gina Kolata	2015-04-20	No	Develop, Emerge
Los Angeles Investors Business Daily	Tumor Resistance	Clovis Off 70% As Cancer Drug Falls Behind	http://www.lexisnexis.com/lnacui2api/api/version1/getDocCui?lni=5HD3-4031-JCBB-K47N&csi=270944,270077,11059,8411&hl=t&hv=t&hnsd=f&hns=t&hgn=t&oc=00240&perma=true	Reeves, Amy	2015-11-17	No	Mutate
Los Angeles Times	Tumor Resistance	Diet and Cancer	http://search.proquest.com/latimes/docview/292142628/F5A7BB8703E641BFPQ/20?accountid=14512	Not available	1985-08-04	No
Los Angeles Times	Tumor Resistance	Combined Drugs Found to Ease Side Effects in Cancer Patients	http://search.proquest.com/latimes/docview/292153659/F5A7BB8703E641BFPQ/22?accountid=14512	Not available	1985-09-15	No
Los Angeles Times	Tumor Resistance	`Reading' Cancer Cells City of Hope Researcher's Work Detects Patient's Drug Resistance	http://search.proquest.com/latimes/docview/292858422/F5A7BB8703E641BFPQ/1?accountid=14512	Ricks, Delthia	1988-07-17	No	Develop
Los Angeles Times	Tumor Resistance	Experimental Drug Targets Colon Cancer	http://search.proquest.com/latimes/docview/1251185147/fulltextPDF/F5A7BB8703E641BFPQ/9?accountid=14512	Maugh, Thomas H.	1989-11-27	No	Develop
Los Angeles Times	Tumor Resistance	SCIENCE / MEDICINE Breast Cancer Survival Rate May Double, Study Finds Treatment: A combination of bone marrow transplants and high doses of drugs is credited for 58% of patients being free of the disease after one year.	http://search.proquest.com/latimes/docview/281046489/F5A7BB8703E641BFPQ/33?accountid=14512	Maugh, Thomas H.	1990-05-14	No	Develop
Los Angeles Times	Tumor Resistance	Mice, Men Join Forces in Cancer Fight	http://search.proquest.com/latimes/docview/281110891/F5A7BB8703E641BFPQ/19?accountid=14512	Kurtenback, Elaine	1990-07-29	No	Develop
Los Angeles Times	Tumor Resistance	Insurer Agrees to Fund Breast Cancer Research Health: Blue Cross-Blue Shield was sued for Not covering treatment, whose testers include Scripps Clinic.	http://search.proquest.com/latimes/docview/281646283/F5A7BB8703E641BFPQ/36?accountid=14512	Zamichow, Nora	1991-12-18	No	Develop
Los Angeles Times	Tumor Resistance	MEDICINE / BREAST CANCER Nationwide Study to Test Bone Marrow Treatment	http://search.proquest.com/latimes/docview/281689624/F5A7BB8703E641BFPQ/31?accountid=14512	Zamichow, Nora	1991-12-19	No	Develop
Los Angeles Times	Tumor Resistance	Patients' Chances of Recovery Linked to Cancer Type Health: Some cancers respond better to treatment than others. Doctors are learning that the form the disease takes has a lot to do with it.	http://search.proquest.com/latimes/docview/281715917/FB915CE7A9394E3DPQ/41?accountid=14512	Brown, David	1992-06-11	Yes	Mutate, Adapt
Los Angeles Times	Tumor Resistance	A Whole Pharma-Sea Out There? Research: Two San Diego scientists plumb the depths for inspiration in Developing drugs for human ills.	http://search.proquest.com/latimes/docview/281809621/AD08B5353D3F48B3PQ/115?accountid=14512	Zamichow, Nora	1992-10-25	No	Develop
Los Angeles Times	Tumor Resistance	Novel Therapy Offers 'Glimmer of Hope'; Medicine: Girl's turnaround from cancer is attributed to use of experimental drug BSO.	http://search.proquest.com/latimes/docview/421365883/66AD9683FA3E46FFPQ/37?accountid=14512	Monmaney, Terence	1997-11-15	No
Los Angeles Times	Tumor Resistance	Cancer Drugs Face Long Road From Mice to Men; Medicine: Doctors downplay excitement over report. Questions raised about how media handle such advances.	http://search.proquest.com/latimes/docview/421445670/F5A7BB8703E641BFPQ/26?accountid=14512	Cimons, Marlene; Getline, Josh; Maugh, Thomas H.	1998-05-06	No	Develop
Los Angeles Times	Tumor Resistance	An exploration of issues and trends affecting science, medicine and the environment; The Hunt for Better Cancer Fighters; Scientists looking for a more effective and less toxic drug than Taxol believe they have found one. But the substance is scarce, so drug companies are racing to find a way of making it in quantity.	http://search.proquest.com/latimes/docview/421701991/F5A7BB8703E641BFPQ/4?accountid=14512	Powell, Kendall S.	2000-07-20	No	Develop
Los Angeles Times	Tumor Resistance	THE NATION; Study Finds Danger With Cancer Drug	http://search.proquest.com/latimes/docview/421646763/F5A7BB8703E641BFPQ/16?accountid=14512	Not available	2001-07-04	No	Develop
Los Angeles Times	Tumor Resistance	MEDICINE; Pressing ahead to battle tumors; Spotty trials deflated hype over angiogenesis as a way to stop cancer's growth. But scientists say it's early yet.	http://search.proquest.com/latimes/docview/421771134/66AD9683FA3E46FFPQ/15?accountid=14512	Mestel, Rosie	2002-12-23	No	Mutate
Los Angeles Times	Tumor Resistance	A cycle of hope, heartbreak; New cancer therapies do extend lives, but the drugs' effectiveness may only be temporary.	http://search.proquest.com/latimes/docview/422000542/AC9FB59E6C9B46A5PQ/3?accountid=14512	Foreman, Judt	2003-08-18	No	Mutate
Los Angeles Times	Tumor Resistance	Medicine; New drugs may rival tamoxifen	http://search.proquest.com/latimes/docview/421875284/AD08B5353D3F48B3PQ/124?accountid=14512	Allen, Jane E.	2004-03-22	No	Develop
Los Angeles Times	Tumor Resistance	Pfizer Sees Hope in Drug to Treat Two Cancers; The company finds that the once-daily pill shows promise on a rare digestive-tract disease and kidney cancer.	http://search.proquest.com/latimes/docview/422110647/F5A7BB8703E641BFPQ/29?accountid=14512	Gellene, Denise	2005-05-16	No	Develop
Los Angeles Times	Tumor Resistance	COLUMN ONE; Neptune's Medicine Chest; To Scripps researcher Bill Fenical, the oceans are a tantalizing trove of potential anti- cancer drugs. It's all about the chemistry, he says.	http://search.proquest.com/latimes/docview/422099080/F5A7BB8703E641BFPQ/30?accountid=14512	Balzar, John	2006-05-18	No	Develop
Los Angeles Times	Tumor Resistance	Girls track breast cancer puzzle; Arcadia cousins' 'impressive' science research looks at why some cases are drug-resistant. They will present it in New York.	http://search.proquest.com/latimes/docview/422195808/F5A7BB8703E641BFPQ/15?accountid=14512	Perdomo, Daniela	2007-11-25	No	Develop
Los Angeles Times	Tumor Resistance	MEDICINE; IN THE WORKS; Using heat to fry cancer	http://search.proquest.com/latimes/docview/762660427/F5A7BB8703E641BFPQ/6?accountid=14512	Dance, Amber	2010-11-08	No	Develop
Los Angeles Times	Tumor Resistance	Drug combos could slow breast cancer, studies say	http://search.proquest.com/latimes/docview/909198182/F5A7BB8703E641BFPQ/28?accountid=14512	Roan, Shari	2011-12-08	No	Develop, Mutate
Miami Herald	Tumor Resistance	Gene Therapy May Allow More Chemotherapy	http://infoweb.newsbank.com/resources/doc/nb/news/0EB346A070CBDC59?p=AWNB	ASSOCIATED PRESS	1992-05-21	No
Miami Herald	Tumor Resistance	Leukemia Drug Promising Scientists 'Exited' About Early TTest Results in 31 Cancer Patients	http://infoweb.newsbank.com/resources/doc/nb/news/0EB5D453F4E9AC4D?p=AWNB	Janet McConnaughey	1999-12-04	No	Develop
Miami Herald	Tumor Resistance	New Hope From Old Poison UM Researhers Are Using Arsenic to Treat Deadly Blood Cancer That Defies Chemo	http://infoweb.newsbank.com/resources/doc/nb/news/0EB72ED91CBB2699?p=AWNB	Christine Morris	2000-10-05	No
Miami Herald	Tumor Resistance	Cancer Drug Has a Mix of Effects Study: But Tamoxifen Saves Lives	http://infoweb.newsbank.com/resources/doc/nb/news/0ED3590481BCFD5F?p=AWNB	Paul Recer	2001-07-04	No	Develop
Miami Herald	Tumor Resistance	Doctors Fear Hazards in Diluted-Drugs Case	http://infoweb.newsbank.com/resources/doc/nb/news/0EDF8B656FEBB26C?p=AWNB	Dana Fields	2001-08-17	No	Develop
Miami Herald	Tumor Resistance	New Ways to Attack Cancer on the Horizon	http://infoweb.newsbank.com/resources/doc/nb/news/0EF89B87C502F5AF?p=AWNB	Stephen Smith	2001-11-01	No	Develop
Miami Herald	Tumor Resistance	Searching the Sea	http://infoweb.newsbank.com/resources/doc/nb/news/102F658395F3AAA8?p=AWNB	Sarah Lesher	2004-05-28	No	Develop
Miami Herald	Tumor Resistance	New Drug Effective Against Intestinal Cancer	http://infoweb.newsbank.com/resources/doc/nb/news/10DC1DE07A381168?p=AWNB	Emma Ross	2005-11-04	No	Develop
Miami Herald	Tumor Resistance	University of Miami Medical School: Breast Cancer Lab Ready For Research	http://infoweb.newsbank.com/resources/doc/nb/news/1339323865D99728?p=AWNB	Fred Tasker	2010-11-18	No	Develop
Miami Herald	Tumor Resistance	Florida Cancer Patient Turns Into the World's Most Inspiring Cover Girl	http://infoweb.newsbank.com/resources/doc/nb/news/142160F6D33F94F0?p=AWNB	Andrea Torres	2012-10-22	No	Develop
Minneapolis Star-Tribune	Tumor Resistance	Taxol may extend survival in advanced ovarian cancer cases - Study suggests use of drug early in patient's treatment	http://infoweb.newsbank.com/resources/doc/nb/news/0EFD642A73438C17?p=AWNB	Slovut, Gordon	1996-01-04	No	Develop
Minneapolis Star-Tribune	Tumor Resistance	`U' doctor reports giant step forward in conquering childhood T- cell leukemia	http://infoweb.newsbank.com/resources/doc/nb/news/0EFD65B48770248F?p=AWNB	Slovut, Gordon	1996-12-07	Yes	Develop
Minneapolis Star-Tribune	Tumor Resistance	The Observatory - Signs of hope in war on cancer // The reports from Judah Folkman's lab and case studies are electrifying the medical community.	http://infoweb.newsbank.com/resources/doc/nb/news/0EFD63AD4917F9AC?p=AWNB	Dawson, Jim	1998-09-23	No
Minneapolis Star-Tribune	Tumor Resistance	TARGETING CANCER CELLS - A small Washington County company is working toward what could be a breakthrough: a drug that kills only cancer cells.	http://infoweb.newsbank.com/resources/doc/nb/news/1295349BC93423E0?p=AWNB	Lee, Thomas	2009-07-06	No	Develop, Mutate
New York Daily News	Tumor Resistance	VITAL SIGNS	http://www.lexisnexis.com/lnacui2api/api/version1/getDocCui?lni=3SCH-JP60-0093-D0P6&csi=151550&hl=t&hv=t&hnsd=f&hns=t&hgn=t&oc=00240&perma=true	Colette Bouchez	1995-07-31	No	Develop
New York Daily News	Tumor Resistance	PATIENTS PRESS FOR DRUGS NEW THERAPY KILLED TUMORS IN MICE; HUMAN TESTS NEXT	http://www.lexisnexis.com/lnacui2api/api/version1/getDocCui?lni=3SMC-5RT0-0093-D3JD&csi=151550&hl=t&hv=t&hnsd=f&hns=t&hgn=t&oc=00240&perma=true	Sheila Anne Feeney	1998-05-05	No	Develop, Mutate
New York Daily News	Tumor Resistance	UNDERSTANDING HOW CANCER WORKS	http://www.lexisnexis.com/lnacui2api/api/version1/getDocCui?lni=3X38-KJ80-0093-D2T0&csi=151550&hl=t&hv=t&hnsd=f&hns=t&hgn=t&oc=00240&perma=true	Amanda Gardner	1999-08-02	No	Develop
New York Daily News	Tumor Resistance	BULL'S-EYE! The early success of targeted therapies offers new hope to patients with deadly cancers	http://www.lexisnexis.com/lnacui2api/api/version1/getDocCui?lni=4CMP-XHB0-TWCR-421D&csi=151550&hl=t&hv=t&hnsd=f&hns=t&hgn=t&oc=00240&perma=true	Jordan Lite	2004-06-16	No	Develop
New York Times	Tumor Resistance	Putting Interferon to the Test	http://search.proquest.com/nytimes/docview/424082284/fulltext/C061587382144BDAPQ/53?accountid=14512	Michael Edelhart	1981-04-26	No	Develop
New York Times	Tumor Resistance	Chemotherapy Moves to Fore As A Cure for Cancer	http://search.proquest.com/nytimes/docview/425072063/fulltext/C061587382144BDAPQ/15?accountid=14512	Jane E. Brody	1984-05-10	No	Develop
New York Times	Tumor Resistance	Research Yields Clues to Drug Resistance in Cancer Therapy	http://search.proquest.com/nytimes/docview/426965467/C061587382144BDAPQ/3?accountid=14512	Gina Kolata	1988-10-11	No	Develop
New York Times	Tumor Resistance	Blood-Pressure Drug Employed to Defuse Cancer Cell Defenses	http://search.proquest.com/nytimes/docview/108485679/fulltextPDF/C061587382144BDAPQ/1?accountid=14512	Gina Kolata	1990-06-05	No	Develop, Mutate
New York Times	Tumor Resistance	Insurer to Finance Test of Treatment for Breast Cancer	http://search.proquest.com/nytimes/docview/427859883/fulltext/C061587382144BDAPQ/39?accountid=14512	Lawrence K. Altman	1990-11-12	No	Develop
New York Times	Tumor Resistance	Patents; A Detection Method for Breast Tumors May Add Fire to a Debate Over Patents for Medical Treatments	http://search.proquest.com/nytimes/docview/430000729/fulltext/C061587382144BDAPQ/85?accountid=14512	Sabra Chartrand	1995-01-30	No	Develop
New York Times	Tumor Resistance	New Drug Approved As Backup Therapy For Ovarian Cancer	http://search.proquest.com/nytimes/docview/109550588/fulltextPDF/B80A66D797EA4F3DPQ/9?accountid=14512	Not Available	1996-05-30	No	Develop
New York Times	Tumor Resistance	Tests on Mice Block a Defense by Cancer	http://search.proquest.com/nytimes/docview/430870385/fulltext/C061587382144BDAPQ/27?accountid=14512	Nicholas Wade	1997-05-27	No	Develop, Emerge
New York Times	Tumor Resistance	A Lonely Warrior Against Cancer	http://search.proquest.com/nytimes/docview/430889995/fulltext/C061587382144BDAPQ/34?accountid=14512	Nicholas Wade	1997-12-09	No	Develop
New York Times	Tumor Resistance	A Cautious Awe Greets Drugs That Eradicate Tumors in Mice: [Special Report]	http://search.proquest.com/nytimes/docview/430981407/fulltext/C061587382144BDAPQ/90?accountid=14512	Gina Kolata	1998-05-03	No	Develop, Mutate
New York Times	Tumor Resistance	The New Cancer Hope: [Editorial]	http://search.proquest.com/nytimes/docview/430987874/fulltext/7A73D86DA88E4BDAPQ/33?accountid=14512	Not Available	1998-05-05	No	Develop
New York Times	Tumor Resistance	Anticancer Agent Appears To Add to Radiation's Effect	http://search.proquest.com/nytimes/docview/431009605/fulltext/C061587382144BDAPQ/120?accountid=14512	Nicholas Wade	1998-07-16	No	Develop
New York Times	Tumor Resistance	Progress Reported in Attacking Tumor Blood Supply	http://search.proquest.com/nytimes/docview/431139709/fulltext/C061587382144BDAPQ/64?accountid=14512	Nicholas Wade	1999-03-16	No	Develop
New York Times	Tumor Resistance	Study Suggests Why A Cancer Fighter Fails	http://search.proquest.com/nytimes/docview/431194703/fulltext/C061587382144BDAPQ/5?accountid=14512	Not Available	1999-07-30	No
New York Times	Tumor Resistance	New Gains Cited in Anti-Cancer Therapy	http://search.proquest.com/nytimes/docview/431240335/fulltext/C061587382144BDAPQ/32?accountid=14512	Nicholas Wade	1999-09-17	No	Develop
New York Times	Tumor Resistance	Scientists Develop a Mouses That Resists Some Cancers	http://search.proquest.com/nytimes/docview/431261764/fulltext/C061587382144BDAPQ/80?accountid=14512	Nicholas Wade	1999-10-14	No	Develop
New York Times	Tumor Resistance	Optimism Blooms on an Anti-Leukemia Pill	http://search.proquest.com/nytimes/docview/431323754/fulltext/D53DB7F60D164FDDPQ/212?accountid=14512	Not Available	1999-12-04	No	Develop
New York Times	Tumor Resistance	Fuzzy little test tube	http://search.proquest.com/nytimes/docview/215492998/fulltext/A89D9B9F2F7A4027PQ/114?accountid=14512	Osborne, Lawrence	2000-07-30	No
New York Times	Tumor Resistance	Powerful Anti-Cancer Drug Emerges from Basic Biology	http://search.proquest.com/nytimes/docview/431742533/fulltext/C061587382144BDAPQ/17?accountid=14512	Nicholas Wade	2001-05-08	No	Develop
New York Times	Tumor Resistance	Swift Apprival For a New Kind of Cancer	http://search.proquest.com/nytimes/docview/431757044/fulltext/C061587382144BDAPQ/11?accountid=14512	Not Available	2001-05-11	No	Develop
New York Times	Tumor Resistance	New Drug Fights Second Kind of Cancer	http://search.proquest.com/nytimes/docview/431755171/fulltext/C061587382144BDAPQ/35?accountid=14512	Lawrence K. Altman	2001-05-14	No	Develop
New York Times	Tumor Resistance	Cancer Doctors See New Era of Optimism	http://search.proquest.com/nytimes/docview/431741384/fulltext/C061587382144BDAPQ/6?accountid=14512	Lawrence K. Altman	2001-05-22	No	Develop, Mutate
New York Times	Tumor Resistance	Drugs May Turn Cancer into Manageable Disease	http://search.proquest.com/nytimes/docview/432791722/fulltext/C061587382144BDAPQ/10?accountid=14512	Andrew Pollack	2004-06-06	Yes	Mutate
New York Times	Tumor Resistance	Keeping Cancer Drug Effective	http://search.proquest.com/nytimes/docview/432927155/FCF08304DFAB4A35PQ/6?accountid=14512	Eric Nagourney	2004-11-02	No
New York Times	Tumor Resistance	Huge GeNome Project is Proposed to Fight Cancer	http://search.proquest.com/nytimes/docview/433005538/fulltext/C061587382144BDAPQ/16?accountid=14512	Andrew Pollack	2005-03-28	No	Mutate
New York Times	Tumor Resistance	Slowly, Cancer Genes Tender Their Secrets:...	http://search.proquest.com/nytimes/docview/433223777/fulltext/C061587382144BDAPQ/8?accountid=14512	Kolata Gina	2005-12-27	No	Develop
New York Times	Tumor Resistance	Cancer as a Disease, Not a Death Sentence	http://search.proquest.com/nytimes/docview/433866002/fulltext/C061587382144BDAPQ/23?accountid=14512	Jane E. Brody	2008-06-12	No	Develop
New York Times	Tumor Resistance	Protein Tied To Resistance To a Drug For Cancer	http://search.proquest.com/nytimes/docview/897212490/fulltextPDF/C061587382144BDAPQ/4?accountid=14512	Not Available	2008-11-13	No	Develop
New York Times	Tumor Resistance	New Treatment for Cancer Found to Work in Animals	http://search.proquest.com/nytimes/docview/434086342/fulltext/C061587382144BDAPQ/12?accountid=14512	Nicholas Wade	2009-06-29	Yes	Develop, Mutate
New York Times	Tumor Resistance	Taking Big Risk for Big Payoff, Industry Seeks Cancer Drugs	http://search.proquest.com/nytimes/docview/434194842/fulltext/C061587382144BDAPQ/41?accountid=14512	Andrew Pollack	2009-09-02	No	Develop
New York Times	Tumor Resistance	Living With a Formerly Fatal Blood Cancer	http://search.proquest.com/nytimes/docview/434272494/fulltext/C061587382144BDAPQ/29?accountid=14512	Jane E. Brody	2010-01-19	No	Develop, Mutate
New York Times	Tumor Resistance	The Cancer Sleeper Cell	http://search.proquest.com/nytimes/docview/762330642/C061587382144BDAPQ/2?accountid=14512	Siddhartha Mukherjee	2010-10-31	Yes	Mutate, Adapt, Acquire
New York Times	Tumor Resistance	In Body's Shield Against Cancer, a Culprit in Aging may lurk	http://search.proquest.com/nytimes/docview/905194037/fulltext/C061587382144BDAPQ/31?accountid=14512	Nicholas Wade	2011-11-22	No	Develop
New York Times	Tumor Resistance	Two Drugs Appear to Delay Progression of Breast Cancer: [Business/Financial Desk]	http://search.proquest.com/nytimes/docview/909200106/fulltext/A89D9B9F2F7A4027PQ/54?accountid=14512	Andrew Pollack	2011-12-08	No
New York Times	Tumor Resistance	FDA Approves Drugs for Cancer and Myeloma	http://search.proquest.com/nytimes/docview/1027169560/fulltext/C061587382144BDAPQ/22?accountid=14512	Andrew Pollack	2012-07-21	No
New York Times	Tumor Resistance	F.D.A. Gives Early Approval To Drug for Rare Leukemia: [Business/Financial Desk]	http://search.proquest.com/nytimes/docview/1238422027/fulltext/C061587382144BDAPQ/93?accountid=14512	Andrew Pollack	2012-12-15	No	Develop, Mutate
New York Times	Tumor Resistance	Promising New Cancer Drugs Empower the Body's Own Defense System	http://search.proquest.com/nytimes/docview/1362012594/fulltext/C061587382144BDAPQ/49?accountid=14512	Andrew Pollack	2013-06-04	No	Develop, Mutate
New York Times	Tumor Resistance	Tiny Patients, Major Goals: [Science Desk]	http://search.proquest.com/nytimes/docview/1366216910/fulltext/C061587382144BDAPQ/89?accountid=14512	Gina Kolata	2013-06-11	No	Develop, Mutate
New York Times	Tumor Resistance	Breaking Cancer's Shield	http://search.proquest.com/nytimes/docview/1441767677/fulltext/C061587382144BDAPQ/25?accountid=14512	Kolata Gina	2013-10-15	No	Develop
New York Times	Tumor Resistance	A Study on Prostate Cancer Relapse Suggest That Hormone Therapy Can Wait	http://search.proquest.com/nytimes/docview/1524323848/fulltext/C061587382144BDAPQ/24?accountid=14512	Andrew Pollack	2014-05-15	No	Mutate
New York Times	Tumor Resistance	Finding Clues in Genes of 'Exceptional Responders': [National Desk]	http://search.proquest.com/nytimes/docview/1609244874/fulltext/EC4B8DC7300A4824PQ/110?accountid=14512	Gina Kolata	2014-10-09	No	Mutate
New York Times	Tumor Resistance	New Blood Test Shows Promise in Cancer Fight	http://search.proquest.com/nytimes/docview/1674151546/fulltext/C061587382144BDAPQ/21?accountid=14512	Kolata Gina	2015-04-20	No	Develop, Emerge, Mutate
Newark Star-Ledger	Tumor Resistance	Breast Cancer	http://infoweb.newsbank.com/resources/doc/nb/news/12248D9E9B63A478?p=AWNB	Joan Whitlow	1994-10-24	No
Newark Star-Ledger	Tumor Resistance	How last-ditch drug got fast OK - Teamwork and desperation sped a cancer pill's debut	http://infoweb.newsbank.com/resources/doc/nb/news/0EFDA4EA80306E89?p=AWNB	Kitta MacPherson	1998-07-12	No	Develop
Newark Star-Ledger	Tumor Resistance	Beating the odds - Patients survive deadliest cancers as therapies advanceHide Details	http://infoweb.newsbank.com/resources/doc/nb/news/10E973CB1E442F28?p=AWNB	Carol Ann Campbell	2005-12-18	No	Develop
Newark Star-Ledger	Tumor Resistance	Study shows patients on Gleevec improve - Also, a sexually transmitted virus is being linked to more cancers; Web site has more info	http://infoweb.newsbank.com/resources/doc/nb/news/11211D3BB0CF646C?p=AWNB	Carol Ann Campbell	2006-06-05	No	Develop
Newark Star-Ledger	Tumor Resistance	Cancer center celebrates its past, redefines the future	http://infoweb.newsbank.com/resources/doc/nb/news/118C3B1E91266568?p=AWNB	Carol Ann Campbell	2007-04-26	No	Develop
Newark Star-Ledger	Tumor Resistance	Overweight patients receive lower chemo doses, study finds	http://infoweb.newsbank.com/resources/doc/nb/news/148F220FEA77BFF8?p=AWNB	Marilynn Marchione	2013-09-20	No	Develop
Newark Star-Ledger	Tumor Resistance	THE BIG TEN	http://infoweb.newsbank.com/resources/doc/nb/news/102B95155AE384B9?p=AWNB	Susan Todd	2015-05-21	No
Newark Star-Ledger	Tumor Resistance	STUDIES SHOW PROMISE IN NEW ANTI-CANCER DRUGSHide Details	http://infoweb.newsbank.com/resources/doc/nb/news/1224746474D72D08?p=AWNB	Joan Whitlow	2015-06-09	No	Develop
Newark Star-Ledger	Tumor Resistance	RUTGERS RESEARCHER'S STUDY OFFERS NEW APPROACH TO PROSTATE CANCER	http://infoweb.newsbank.com/resources/doc/nb/news/1570E70AF4D279E8?p=AWNB	Tim Darragh	2015-08-06	No	Develop
Philadelphia Inquirer	Tumor Resistance	A HOPEFUL REPORT IN THE CANCER WAR	http://infoweb.newsbank.com/resources/doc/nb/news/0EB2A0616C4D5A54?p=AWNB	Marian Uhlman	1990-05-20	No
Philadelphia Inquirer	Tumor Resistance	GENE THERAPY TO BE TRIED TO SHIELD AGAINST FATAL DOSE OF CANCER DRUG THE TECHNIQUE MAY ALLOW DOCTORS TO TREAT PATIENTS WITH HIGHER DOSES OF CHEMOTHERAPY.	http://infoweb.newsbank.com/resources/doc/nb/news/0EB2A36332951443?p=AWNB	Daniel Q. Haney	1992-05-21	No	Develop
Philadelphia Inquirer	Tumor Resistance	STARVING A TUMOR THERE WAS RECENT EXCITEMENT OVER ANGIOSTATIN AND ENDOSTATIN, TWO DRUGS THAT WERE SHOWN TO HAVE CUT OFF THE BLOOD SUPPLY TO TUMORS. THEY WORKED WELL ON MICE, BUT WILL THEY WORK ON HUMANS?	http://infoweb.newsbank.com/resources/doc/nb/news/0EB32FFC9426EEDC?p=AWNB	Marie McCullough	1998-05-18	No	Develop, Mutate
Philadelphia Inquirer	Tumor Resistance	A NEW FOCUS IN THE FIGHT RESEARCHERS ARE ATTACKING CANCER ON A GENETIC LEVEL, ZEROING IN ON THE WAYS FAULTY GENES WREAK HAVOC. HERCEPTIN, FIRST IN A NEW CLASS OF DRUGS, IS A PRODUCT OF THIS THINKING	http://infoweb.newsbank.com/resources/doc/nb/news/0EB330232D219971?p=AWNB	Faye Flam	1998-06-22	No	Develop
Philadelphia Inquirer	Tumor Resistance	AN EXPERIMENTAL PILL SEEMS TO COMBAT ONE FORM OF LEUKEMIA IN EARLY TESTS, IT AIDED EVERY PATIENT WHO WAS NoT HELPED BY STANDARD TREATMENT FOR CHRONIC MYELOGENoUS LEUKEMIA.	http://infoweb.newsbank.com/resources/doc/nb/news/0EB5CF02106D3E3C?p=AWNB	Janet McConnaughey	1999-12-04	No	Develop
Philadelphia Inquirer	Tumor Resistance	Scientists find a key to disrupting cancer - A molecule that keeps drugs from killing cancerous cells might lead to new treatments.	http://infoweb.newsbank.com/resources/doc/nb/news/0EF33A078285DD70?p=AWNB	Not Available	2001-10-15	No	Develop
Philadelphia Inquirer	Tumor Resistance	Drug is found to reduce risk of breast-cancer recurrence - The estrogen suppressor is used after tamoxifen. Results were so positive that a study ended early.	http://infoweb.newsbank.com/resources/doc/nb/news/0FE1DC4C117AE809?p=AWNB	Tom Cohen	2003-10-10	No	Develop
Philadelphia Inquirer	Tumor Resistance	Cancer treatment news hits home	http://infoweb.newsbank.com/resources/doc/nb/news/0FE2D963081D556E?p=AWNB	Marie McCulough	2003-10-11	No	Develop
Philadelphia Inquirer	Tumor Resistance	Targeted therapies: A quest for miracles	http://infoweb.newsbank.com/resources/doc/nb/news/107928EA3AAB9997?p=AWNB	Fawn Vrazo	2005-12-09	No	Develop, Mutate
Philadelphia Inquirer	Tumor Resistance	Breast-cancer risk cut with osteoporosis drug - In a large government study, Evista worked as well as the traditional tamoxifen, but with fewer serious side effects.	http://infoweb.newsbank.com/resources/doc/nb/news/1111750139FDE2E0?p=AWNB	Marie McCulough	2006-04-18	No	Develop
Philadelphia Inquirer	Tumor Resistance	Project will map genes of tumors	http://infoweb.newsbank.com/resources/doc/nb/news/138102A4922B9898?p=AWNB	Helen Shen	2011-06-20	No	Mutate
Philadelphia Inquirer	Tumor Resistance	Drug offers hope on child cancer	http://infoweb.newsbank.com/resources/doc/nb/news/141D3E5781622BF8?p=AWNB	Faye Flam	2012-05-21	No	Acquire
Philadelphia Inquirer	Tumor Resistance	Can cancer be figured out? - While uncovering ever more new steps, science comes closer to a cure.Hide Details	http://infoweb.newsbank.com/resources/doc/nb/news/1409CB38D2D6D870?p=AWNB	Margie Patlak	2012-07-25	No	Develop
Philadelphia Inquirer	Tumor Resistance	Back from the brink, again - Alex Rotzal, 21, heart patient since birth, is Now a cancer survivor, too. In his new Philly.com blog, the Temple math major will chronicle his reentry into everyday life.	http://infoweb.newsbank.com/resources/doc/nb/news/141A970488E93060?p=AWNB	Meeri Kim	2012-10-01	No	Mutate
Philadelphia Inquirer	Tumor Resistance	Liquid biopsies gain ground as an alternative	http://infoweb.newsbank.com/resources/doc/nb/news/150E920A49B87AC8?p=AWNB	Ilene Raymond Rush	2014-10-12	No
Salt Lake City Deseret News	Tumor Resistance	SYNTHETIC SUBSTITUTES FOR TAXOL SOUGHT	http://infoweb.newsbank.com/resources/doc/nb/news/0F3608594B59BA71?p=AWNB	Thompson, Jan	1993-01-30	No	Develop
Salt Lake City Deseret News	Tumor Resistance	CAN DRUG HELP THWART LUNG CANCER?	http://infoweb.newsbank.com/resources/doc/nb/news/0F360AD937BB3F4E?p=AWNB	Not Available	1994-08-11	No
Salt Lake City Deseret News	Tumor Resistance	New leukemia pill also helps with incurable tumor	http://infoweb.newsbank.com/resources/doc/nb/news/0F369C9F734F9FA6?p=AWNB	Not Available	2001-05-14	No	Develop
Salt Lake City Deseret News	Tumor Resistance	Study may offer clues to protein's skin cancer role - S.L. research focuses on a form of cell death	http://infoweb.newsbank.com/resources/doc/nb/news/0F369DE8ABDD219C?p=AWNB	Collins, Lois M.	2001-11-04	No
Salt Lake City Deseret News	Tumor Resistance	Chips may aid cancer fight	http://infoweb.newsbank.com/resources/doc/nb/news/0FB746FDA7412E23?p=AWNB	Ackerman, Todd	2003-06-03	No	Acquire
Salt Lake City Deseret News	Tumor Resistance	Drug cuts cancer recurrence	http://infoweb.newsbank.com/resources/doc/nb/news/0FE1BB1FC162D93F?p=AWNB	Cohen, Tom	2003-10-10	No	Develop
Salt Lake City Deseret News	Tumor Resistance	Teeny-tiny bubbles can zap tumors, U. researchers say	http://infoweb.newsbank.com/resources/doc/nb/news/11A54611CEAA45C0?p=AWNB	Jarvik, Elaine	2007-07-11	No	Develop
Salt Lake City Deseret News	Tumor Resistance	Researchers tackle gene mutation resistance in leukemia patients	http://infoweb.newsbank.com/resources/doc/nb/news/14FD7F696E261A28?p=AWNB	Leonard, Wendy	2014-08-21	No	Mutate
San Francisco Chronicle	Tumor Resistance	Cancer Makes Cells Resistant To Drug Therapy, Study Shows	http://infoweb.newsbank.com/resources/doc/nb/news/0EB4EE8B73D65F91?p=AWNB	Washington Post	1986-05-27	No	Develop
San Francisco Chronicle	Tumor Resistance	MisdiagNosis - Failure of promising cancer treatment leads to soul searching by researchers, drug firms	http://infoweb.newsbank.com/resources/doc/nb/news/0F378CE42A203D22?p=AWNB	Bernadette Tansey	2002-05-12	No	Mutate, Develop
San Francisco Chronicle	Tumor Resistance	Cancer sleuthing - Bay Area companies among those profiling the disease	http://infoweb.newsbank.com/resources/doc/nb/news/0FC252CB61EEA24C?p=AWNB	Bernadette Tansey	2003-07-06	No	Develop
San Francisco Chronicle	Tumor Resistance	A crowded field in cancer research - Hundreds of test therapies in the works	http://infoweb.newsbank.com/resources/doc/nb/news/115469CBCFE7D2B8?p=AWNB	Bernadette Tansey	2006-05-08	Yes	Develop, Mutate
San Francisco Chronicle	Tumor Resistance	Genentech gets research partner - Biotech firms plan to attack defenses of cancer cells	http://infoweb.newsbank.com/resources/doc/nb/news/1131C9B9724391A8?p=AWNB	Bernadette Tansey	2006-07-26	No	Develop
San Francisco Chronicle	Tumor Resistance	ProgNosis after recurrence is improving - There's No cure, but some women survive a decade or longer	http://infoweb.newsbank.com/resources/doc/nb/news/1180E196AAF62B40?p=AWNB	Erin Allday	2007-03-23	No	Develop
San Francisco Chronicle	Tumor Resistance	Some cancer drugs might let disease return	http://infoweb.newsbank.com/resources/doc/nb/news/126B39FCC1EB3600?p=AWNB	Bernadette Tansy	2009-03-03	No
San Francisco Chronicle	Tumor Resistance	FDA OKs new cancer drug by Genentech	http://infoweb.newsbank.com/resources/doc/nb/news/13F4BD48B8306640?p=AWNB	Victoria Colliver	2012-06-09	No	Develop
San Francisco Chronicle	Tumor Resistance	A PATIENT'S VOICE / Larry Stupski Prostate cancer patient hopes for individualized treatments	http://infoweb.newsbank.com/resources/doc/nb/news/141F7E138AD072A8?p=AWNB	Victoria Colliver	2012-10-17	No	Develop
San Francisco Chronicle	Tumor Resistance	DISEASEUCSF helping improve prostate cancer care	http://infoweb.newsbank.com/resources/doc/nb/news/141F7E138D71D560?p=AWNB	Victoria Colliver	2012-10-17	No	Develop, Adapt
St. Paul Pioneer Press	Tumor Resistance	Gene Therapy May Trick Tumors/Cell Research Aims for Higher Doses of Cancer Drugs	http://infoweb.newsbank.com/resources/doc/nb/news/0EB5DBD258E8E6CF?p=AWNB	Associated Press	1992-05-21	No	Develop
St. Paul Pioneer Press	Tumor Resistance	U Builds Bridges To Business - Research Chief Tim Mulcahy Works Hard to Create Partnerships Between the University of Minnesota and Cutting-Edge Companies in the State	http://infoweb.newsbank.com/resources/doc/nb/news/113DF46C12F9AE68?p=AWNB	Dave Beal	2006-08-27	No
St. Paul Pioneer Press	Tumor Resistance	Cancer Therapy Works Swiftly in Animal Testing - Method is Specific and More Focused	http://infoweb.newsbank.com/resources/doc/nb/news/129271E9E6A441F8?p=AWNB	Nicholas Wade	2009-06-29	Yes	Develop
USA Today	Tumor Resistance	Heart drug may strengthen cancer therapy	http://infoweb.newsbank.com/resources/doc/nb/news/0ED02A8B4F5A0120?p=AWNB	Dan Sperling	1988-09-20	No	Develop
USA Today	Tumor Resistance	WASHINGTON - Early results reported Monday on a trailblazing experiment this spring show that new genes can be added to human beings and that gene therapy is a realistic option for the future.	http://infoweb.newsbank.com/resources/doc/nb/news/128208AB2AA52128?p=AWNB	Tim Friend	1989-09-18	No
USA Today	Tumor Resistance	Drug-resistant genes as vehicles for a cure	http://infoweb.newsbank.com/resources/doc/nb/news/0EB771AAC2662C43?p=AWNB	n/a	1993-04-06	No
USA Today	Tumor Resistance	Test helps predict cancer recurrence	http://infoweb.newsbank.com/resources/doc/nb/news/127DDA1DD669B778?p=AWNB	Tracy Pipp	1998-04-07	No	Develop
USA Today	Tumor Resistance	Two new 'targeted' leukemia drugs show promise	http://infoweb.newsbank.com/resources/doc/nb/news/106D2D57CDA3D026?p=AWNB	Liz Szabo	2004-12-06	No	Develop, Mutate
USA Today	Tumor Resistance	Leukemia, stem cell scientists get Laskers - NYC mayor wins, too	http://infoweb.newsbank.com/resources/doc/nb/news/12AB7D7C3A742838?p=AWNB	Elizabeth Weise	2009-09-14	No
USA Today	Tumor Resistance	Drug trials pose dilemma for melaNoma patients	http://infoweb.newsbank.com/resources/doc/nb/news/137FECF16012FFA0?p=AWNB	Not available	2011-06-18	No	Acquire, Develop
USA Today	Tumor Resistance	Mayo, TGen close in on personalized gene therapy	http://infoweb.newsbank.com/resources/doc/nb/news/1412EC1009B72308?p=AWNB	Not available	2012-09-06	No	Develop
Wall Street Journal	Tumor Resistance	Biological Weapon: Engineered Antibodies Show Great Promise In Fighting Cancer --- They Revive Scientists' Hopes Of Finding 'Magic Bullets' That Zap Malignant Cells --- Next: Large Clinical Studies	http://search.proquest.com/wallstreetjournal/docview/398090198/1ED9B48453824E54PQ/39?accountid=14512	Jerry E. Bishop	1989-07-10	No	Develop
Wall Street Journal	Tumor Resistance	Cancer Doctors Aim to Improve Chemotherapy	http://search.proquest.com/wallstreetjournal/docview/135676312/fulltextPDF/351E7FB15273459EPQ/2?accountid=14512	Marilyn Chase	1992-05-21	No
Wall Street Journal	Tumor Resistance	Genelabs TechNologies Inc.: Human Clinical Tests Sought for Anti-Cancer Treatment	http://search.proquest.com/wallstreetjournal/docview/398329290/CC96EB7200714BD1PQ/43?accountid=14512	Not Available	1992-12-29	No	Develop
Wall Street Journal	Tumor Resistance	Business Brief -- Genelabs TechNologies Inc.: Concern's New Cancer Drug Is in Clinical Trial for Safety	http://search.proquest.com/wallstreetjournal/docview/398518780/CC96EB7200714BD1PQ/28?accountid=14512	Not Available	1993-04-22	No	Develop
Wall Street Journal	Tumor Resistance	Escagenetics Corp.: Company, Enzon to work on improving cancer drug	http://search.proquest.com/wallstreetjournal/docview/398359654/CC96EB7200714BD1PQ/23?accountid=14512	Not Available	1993-09-01	No	Develop
Wall Street Journal	Tumor Resistance	Health Brief -- Eli Lilly & Co.: Cancer-Drug Compounds Are Licensed From Syntex	http://search.proquest.com/wallstreetjournal/docview/398527286/1ED9B48453824E54PQ/70?accountid=14512	Not Available	1994-09-30	No	Develop
Wall Street Journal	Tumor Resistance	Cancer Drug Surprises Researchers With 'Double-Barrel' Attack on Tumors	http://search.proquest.com/wallstreetjournal/docview/1023816200/fulltextPDF/1ED9B48453824E54PQ/47?accountid=14512	Jerry E. Bishop	1995-04-19	No	Develop
Wall Street Journal	Tumor Resistance	Business Brief -- ENTREMED INC.: Shares Surge After Release Of Cancer-Therapy Data	http://search.proquest.com/wallstreetjournal/docview/398809152/1A3DFAA5B7844334PQ/120?accountid=14512	Not Available	1997-12-01	No
Wall Street Journal	Tumor Resistance	A Very Delicate Cargo Is on the Move Along I-10	http://search.proquest.com/wallstreetjournal/docview/398747445/fulltext/15EE3E050B08462EPQ/256?accountid=14512	Mary Flood	1999-07-28	No	Develop
Wall Street Journal	Tumor Resistance	Slimy Solution: As Common as Dirt, Bacteria May Yield Powerful Cancer Drug --- Tests by Bristol-Myers Show Therapy Shrinks Tumors That Taxol Can't Treat --- Novartis, Others Join Race	http://search.proquest.com/wallstreetjournal/docview/398714222/1ED9B48453824E54PQ/5?accountid=14512	Michael Waldholz	2000-01-27	Yes	Develop, Mutate
Wall Street Journal	Tumor Resistance	`Wonder Drug' For Leukemia Suffers Setback	http://search.proquest.com/wallstreetjournal/docview/398774859/1ED9B48453824E54PQ/76?accountid=14512	David P Hamilton and Vanessa Fuhrmans	2001-06-22	No	Develop
Wall Street Journal	Tumor Resistance	Johnson & Johnson Sets Pact to Market Zeltia Cancer Drug	http://search.proquest.com/wallstreetjournal/docview/398760108/1ED9B48453824E54PQ/64?accountid=14512	Keith Johnson and Scott Hensley	2001-08-13	No
Wall Street Journal	Tumor Resistance	Cancer-Gene Drugs Flourish, Yielding Hope, but No Quick Fix	http://search.proquest.com/wallstreetjournal/docview/398798275/351E7FB15273459EPQ/1?accountid=14512	Michael Waldholz	2002-05-16	No	Develop, Mutate
Wall Street Journal	Tumor Resistance	Gleevec Wows Cancer Meeting --- Novartis Drug Pushes Back Disease in Two Studies, But Broader Use Doubted	http://search.proquest.com/wallstreetjournal/docview/398922171/1ED9B48453824E54PQ/4?accountid=14512	Ron Winslow and Vanessa Fuhrams	2002-05-21	No	Develop
Wall Street Journal	Tumor Resistance	Gleevec's Success Spurs New Cancer Drugs	http://search.proquest.com/wallstreetjournal/docview/398805345/1ED9B48453824E54PQ/12?accountid=14512	Ron Winslow	2002-06-13	No	Develop
Wall Street Journal	Tumor Resistance	Pfizer Drug Steps In After Gleevec --- When Resistence Develops To Key Cancer Treatment, New Compound May Help	http://search.proquest.com/wallstreetjournal/docview/398826295/1ED9B48453824E54PQ/29?accountid=14512	Ron Winslow	2003-06-03	No	Develop
Wall Street Journal	Tumor Resistance	Cancer Cells Appear To Be Unusually Adept At Dodging Therapies	http://search.proquest.com/wallstreetjournal/docview/398934358/1ED9B48453824E54PQ/3?accountid=14512	Sharon Begley	2003-07-11	No	Develop
Wall Street Journal	Tumor Resistance	Gleevec Provides Scientists Clues To More Drugs	http://search.proquest.com/wallstreetjournal/docview/398867793/1ED9B48453824E54PQ/61?accountid=14512	Vanessa Fuhrmans	2004-06-16	No	Develop, Emerge, Mutate
Wall Street Journal	Tumor Resistance	Personal Health (A Special Report): Essay; Beating Back Cancer...Again: Ten years without leukemia meant everything was supposed to be OK; It wasn't	http://search.proquest.com/wallstreetjournal/docview/398933045/3F884ECDCA145F0PQ/52?accountid=14512	Laura Landro	2004-10-11	No
Wall Street Journal	Tumor Resistance	New Leukemia Drugs May Prove More Potent Than Gleevec	http://search.proquest.com/wallstreetjournal/docview/399041281/1ED9B48453824E54PQ/75?accountid=14512	Ron Winslow and Jeanne Whalen	2004-12-06	Yes	Develop, Mutate
Wall Street Journal	Tumor Resistance	Prostate-Cancer Treatment Shows Promise; Small Study Could Renew Interest In Vaccines That Target Tumors; Keeping Expectations in Check	http://search.proquest.com/wallstreetjournal/docview/398975992/C86DF98C121A44A5PQ/6?accountid=14512	David Hamilton	2005-02-17	No
Wall Street Journal	Tumor Resistance	Quitting Cancer Drugs; Doctors Test Whether Patients Can Safely Stop Taking Targeted Therapies After Years of Use	http://search.proquest.com/wallstreetjournal/docview/398953605/1ED9B48453824E54PQ/32?accountid=14512	Amy Dockser Marcus	2005-05-03	No	Develop, Mutate
Wall Street Journal	Tumor Resistance	Cancer Drug, Deemed Failure, Helps Asians	http://search.proquest.com/wallstreetjournal/docview/398930346/C86DF98C121A44A5PQ/7?accountid=14512	Nicholas Zamiska	2005-05-05	No
Wall Street Journal	Tumor Resistance	Pfizer Rides Wave of Cancer Drugs; Oncology Conference Buzzes About Success of Various New 'Targeted' Medicines	http://search.proquest.com/wallstreetjournal/docview/398915435/1ED9B48453824E54PQ/8?accountid=14512	Scott Hensley and David Hamilton	2005-05-16	No	Develop
Wall Street Journal	Tumor Resistance	Novartis, SGX Pair Up to Develop Leukemia Drugs	http://search.proquest.com/wallstreetjournal/docview/399052657/15EE3E050B08462EPQ/194?accountid=14512	Ron Winslow	2006-03-28	No	Develop
Wall Street Journal	Tumor Resistance	Leukemia Tests Take New Approach; Blood-Plasma Assessment Shows Improved Accuracy, Could Replace Biopsies	http://search.proquest.com/wallstreetjournal/docview/398940446/fulltext/EE36B6418630431EPQ/132?accountid=14512	Darren McDermott	2006-03-28	No	Mutate
Wall Street Journal	Tumor Resistance	Targeted Cancer Drugs Gain Backers	http://search.proquest.com/wallstreetjournal/docview/398989582/fulltext/1ED9B48453824E54PQ/48?accountid=14512	Ron Winslow and Jeanne Whalen	2006-06-05	No	Develop
Wall Street Journal	Tumor Resistance	Cancer Pills Prompt Compliance Worries	http://search.proquest.com/wallstreetjournal/docview/399149568/CC96EB7200714BD1PQ/71?accountid=14512	Thomas Gryta	2009-06-10	No	Develop
Wall Street Journal	Tumor Resistance	Roche Drug Shrinks Tumors in Study	http://search.proquest.com/wallstreetjournal/docview/399098771/1ED9B48453824E54PQ/72?accountid=14512	Ron Winslow	2009-09-03	No	Develop
Wall Street Journal	Tumor Resistance	Health & Wellness: Diabetes Medication May Get New Life as Cancer Treatment	http://search.proquest.com/wallstreetjournal/docview/399133018/1ED9B48453824E54PQ/22?accountid=14512	Ron Winslow	2009-09-15	No	Acquire
Wall Street Journal	Tumor Resistance	U.S. News: FDA Is Easing Way for Drug Cocktails --- Agency Draws Up Guidelines for Approving Two or More New Drugs Together to Fight Deadly Diseases Such as TB, AIDS	http://search.proquest.com/wallstreetjournal/docview/399088719/fulltext/EE36B6418630431EPQ/126?accountid=14512	Mark Schoofs	2010-03-18	No	Develop, Mutate
Wall Street Journal	Tumor Resistance	New Breast Cancer Drug Found Deep In the Sea	http://search.proquest.com/wallstreetjournal/docview/822070324/1ED9B48453824E54PQ/7?accountid=14512	Peter Landers	2011-01-04	No	Develop
Wall Street Journal	Tumor Resistance	Major Shift in War on Cancer; Drug Studies Focus on Genes of Individual Patients; Testing Obstacles Loom	http://search.proquest.com/wallstreetjournal/docview/870264211/1ED9B48453824E54PQ/33?accountid=14512	Ron Winslow	2011-06-05	No	Develop
Wall Street Journal	Tumor Resistance	Novartis to File Drug for Breast Cancer	http://search.proquest.com/wallstreetjournal/docview/874571375/1ED9B48453824E54PQ/34?accountid=14512	Goran Mijuk	2011-06-05	No	Develop
Wall Street Journal	Tumor Resistance	Major Shift in War on Cancer --- Drug Studies Focus on Genes of Individual Patients; Testing Obstacles Loom	http://search.proquest.com/wallstreetjournal/docview/870277642/1ED9B48453824E54PQ/40?accountid=14512	Ron Winslow	2011-06-06	No	Develop
Wall Street Journal	Tumor Resistance	Cancer-Drug Alliances Expected to Increase	http://search.proquest.com/wallstreetjournal/docview/870401529/1ED9B48453824E54PQ/17?accountid=14512	Thomas Gryta	2011-06-07	No	Develop
Wall Street Journal	Tumor Resistance	Enlisting the Body to Fight Cancer	http://search.proquest.com/wallstreetjournal/docview/871510419/1ED9B48453824E54PQ/45?accountid=14512	Thomas Gryta	2011-06-14	No	Develop
Wall Street Journal	Tumor Resistance	Novartis Drug Seeks Wider Use	http://search.proquest.com/wallstreetjournal/docview/874961736/EE36B6418630431EPQ/86?accountid=14512	Goran Mijuk	2011-07-06	No	Develop
Wall Street Journal	Tumor Resistance	Guided By Genes, Shrinking Cancer; A Big Step for 'Personalized Medicine' With Approval of Roche Drug; Results 'Take Your Breath Away'	http://search.proquest.com/wallstreetjournal/docview/884129761/1ED9B48453824E54PQ/52?accountid=14512	Jonathon Rockoff	2011-08-18	No	Develop
Wall Street Journal	Tumor Resistance	Pfizer's Future: A Niche Blockbuster	http://search.proquest.com/wallstreetjournal/docview/885664300/15EE3E050B08462EPQ/160?accountid=14512	Jonathin D Rockoff	2011-08-30	No	Develop
Wall Street Journal	Tumor Resistance	Drugs Keep Tumors at Bay; New Breast-Cancer Therapies Significantly Slow Progress of Metastatic Disease	http://search.proquest.com/wallstreetjournal/docview/909062584/1A3DFAA5B7844334PQ/100?accountid=14512	Ron Winslow	2011-12-08	No
Wall Street Journal	Tumor Resistance	Personalized Rx for Children; Pfizer's Xalkori, Used in Adults With Lung Cancer, Appears Effective Against Rare Childhood Tumors	http://search.proquest.com/wallstreetjournal/docview/1013855987/1ED9B48453824E54PQ/51?accountid=14512	Ron Winslow	2012-05-16	No	Develop
Wall Street Journal	Tumor Resistance	Cancer Center Sets $3 Billion Program	http://search.proquest.com/wallstreetjournal/docview/1041286062/1A3DFAA5B7844334PQ/111?accountid=14512	Ron Winslow	2012-09-21	No	Develop
Wall Street Journal	Tumor Resistance	Stem-Cell Trial Without Embryo Destruction	http://search.proquest.com/wallstreetjournal/docview/1238008341/fulltext/D8EA6014C5EA4FC9PQ/129?accountid=14512	Jonathan Rockoff	2012-12-14	No	Develop
Wall Street Journal	Tumor Resistance	New Drugs Slow a Fast-Spreading Cancer	http://search.proquest.com/wallstreetjournal/docview/1314418591/1ED9B48453824E54PQ/6?accountid=14512	Jonathan Rockoff	2013-03-05	No	Develop
Wall Street Journal	Tumor Resistance	The Guided-Missile Cancer Treatment; Drug conjugates attack specific tumor cells, rather than healthy and unhealthy cells alike	http://search.proquest.com/wallstreetjournal/docview/1323986047/1ED9B48453824E54PQ/9?accountid=14512	Jonathan Rockoff	2013-04-05	No	Develop
Wall Street Journal	Tumor Resistance	Health Care (A Special Report) --- The Guided-Missile Cancer Treatment: Drug conjugates attack specific tumor cells, rather than healthy and unhealthy cells alike	http://search.proquest.com/wallstreetjournal/docview/1324451367/1ED9B48453824E54PQ/13?accountid=14512	Jonathan Rockoff	2013-04-09	No	Develop
Wall Street Journal	Tumor Resistance	Pfizer Drug Delays Worsening of Lung Cancer vs. Chemotherapy	http://search.proquest.com/wallstreetjournal/docview/1357291517/1ED9B48453824E54PQ/15?accountid=14512	Peter Loftus	2013-06-01	No	Develop
Wall Street Journal	Tumor Resistance	Drug Stalls Rare Thyroid Cancer	http://search.proquest.com/wallstreetjournal/docview/1357395407/1ED9B48453824E54PQ/63?accountid=14512	Joseph Walker	2013-06-02	No	Develop
Wall Street Journal	Tumor Resistance	A Battle Against Wayward Genes; The story of how ingenious medical researchers and big pharma teamed up to defeat a rare form of leukemia.	http://search.proquest.com/wallstreetjournal/docview/1389529868/fulltext/EE36B6418630431EPQ/145?accountid=14512	Laura Landro	2013-07-04	No	Develop
Wall Street Journal	Tumor Resistance	Gene Breakthroughs Spark a Revolution in Cancer Treatment	http://search.proquest.com/wallstreetjournal/docview/1419739806/1ED9B48453824E54PQ/49?accountid=14512	Ron Winslow	2013-08-13	No	Develop
Wall Street Journal	Tumor Resistance	Q&A: How Do Targeted Cancer Therapies Work?; More Drugs Are Available that Target Genetic Mutations	http://search.proquest.com/wallstreetjournal/docview/1419790344/1ED9B48453824E54PQ/73?accountid=14512	Ron Winslow	2013-08-13	No	Develop
Wall Street Journal	Tumor Resistance	REVIEW --- Books: KNowing Is Only Half the Battle	http://search.proquest.com/wallstreetjournal/docview/1427422129/1ED9B48453824E54PQ/77?accountid=14512	Laura Landro	2013-08-24	No	Emerge
Wall Street Journal	Tumor Resistance	Novartis Drug Shows Promise in Rare Lung Cancer	http://search.proquest.com/wallstreetjournal/docview/1510296408/1ED9B48453824E54PQ/10?accountid=14512	Ron Winslow	2014-03-26	No	Develop
Wall Street Journal	Tumor Resistance	Sloan Kettering Gets $100 Million Gift; Henry Kravis and His Wife Make Donation to Aid Cancer Research, Treatment	http://search.proquest.com/wallstreetjournal/docview/1525837725/1A3DFAA5B7844334PQ/138?accountid=14512	Ron Winslow	2014-05-19	No	Develop
Wall Street Journal	Tumor Resistance	New ImmuNotherapy Drug Data Show Promise in Treating Cancer; Drugs From Bristol-Myers and Merck Shown to Prolong Lives of Some Cancer Patients	http://search.proquest.com/wallstreetjournal/docview/1531038476/1ED9B48453824E54PQ/67?accountid=14512	Peter Loftus	2014-06-02	No	Develop
Wall Street Journal	Tumor Resistance	Early Promise: Super-Survivors Fuel Cancer Hope	http://search.proquest.com/wallstreetjournal/docview/1634001021/1ED9B48453824E54PQ/18?accountid=14512	Ron Winslow	2014-12-05	No	Develop
Wall Street Journal	Tumor Resistance	Cancer's Super-Survivors; How the Promise of ImmuNotherapy Is Transforming Oncology; Cancer Super-Survivors Are Charting New Territory	http://search.proquest.com/wallstreetjournal/docview/1630007887/CC96EB7200714BD1PQ/68?accountid=14512	Ron Winslow	2014-12-14	No	Develop, Mutate
Cleveland Plain Dealer	Weed Pesticide Resistance	GENETIC ENGINEERING RAISES A THREAT OF `SUPERWEEDS'	http://infoweb.newsbank.com/resources/doc/nb/news/0F80D072A681D88D?p=AWNB	JEFF BARNARD ASSOCIATED PRESS	1998-09-03	No	Emerge
Cleveland Plain Dealer	Weed Pesticide Resistance	New herbicide used to fight ‘superweeds’ sprouts multiple opinions about its use Many say it will aid crops; others worry about environment	http://infoweb.newsbank.com/resources/doc/nb/news/1511FC7C89683018?p=AWNB	Debbi SNook	2014-10-22	No	Develop, Adapt
Denver Post	Weed Pesticide Resistance	Biotech menu serves up conflict Engineering benefits, risks confront public	http://infoweb.newsbank.com/resources/doc/nb/news/0EC50F0FE16FA177?p=AWNB	Ann Schrader and Steve Raabe Denver Post Staff Writers FIELD OF GENES	2001-05-27	No	Acquire
Denver Post	Weed Pesticide Resistance	County may let modified beets grow on its land	http://infoweb.newsbank.com/resources/doc/nb/news/1287B7DBC468A598?p=AWNB	Monte Whaley The Denver Post	2009-05-28	No
Denver Post	Weed Pesticide Resistance	SCIENCE STAR AT 17	http://infoweb.newsbank.com/resources/doc/nb/news/14508240A1A96A98?p=AWNB	Kevin Simpson; Kevin Simpson, The Denver Post	2013-03-14	No	Acquire
HoNolulu Star-Advertiser	Weed Pesticide Resistance	Government might deregulate corn, soybean seeds	http://infoweb.newsbank.com/resources/doc/nb/news/14B24DAD2D4ED0E0?p=AWNB	M.L. Johnson	2014-01-03	Yes	Acquire, Develop
HoNolulu Star-Advertiser	Weed Pesticide Resistance	More weeds grow resistant to herbicides	http://infoweb.newsbank.com/resources/doc/nb/news/1507FE44A74C6CC0?p=AWNB	Fred Pollock	2014-09-21	No
Houston Chronicle	Weed Pesticide Resistance	Pigweed gene protects crop from weed killer	http://infoweb.newsbank.com/resources/doc/nb/news/0ED7ABDE75BCB5C9?p=AWNB	DANIEL Q. HANEY, Associated Press	1986-01-12	No
Houston Chronicle	Weed Pesticide Resistance	Genetically altered plants pass traits on to weeds, experts report	http://infoweb.newsbank.com/resources/doc/nb/news/0ED7B5134C1FB5C0?p=AWNB	ROBERT LEE HOTZ, Los Angeles Times	1996-03-08	No
Houston Chronicle	Weed Pesticide Resistance	Gene-altered crops grow in popularity	http://infoweb.newsbank.com/resources/doc/nb/news/0F29837AC2952BFD?p=AWNB	Associated Press	2002-03-29	No	Develop
Houston Chronicle	Weed Pesticide Resistance	Weeds start to resist top herbicide - As effectiveness wanes, scientists urge new planting practices	http://infoweb.newsbank.com/resources/doc/nb/news/0FDB8E87707091A2?p=AWNB	EMILY GERSEMA, Associated Press	2003-09-21	No	Develop
Houston Chronicle	Weed Pesticide Resistance	Agriculture - Feds may deregulate corn, soybean seeds	http://infoweb.newsbank.com/resources/doc/nb/news/14B2D50F5E88C5C0?p=AWNB	ASSOCIATED PRESS	2014-01-04	Yes	Develop, Acquire
Houston Chronicle	Weed Pesticide Resistance	Farmers' fight to control weeds threatens nearby grape crops	http://infoweb.newsbank.com/resources/doc/nb/news/151CF7C1EA798130?p=AWNB	Bill Lambrecht	2014-11-24	No
Los Angeles Times	Weed Pesticide Resistance	Natural Controls Urged as Insects, Weeds Rapidly Build Resistance to Pesticides: [Bulldog Edition]	http://search.proquest.com/latimes/docview/292361193/fulltext/32214870DCF34E0APQ/9?accountid=14512	Young, Gayle	1986-07-13	Yes	Develop
Los Angeles Times	Weed Pesticide Resistance	Erosion Control Changes Farmers' Ways: [Bulldog Edition]	http://search.proquest.com/latimes/docview/292827382/fulltext/A4E8B5D7E4164C76PQ/11?accountid=14512	Greene, Robert	1994-09-04	No	Develop
Los Angeles Times	Weed Pesticide Resistance	Engineered Plants Pass New Genes to Weeds, Study Finds; Science: In one instance, resistance to herbicides is transferred. Experts say case shows need to monitor crops.: [Home Edition]	http://search.proquest.com/latimes/docview/293212988/fulltext/D781D3AA65DC45FFPQ/77?accountid=14512	ROBERT LEE HOTZ	1996-03-07	Yes
Los Angeles Times	Weed Pesticide Resistance	Genetically Engineered Plant Raises Fears of 'Superweeds': [Home Edition]	http://search.proquest.com/latimes/docview/421496901/fulltext/A4E8B5D7E4164C76PQ/19?accountid=14512	Los Angeles Times	1998-09-03	No	Emerge
Los Angeles Times	Weed Pesticide Resistance	Commentary; PERSPECTIVE ON SCIENCE; Think Twice Before Trying to Outwit Nature; EA worldwide moratorium should be declared on genetically engineered food crops.: [Home Edition]	http://search.proquest.com/latimes/docview/421398468/fulltext/D781D3AA65DC45FFPQ/98?accountid=14512	Rifkin, Jeremy	1999-06-01	No	Develop
Los Angeles Times	Weed Pesticide Resistance	Altered Corn's No Threat to Butterfly, Researchers Say; Agriculture: Group backed by biotech industry contradicts earlier finding that was embraced by environmentalists.: [Home Edition]	http://search.proquest.com/latimes/docview/421625862/fulltext/D781D3AA65DC45FFPQ/104?accountid=14512	Jacobs, Paul	1999-11-02	No
Los Angeles Times	Weed Pesticide Resistance	THE NATION; SUNDAY REPORT; Biotech Soybeans Plant Seed of Risky Revolution; The genetically altered plant, a wildly successful marketing ploy, has changed farming. Critics fear health dangers and an ecosystem changed forever too.: [Home Edition]	http://search.proquest.com/latimes/docview/421651428/fulltext/A4E8B5D7E4164C76PQ/26?accountid=14512	Simon, Stephanie	2001-07-01	No	Emerge
Los Angeles Times	Weed Pesticide Resistance	U.S. Farmers to Plant More Biotech Crops This Year; Agriculture: Despite international resistance, more than 79 million acres of genetically engineered corn and soybeans are expected.: [HOME EDITION]	http://search.proquest.com/latimes/docview/421716206/fulltext/A4E8B5D7E4164C76PQ/28?accountid=14512	Los Angeles Times	2002-03-29	No	Develop
Los Angeles Times	Weed Pesticide Resistance	Biotech buffet; Folate-rich tomatoes, hypoallergenic peanuts, heart-healthy soybean oil. The next wave of genetically engineered foods is coming -- but will we bite?	http://search.proquest.com/latimes/docview/422162513/fulltext/32214870DCF34E0APQ/17?accountid=14512	Conis, Elena	2007-10-22	Yes
Los Angeles Times	Weed Pesticide Resistance	The drought's testing ground; As corn crops wither, biotech firms see growth potential in gene-modified seeds.	http://search.proquest.com/latimes/docview/1039850279/fulltext/A4E8B5D7E4164C76PQ/38?accountid=14512	Lopez, Ricardo	2012-09-17	No	Develop
Los Angeles Times	Weed Pesticide Resistance	In defense of modified foods; Despite popular suspicion, scientists widely agree that genetically altered crops are safe as any.	http://search.proquest.com/latimes/docview/1114931614/fulltext/32214870DCF34E0APQ/22?accountid=14512	Mestel, Rosie	2012-10-25	No	Develop
Los Angeles Times	Weed Pesticide Resistance	Seeds of dissent	http://search.proquest.com/latimes/docview/1288554042/A5D32B755CE7446APQ/141?accountid=14512	Kimbrell, George; Barker, Debbie	2013-02-19	No	Develop
Los Angeles Times	Weed Pesticide Resistance	Genetic engineering strains old food laws; Under rules written for other uses, corn is classified as a pest and salmon can be a drug.	http://search.proquest.com/latimes/docview/1318988737/fulltext/32214870DCF34E0APQ/23?accountid=14512	Mestel, Rosie	2013-03-24	No	Emerge
Los Angeles Times	Weed Pesticide Resistance	Base food labeling on fact, Not fear; A California bill aimed at bioengineered food would serve mainly to frighten shoppers.	http://search.proquest.com/latimes/docview/1520722086/A5D32B755CE7446APQ/145?accountid=14512	Los Angeles Times	2014-05-05	No
Los Angeles Times	Weed Pesticide Resistance	Escalating the weed wars	http://search.proquest.com/latimes/docview/1566226993/fulltext/A4E8B5D7E4164C76PQ/43?accountid=14512	Los Angeles Times	2014-09-30	No	Develop
Los Angeles Times	Weed Pesticide Resistance	Bioengineered crops in L.A.?	http://search.proquest.com/latimes/docview/1614570149/A5D32B755CE7446APQ/146?accountid=14512	Los Angeles Times	2014-10-22	No
Minneapolis Star-Tribune	Weed Pesticide Resistance	Gene experiment could herald a farm revolution	http://infoweb.newsbank.com/resources/doc/nb/news/0EFE488E07008934?p=AWNB	Sharon Schmickle	1988-12-17	No
Minneapolis Star-Tribune	Weed Pesticide Resistance	Biotech corn, beans boost farmer income	http://infoweb.newsbank.com/resources/doc/nb/news/105E13A010D3CDDD?p=AWNB	Joy Powell	2004-10-21	No
Minneapolis Star-Tribune	Weed Pesticide Resistance	THE VANISHING PRAIRIE - Those bugs 'are going to outsmart us' - As nature Adapts to chemicals and GM seeds, farmers face new threats.	http://infoweb.newsbank.com/resources/doc/nb/news/142D37E474D6C390?p=AWNB	JOSEPHINE MARCOTTY	2012-11-24	Yes	Adapt, Develop
Minneapolis Star-Tribune	Weed Pesticide Resistance	breaking the grip of the ‘superweeds’ - Crops are put at risk by plants that have become resistant to common herbicides	http://infoweb.newsbank.com/resources/doc/nb/news/14F80A48FB178870?p=AWNB	TOM MEERSMAN; STAFF WRITER	2014-08-02	No	Develop, Adapt
New York Times	Weed Pesticide Resistance	Science Academy Recommends Resumption of Natural Farming	http://search.proquest.com/nytimes/docview/427369004/fulltext/C32A4B32A430469EPQ/26?accountid=14512	Keith Schneider	1989-09-08	No	Develop
New York Times	Weed Pesticide Resistance	Widely Used Crop Herbicide Is Losing Weed Resistance	http://search.proquest.com/nytimes/docview/432299120/fulltext/9C2D9309BC2D48B1PQ/3?accountid=14512	Andrew Pollack	2003-01-14	Yes	Develop, Emerge
New York Times	Weed Pesticide Resistance	Genes From Engineered Grass Spread for Miles, Study Finds	http://search.proquest.com/nytimes/docview/432861720/fulltext/9C2D9309BC2D48B1PQ/7?accountid=14512	Andrew Pollack	2004-09-21	No	Develop
New York Times	Weed Pesticide Resistance	U.S. Agency Violated Law In Seed Case, Judge Rules	http://search.proquest.com/nytimes/docview/433512109/fulltext/A7F8A6456C4F4686PQ/30?accountid=14512	Andrew Pollack	2007-02-14	No	Develop
New York Times	Weed Pesticide Resistance	Round 2 for Biotech Beets	http://search.proquest.com/nytimes/docview/433711067/fulltext/9C2D9309BC2D48B1PQ/10?accountid=14512	Andrew Pollack	2007-11-27	No	Develop
New York Times	Weed Pesticide Resistance	Weird Changes at the Grass-Roots Level	http://search.proquest.com/nytimes/docview/215465181/A7F8A6456C4F4686PQ/20?accountid=14512	Christopher Tom	2008-06-29	No	Develop, Adapt
New York Times	Weed Pesticide Resistance	Rise of the Superweeds	http://search.proquest.com/nytimes/docview/238070516/fulltext/C32A4B32A430469EPQ/8?accountid=14512	William Neuman and Andrew Pollack	2010-05-04	Yes	Emerge
New York Times	Weed Pesticide Resistance	A Battle Over an Engineered Crop	http://search.proquest.com/nytimes/docview/1009416764/fulltext/C32A4B32A430469EPQ/19?accountid=14512	Andrew Pollack	2012-04-26	No	Develop
New York Times	Weed Pesticide Resistance	Looking for Ways to Beat the Weeds	http://search.proquest.com/nytimes/docview/1400058039/fulltext/9C2D9309BC2D48B1PQ/1?accountid=14512	Carl Zimmer	2013-07-16	Yes	Develop, Adapt, Mutate
New York Times	Weed Pesticide Resistance	On Hawaii, a Lonely Quest for Fact	http://search.proquest.com/nytimes/docview/1474046605/C32A4B32A430469EPQ/44?accountid=14512	Amy Harmon	2014-01-05	Yes
New York Times	Weed Pesticide Resistance	Genetic Weapon Against Insects Raises Hope and Fear in Farming	http://search.proquest.com/nytimes/docview/1491897663/C32A4B32A430469EPQ/20?accountid=14512	Andrew Pollack	2014-01-28	Yes
New York Times	Weed Pesticide Resistance	Invader Batters Rural America, Shrugging Off Herbicides	http://search.proquest.com/nytimes/docview/1552537925/C32A4B32A430469EPQ/4?accountid=14512	Wines, Michael	2014-08-12	No	Develop, Mutate
New York Times	Weed Pesticide Resistance	Altered to Withstand Herbicide, Corn and Soybeans Gain Approval	http://search.proquest.com/nytimes/docview/1562594107/9C2D9309BC2D48B1PQ/52?accountid=14512	Andrew Pollack	2014-09-18	No	Develop
Philadelphia Inquirer	Weed Pesticide Resistance	WILL GENETIC TINKERING CREATE A `SUPERWEED'?	http://infoweb.newsbank.com/resources/doc/nb/news/0EB3306F8C3A5941?p=AWNB	Jeff Barnard	1998-09-07	No	Acquire, Emerge
Philadelphia Inquirer	Weed Pesticide Resistance	DANDELION FANCIERS HOPING TO WEED OUT LAWN CHEMICALS \ IN BRYN ATHYN, ACADEMY OF THE NEW CHURCH IS LOOKING FOR ALTERNATIVES	http://infoweb.newsbank.com/resources/doc/nb/news/0EB736715AB56592?p=AWNB	Margie Fishman	2000-10-15	No	Develop
Salt Lake City Deseret News	Weed Pesticide Resistance	Plant scientists see risks in genetic engineering	http://infoweb.newsbank.com/resources/doc/nb/news/0F364C32404899C6?p=AWNB	Jeff Barnard	1998-09-05	No	Acquire
Salt Lake City Deseret News	Weed Pesticide Resistance	Study echoes warnings of evolving weeds that weed killers can No longer conquer	http://infoweb.newsbank.com/resources/doc/nb/news/12F4DC32D40AE3D0?p=AWNB	Scott CaNon;	2010-04-24	Yes	Develop
San Francisco Chronicle	Weed Pesticide Resistance	NIGHT OF THE LIVING GENES - Safety fears sprout from biotech farms	http://infoweb.newsbank.com/resources/doc/nb/news/0EB4F73BDB34DCF2?p=AWNB	Carl T. Hall	1996-03-14	No
San Francisco Chronicle	Weed Pesticide Resistance	Debate on 'Frankenfoods' intensifies worldwide	http://infoweb.newsbank.com/resources/doc/nb/news/0FBDB3BEBAE3695B?p=AWNB	Bernadette Tansey,	2003-06-23	No
San Francisco Chronicle	Weed Pesticide Resistance	Modified crops battle steps up as doubts grow	http://infoweb.newsbank.com/resources/doc/nb/news/13E78B66D6B464A8?p=AWNB	Carolyn Lochhead	2012-04-30	Yes
St. Paul Pioneer Press	Weed Pesticide Resistance	Experiment in the field - As the debate continues, the next generation of genetically modified crops is on the way.	http://infoweb.newsbank.com/resources/doc/nb/news/138BF0FD96F66EE8?p=AWNB	Tom Webb	2011-07-24	No	Emerge
St. Paul Pioneer Press	Weed Pesticide Resistance	Government proposes deregulating corn, soybean seeds - But critics fear farmers would use more weed killers	http://infoweb.newsbank.com/resources/doc/nb/news/14B345598D5427B8?p=AWNB	Associated Press	2014-01-04	Yes	Acquire, Develop
USA Today	Weed Pesticide Resistance	The power of biotechNology to reshape agriculture and rural America is so great that decisions about what research to conduct - and which fruits of biotechNology to pluck - shouldn't be made solely in the lab, a growing number of scientists and others are concluding	http://infoweb.newsbank.com/resources/doc/nb/news/12820827D19E25A8?p=AWNB	N/A	1989-05-25	Yes
USA Today	Weed Pesticide Resistance	HERBICIDE-RESISTANT SEED DevelopMENT IS UNDER FIRE	http://infoweb.newsbank.com/resources/doc/nb/news/128129556C3BE210?p=AWNB	GEORGE ANTHAN	1990-03-20	No	Develop
USA Today	Weed Pesticide Resistance	Weeds showing herbicide resistance	http://infoweb.newsbank.com/resources/doc/nb/news/127E2B773514B6F0?p=AWNB	GEORGE ANTHAN	1997-05-27	Yes	Develop, Adapt
USA Today	Weed Pesticide Resistance	Effects of genetically engineered alfalfa cultivate a debate - Judge says more environmental studies needed	http://infoweb.newsbank.com/resources/doc/nb/news/11E5E910C7B06628?p=AWNB	Elizabeth Weise	2007-02-15	No
USA Today	Weed Pesticide Resistance	As effectiveness fades, herbicide costs increase - Farmers must use more Roundup on resistant weeds	http://infoweb.newsbank.com/resources/doc/nb/news/13E349DF2D375528?p=AWNB	Kevin Pieper	2012-04-17	Yes
USA Today	Weed Pesticide Resistance	Amid promise and turmoil, biotech crops face uncertain future	http://infoweb.newsbank.com/resources/doc/nb/news/149617C6E2E9E978?p=AWNB	Christopher Doering	2013-10-10	No
USA Today	Weed Pesticide Resistance	Iowans split over whether USDA should approve Dow's GMO corn and soybeans	http://infoweb.newsbank.com/resources/doc/nb/news/14C346A2CEF49918?p=AWNB	Christopher Doering	2014-02-24	No
USA Today	Weed Pesticide Resistance	Monsanto in dispute with veggie farmers over herbicide	http://infoweb.newsbank.com/resources/doc/nb/news/14C8DA9CB93E8A80?p=AWNB	Elizabeth Weise	2014-03-13	No	Develop
USA Today	Weed Pesticide Resistance	New Dow AgroSciences seeds and chemicals leave farmers excited, frustrated	http://infoweb.newsbank.com/resources/doc/nb/news/14CE74B85099DCD8?p=AWNB	Christopher Doering	2014-03-28	No	Develop
USA Today	Weed Pesticide Resistance	Superweeds' choke Iowa farms	http://infoweb.newsbank.com/resources/doc/nb/news/14EA7883C16D4F88?p=AWNB	Donnelle Eller	2014-06-22	Yes	Develop
USA Today	Weed Pesticide Resistance	EPA approves new herbicide for Dow biotech corn, soy	http://infoweb.newsbank.com/resources/doc/nb/news/15105EFC2336A218?p=AWNB	Christopher Doering	2014-10-15	No	Develop
USA Today	Weed Pesticide Resistance	EPA violated Endangered Species Act in approving Dow herbicide, lawsuit contends	http://infoweb.newsbank.com/resources/doc/nb/news/1536F5B4080F08B8?p=AWNB	Christopher Doering	2015-02-09	No
Wall Street Journal	Weed Pesticide Resistance	Hardy Crops Yield Herbicide Controversy	http://search.proquest.com/wallstreetjournal/docview/398223524/fulltext/99FD2A23B78C419EPQ/4?accountid=14512	Nazario, Sonia L	1991-08-01	No	Develop
Wall Street Journal	Weed Pesticide Resistance	Business Brief -- FMC Corp.: Chemicals Company Plans To Build $88 Million Plant	http://search.proquest.com/wallstreetjournal/docview/398407381/CEB915146A254E3FPQ/33?accountid=14512	N/A	1994-11-03	No	Develop
Wall Street Journal	Weed Pesticide Resistance	Seed Money: Huge Biotech Harvest Is a Boon for Farmers -- And for Monsanto --- Genetically Engineered Crops Transform Some Fields, And Maybe the Company --- Protesters Paint Soybeans	http://search.proquest.com/wallstreetjournal/docview/398549912/4EBB783788EA45DDPQ/65?accountid=14512	Peter Fritsch and Scott Kilman	1996-10-24	Yes	Develop
Wall Street Journal	Weed Pesticide Resistance	Modified Crops Touted	http://search.proquest.com/wallstreetjournal/docview/237984447/4EBB783788EA45DDPQ/84?accountid=14512	Kilman, Scott	2010-04-14	No	Develop
Wall Street Journal	Weed Pesticide Resistance	Superweed Outbreak Triggers Arms Race	http://search.proquest.com/wallstreetjournal/docview/499143608/4EBB783788EA45DDPQ/78?accountid=14512	Scott Kilman	2010-06-03	Yes	Develop, Adapt
Wall Street Journal	Weed Pesticide Resistance	Monsanto: Battered, Bruised, and Still Growing	http://search.proquest.com/wallstreetjournal/docview/1282415676/CEB915146A254E3FPQ/22?accountid=14512	Berry, IanAuthor Information	2013-01-30	No	Develop
Wall Street Journal	Weed Pesticide Resistance	Corporate News: DuPont to Pay Monsanto Under Patent Truce	http://search.proquest.com/wallstreetjournal/docview/1319585020/CEB915146A254E3FPQ/39?accountid=14512	Berry, IanAuthor Information	2013-03-27	No	Develop
Wall Street Journal	Weed Pesticide Resistance	Corporate News: Farm Belt Pest Gnaws at Syngenta --- Western Corn Rootworm Grows Hardier Amid Swiss Firm's Efforts to Kill It; Setback for Seed Makers	http://search.proquest.com/wallstreetjournal/docview/1511757302/4EBB783788EA45DDPQ/30?accountid=14512	Bunge, Jacob.	2014-02-04	No	Develop
Wall Street Journal	Weed Pesticide Resistance	For Weed Control, Farmers Widen Their Arsenal of Herbicides; They Gain Edge Against Super Weeds but Add to Costs, Environmental Concerns	http://search.proquest.com/wallstreetjournal/docview/1518925172/4EBB783788EA45DDPQ/68?accountid=14512	Bunge, Jacob	2014-04-25	No	Develop
Wall Street Journal	Weed Pesticide Resistance	Dow Chemical Gets Preliminary U.S. Nod for New Weedkiller; EPA Proposes to Register Herbicide That Has Raised Environmental and Health Concerns	http://search.proquest.com/wallstreetjournal/docview/1520021726/99FD2A23B78C419EPQ/7?accountid=14512	Bunge, Jacob	2014-04-30	No	Develop
Wall Street Journal	Weed Pesticide Resistance	Texas Tries Last-Ditch Attack on Super Weed	http://search.proquest.com/wallstreetjournal/docview/1537529980/4EBB783788EA45DDPQ/29?accountid=14512	Newman, Jesse	2014-06-10	No	Develop
Wall Street Journal	Weed Pesticide Resistance	EPA Denies Texas Emergency Weedkiller Request; Texas Sought Permission for Farmers to Use Propazine on Cotton Fields	http://search.proquest.com/wallstreetjournal/docview/1547352048/4EBB783788EA45DDPQ/33?accountid=14512	Bunge, Jacob	2014-07-22	No	Develop
Wall Street Journal	Weed Pesticide Resistance	Monsanto Expects 2014 U.S. Approval for New Soybean Seeds; Companys Says It Expects to Begin Selling Seeds Resistant to Broader Range of Herbicides in 2016	http://search.proquest.com/wallstreetjournal/docview/1554672319/CEB915146A254E3FPQ/23?accountid=14512	Bunge, Jacob	2014-08-20	No	Develop
Wall Street Journal	Weed Pesticide Resistance	EPA Approves New Dow Chemical Weed Killer; Herbicide Initially Can Be Used in Six States; EPA Approval Will Enable Dow to Sell Genetically Modified Seeds	http://search.proquest.com/wallstreetjournal/docview/1611835278/99FD2A23B78C419EPQ/20?accountid=14512	Kesmodel, David; Bunge, Jacob	2014-10-15	No	Develop
Wall Street Journal	Weed Pesticide Resistance	The Race Is On to Find Organic Pesticides; Hunt for Beneficial Microbes Comes Amid Regulatory Scrutiny of Man-Made Chemical Insecticides	http://search.proquest.com/wallstreetjournal/docview/1614529519/4EBB783788EA45DDPQ/13?accountid=14512	Bunge, Jacob.	2014-10-21	No	Develop
Wall Street Journal	Weed Pesticide Resistance	U.S. Approves New Monsanto Soybean, Cotton Seeds	http://search.proquest.com/wallstreetjournal/docview/1645729555/CEB915146A254E3FPQ/21?accountid=14512	Bunge, Jacob	2015-01-15	Yes	Develop, Emerge
Wall Street Journal	Weed Pesticide Resistance	Monsanto Makes Bid To Go Big In Pesticides	http://search.proquest.com/wallstreetjournal/docview/1679858055/CEB915146A254E3FPQ/37?accountid=14512	Bunge, Jacob; Morse, Andrew	2015-05-09	Yes
Wall Street Journal	Weed Pesticide Resistance	EPA Seeks to Revoke Approval of Dow Chemical's Enlist Duo Herbicide; Environmental agency says ingredients could be more harmful to surrounding plants than it thought	http://search.proquest.com/wallstreetjournal/docview/1735988949/4EBB783788EA45DDPQ/34?accountid=14512	Newman, Jesse	2015-11-25	No	Develop
